# Supplementary material for: Global trends toward urban street-network sprawl
Source: PubMed Central journal article supplement — Proc Natl Acad Sci U S A. 2020 Jan 14;117(4):1941–50. doi: 10.1073/pnas.1905232116 (PMC6994978; doi:10.1073/pnas.1905232116), 2020-01-14

# Supporting Information for: Global trends towards urban street-network sprawl

Christopher Barrington-Leigh<sup>1,✉</sup>, Adam Millard-Ball<sup>2,✉</sup>,

This document is a supplement to the primary text published in PNAS:

<https://doi.org/10.1073/pnas.1905232116>

Latest update always at:

<https://alum.mit.edu/www/cpbl/publications/2020-PNAS-sprawl>

**1** McGill University; Institute for Health and Social Policy; and McGill School of Environment; Montreal, Canada

**2** University of California Santa Cruz; Environmental Studies Department; Santa Cruz, California

✉Authors are listed alphabetically and contributed equally to this work.

## Contents

|                                                                                                 |           |
|-------------------------------------------------------------------------------------------------|-----------|
| <b>A Urban development time series</b>                                                          | <b>3</b>  |
| <b>B Persistence</b>                                                                            | <b>7</b>  |
| <b>C Sensitivity analysis</b>                                                                   | <b>7</b>  |
| C.1 Inclusion of non-urban roads . . . . .                                                      | 7         |
| C.2 Buffer radius used to separate nodes/junctions . . . . .                                    | 7         |
| C.3 Exclusion of walking and cycling paths . . . . .                                            | 10        |
| <b>D Data and code release</b>                                                                  | <b>11</b> |
| <b>E Citation and contact</b>                                                                   | <b>11</b> |
| <b>References</b>                                                                               | <b>11</b> |
| <b>F Supplemental reference book: results</b>                                                   | <b>12</b> |
| F.1 Distribution of empirical street-network types . . . . .                                    | 12        |
| F.2 Trends and global distributions of key variables . . . . .                                  | 15        |
| F.3 Summary trend plots for selected street-network sprawl measures . . . . .                   | 16        |
| F.4 Road growth rates and connectivity . . . . .                                                | 26        |
| F.5 Countries ranked by urban street-network sprawl (SNDi) of recent road development . . . . . | 28        |
| F.6 Cities ranked by urban street-network sprawl (SNDi) of recent road development . . . . .    | 35        |
| F.7 City maps . . . . .                                                                         | 42        |
| F.8 World maps . . . . .                                                                        | 42        |
| F.9 World region trend plots . . . . .                                                          | 42        |
| F.10 Country trend plots with sub-national regional distributions . . . . .                     | 47        |
| F.11 City trend plots (by region) . . . . .                                                     | 66        |
| F.12 City trend plots (by country) . . . . .                                                    | 71        |

## List of Figures

|     |                                                                                  |    |
|-----|----------------------------------------------------------------------------------|----|
| S1  | Comparison of GHSL and Atlas . . . . .                                           | 4  |
| S2  | Comparison of GHSL with parcel- and census-based measures, USA . . . . .         | 5  |
| S3  | Validation of connectivity time series, using house construction dates . . . . . | 6  |
| S4  | Path dependence in street-network sprawl . . . . .                               | 7  |
| S5  | Sensitivity analysis: global maps . . . . .                                      | 8  |
| S6  | Sensitivity analysis: trends . . . . .                                           | 9  |
| S7  | Distribution of nodes by empirical type . . . . .                                | 13 |
| S8  | Distribution of grid cells by empirical type . . . . .                           | 14 |
| S9  | Global shifts over time . . . . .                                                | 15 |
| S10 | Rate of road growth and SNDi . . . . .                                           | 27 |

## List of Tables

|    |                                                                                     |    |
|----|-------------------------------------------------------------------------------------|----|
| S1 | Countries listed in order of recent urban street-network sprawl (SNDi) . . . . .    | 29 |
| S2 | Cities listed in order of their recent urban street-network sprawl (SNDi) . . . . . | 36 |

## A Urban development time series

The majority of our analysis employs the time series from GHSL, an open-data project providing global spatial information about the human presence on the planet over time [Pesaresi et al., 2013]. Data are available online (<http://ghsl.jrc.ec.europa.eu>). We use the built-up grid which is derived from analysis of Landsat image collections, and provides built-up year classifications with approximately 38 m resolution. Pixels are classified as follows: land not built-up in any epoch; built-up from 2000 to 2014 epochs; built-up from 1990 to 1999 epochs; built-up from 1975 to 1989 epochs; built-up before 1975 epoch. For computational reasons, we aggregate to 306 m resolution, and calculate the built-up year of the aggregated grid cells as the modal built-up year of individual pixels. Each edge and node is assigned the modal epoch of the intersecting pixels.

Our city-level aggregations utilize the time series from *Atlas of Urban Expansion* [Angel et al., 2012, 2016], an open-data online database of city boundaries. The Atlas includes a sample of 200 of the world’s metropolitan areas that had 100,000 people or more in 2010 and provides urban extents at three time points: circa 1990, circa 2000, and circa 2013. We calculate spatial differences between successive time points in order to generate boundaries for new development during the periods 1990–1999 and 2000–2013. We then aggregate our street-level metrics to these regions to characterize development over time in these cities.

Below, we analyze the consistency of the development dates from each source, through comparing them to each other, and to our earlier work in the USA. Figure S1 shows the consistency of our two data sources where they overlap. The GHSL dataset tends to assign an earlier year-built to each node, but the trends are consistent.

For the USA, we also compare the GHSL-based method of generating a time series to our earlier work, which used census and county parcel assessment data [Barrington-Leigh and Millard-Ball, 2015]. The census-based method covers the entire USA and assigns to each block group households’ median report of the year when their house was constructed. The parcel-based method covers only about a third of the USA but makes use of county records’ building construction date for every residential property in order to assign an original construction date for each street segment. As shown in Figure S2, the methods assign closely matching dates to road segments, even though the data sources are completely independent: one relies solely on remote sensing data, while the others rely on self-reported house construction dates. For years through 1999, the inter-quartile range of the census- and parcel-data methods matches GHSL almost exactly. For the most recent period (2000-13), while the median years align (solid red lines), the inter-quartile range does not fully overlap. This is likely due to aggregation bias in census geography, as the block group boundaries do not reflect more recent development.

Consistency in the time series of road network evolution translates into consistency in our main results, which concern the evolution of connectivity over time. Figure S3 presents comparisons of trends in mean degree and fraction of deadends, the two metrics used to characterize sprawl by Barrington-Leigh and Millard-Ball [2015], for the entire USA and for one metropolitan region with good coverage by parcel-based data.

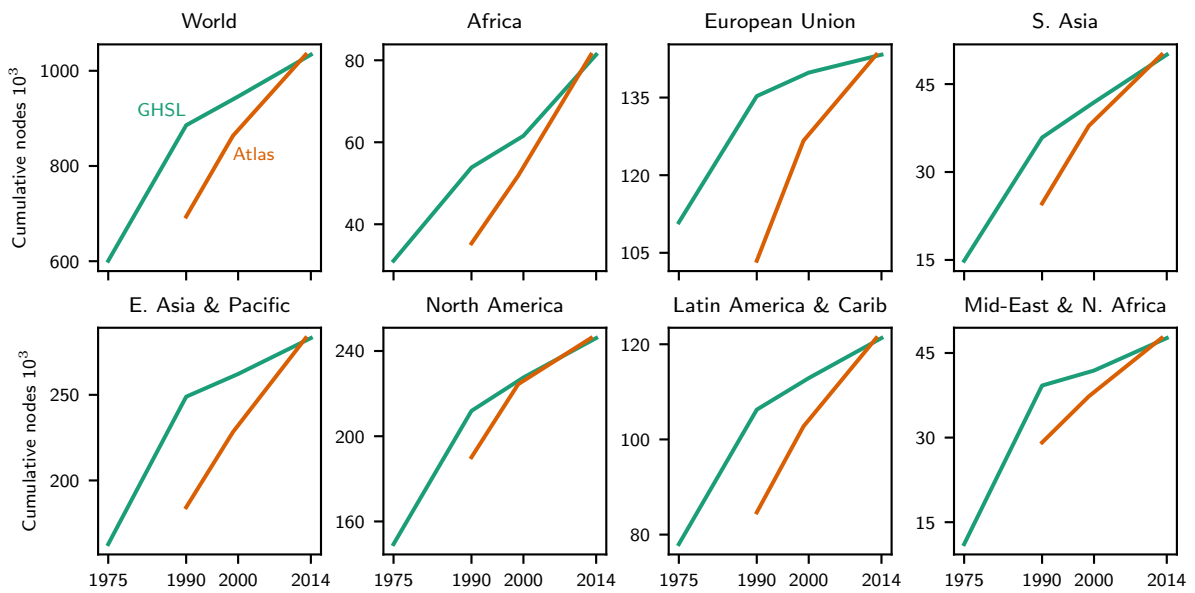

Figure S1: **Comparison of GHSL and Atlas.** Each plot shows the cumulative number of nodes within the Atlas cities, for the entire world and by select World Bank-defined regions. By construction, the cumulative number is equal in 2014.

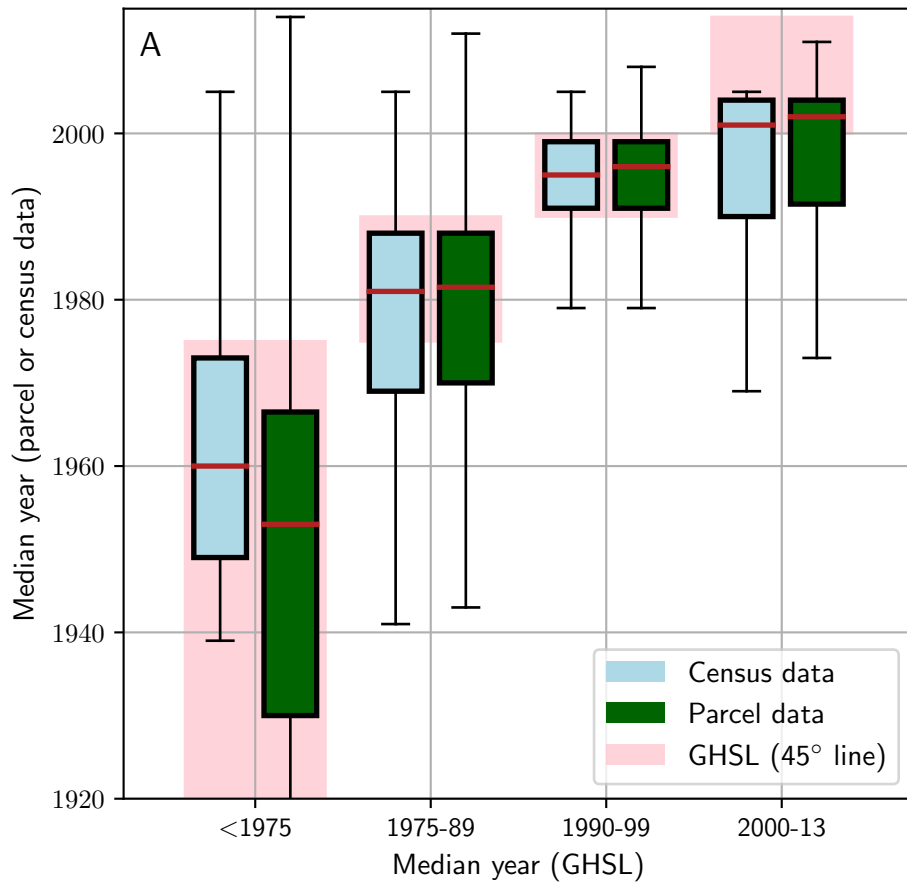

Figure S2: **Comparison of GHSL with parcel- and census-based measures, USA.** The units of analysis are census block groups in urban areas. We take the median GHSL year of each node with a block group, and compare that to the median year built of residential units within the block group (“census data”), and the median year of nodes within the block group, calculated from parcel assessment data on construction years (“parcel data”). Note that the census data have complete coverage, while the parcel-data sample accounts for about one-third of the urban US [Barrington-Leigh and Millard-Ball, 2015].

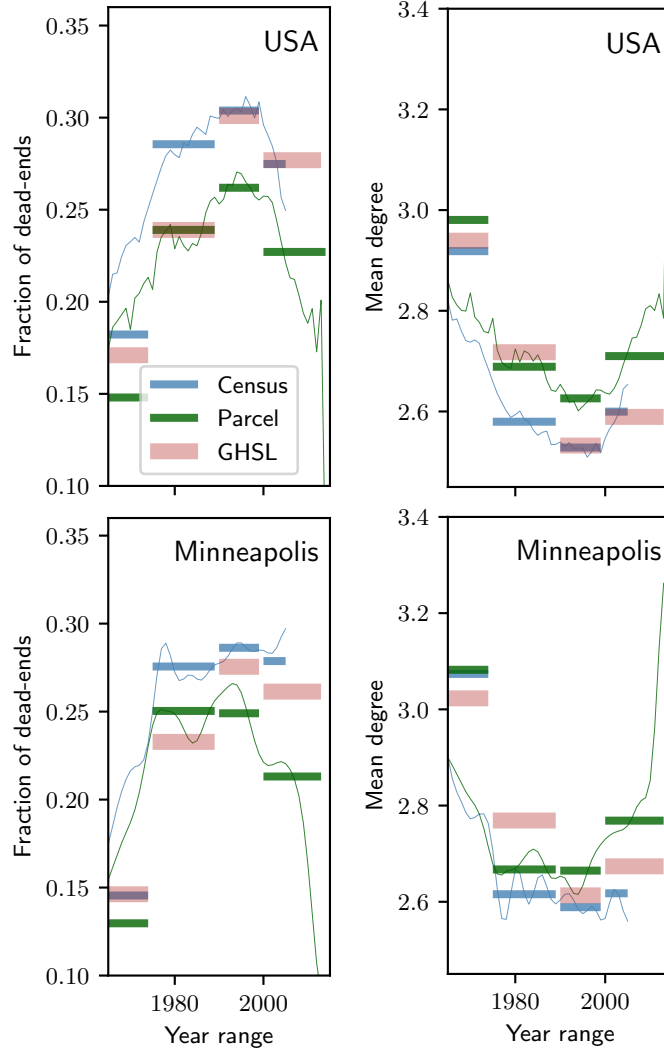

Figure S3: **Validation of connectivity time series, using house construction dates.** The time series of street-network sprawl (measured by the fraction of deadends) in our earlier work [Barrington-Leigh and Millard-Ball, 2015] is consistent with that generated by the remote-sensing method (GHSL) used in our global analysis. We show two connectivity measures calculated for the urban USA in our earlier work (top plots), as well as for the metropolitan area (Minneapolis-St Paul) where tax parcel data have the greatest coverage. For parcel and census data, thin lines show yearly averages (smoothed in the case of Minneapolis) while bars show period averages for comparison with GHSL. The first period average is the stock value up to 1974.

## B Persistence

The main text discusses the persistence of street-network sprawl. Figure S4 repeats a figure from the main text, but provides small, zoomable labels.

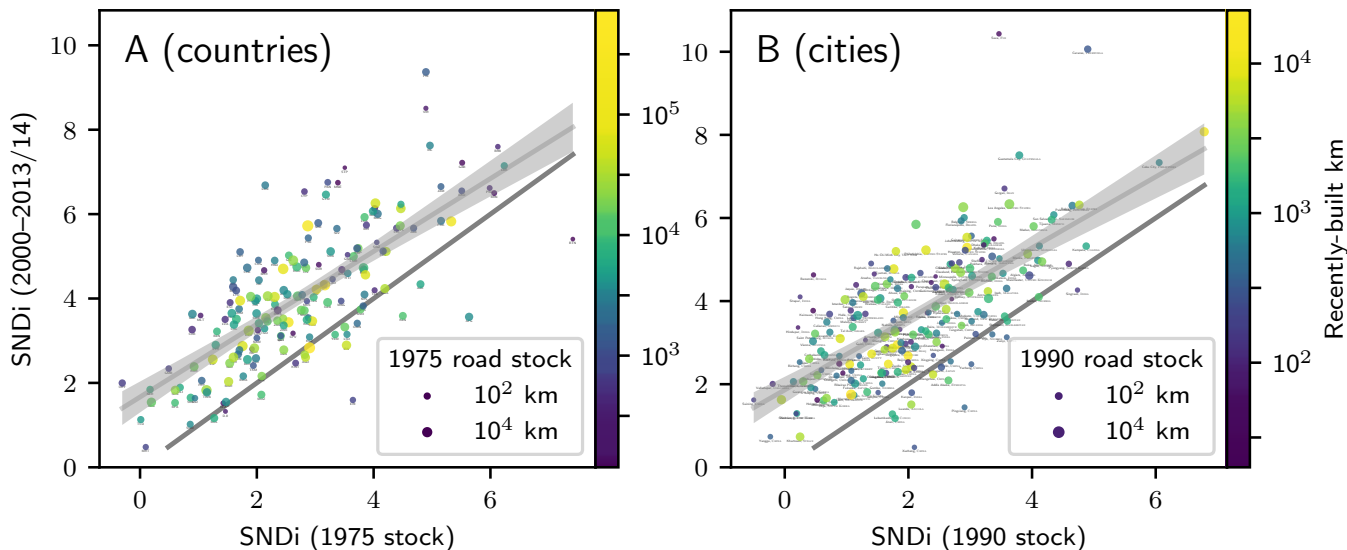

Figure S4: **Path dependence in street-network sprawl.** This figure is repeated from the main text, with the addition of small labels on cities and countries (three-letter ISO) visible by zooming in. SNDi of recent (2000–2013) construction is closely correlated with that of the earlier road stock in 1975 (countries, A) and 1990 (cities, B). Circle size denotes the length of original road stock, while color indicates the scale of recent construction. Only cities and countries with at least 100 km of new roads are shown. Linear fits characterizing the persistence relationship (gray shaded confidence region) are nearly parallel to the 45 degree line of perfect persistence (dark grey line) indicating a relatively uniform shift (on average  $\Delta\text{SNDi} = +1.56$  for cities,  $+1.26$  for countries) away from earlier high connectivity.

## C Sensitivity analysis

### C.1 Inclusion of non-urban roads

While our preferred metrics are based only on the portions of road network we classify as urban, which account for 75% of nodes and 77% of edges (see [Barrington-Leigh and Millard-Ball \[2019\]](#) for details), we also calculate all measures on the full global set of nodes and metrics. Figure S5 and Figure S6 (top-right panels) compare this analysis to the corresponding figures from the main text (top-left panels), and show that including the remaining non-urban nodes and edges makes no qualitative, and only subtle quantitative, differences. There is a small rightward shift in the distribution of SNDi, shown in the inset to Figure S5, particularly in Russia and some countries in northern South America, indicating that non-urban streets tend to be less connected. The qualitative conclusions, however, are unchanged.

### C.2 Buffer radius used to separate nodes/junctions

We reran our entire analysis using a radius of 7 m for merging intersections into nodes in our network representation (lower-left panels in Figure S5 and Figure S6). Aggregate findings are nearly identical to the 10 m version used in our primary analysis.

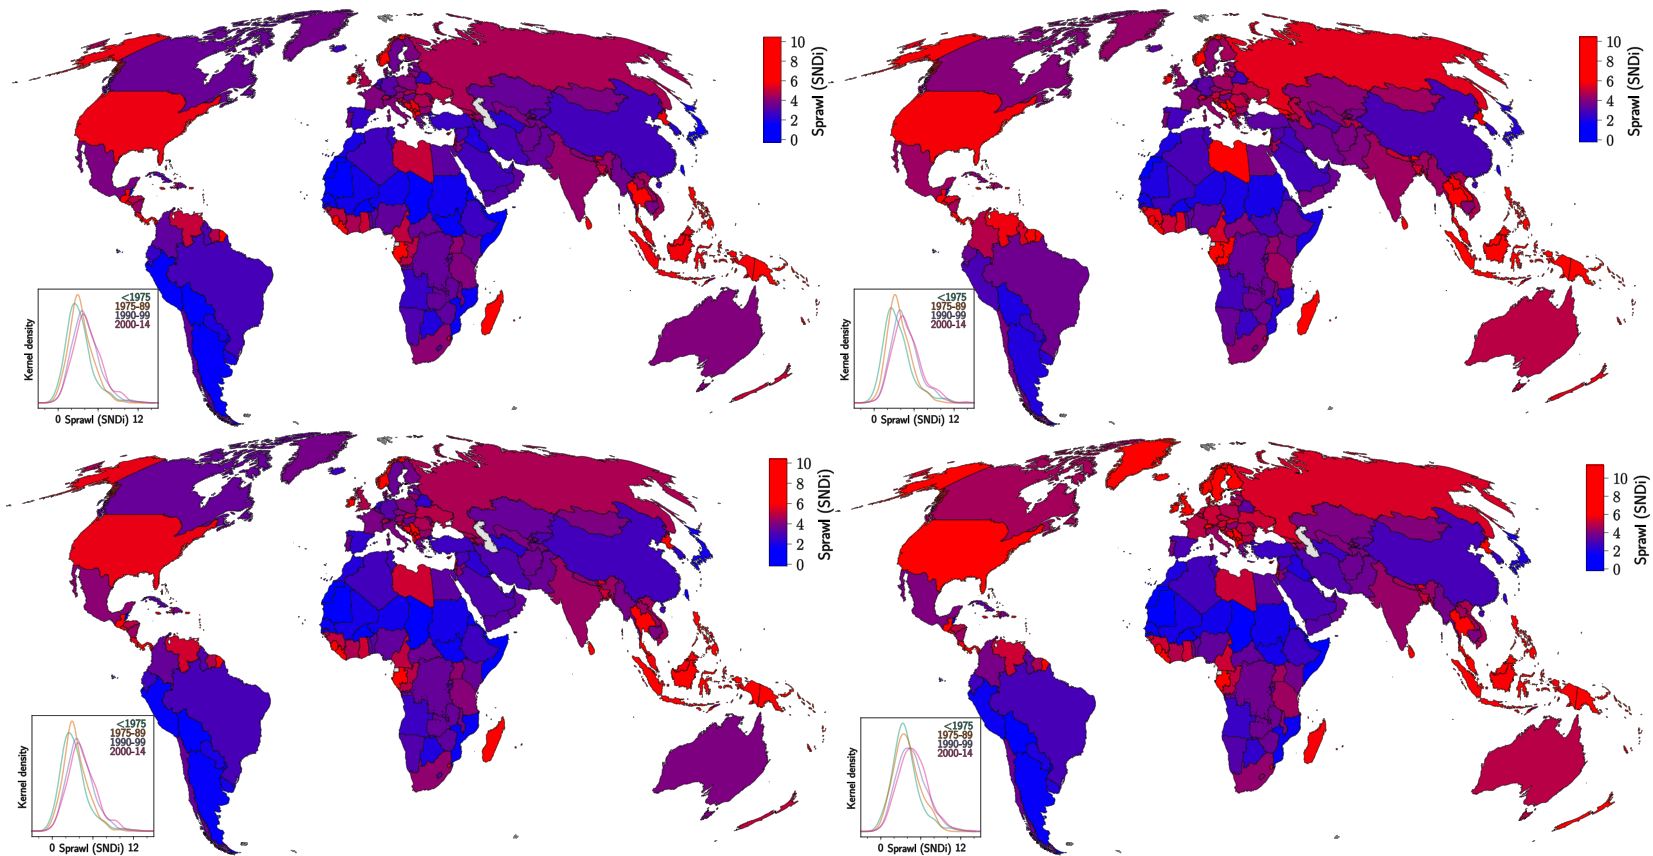

Figure S5: **Sensitivity analysis for Figure 1 from the main text.** The top-left map reproduces Figure 1, recent SNDi, from the main text. At top-right is a version calculated using all (i.e., urban and non-urban) nodes and edges, rather than only those we designate as “urban.” The lower left map is a version calculated with an alternative intersection buffer radius (7 m), and the lower right one is calculated with the exclusion of walking and bicycling paths and service roads.



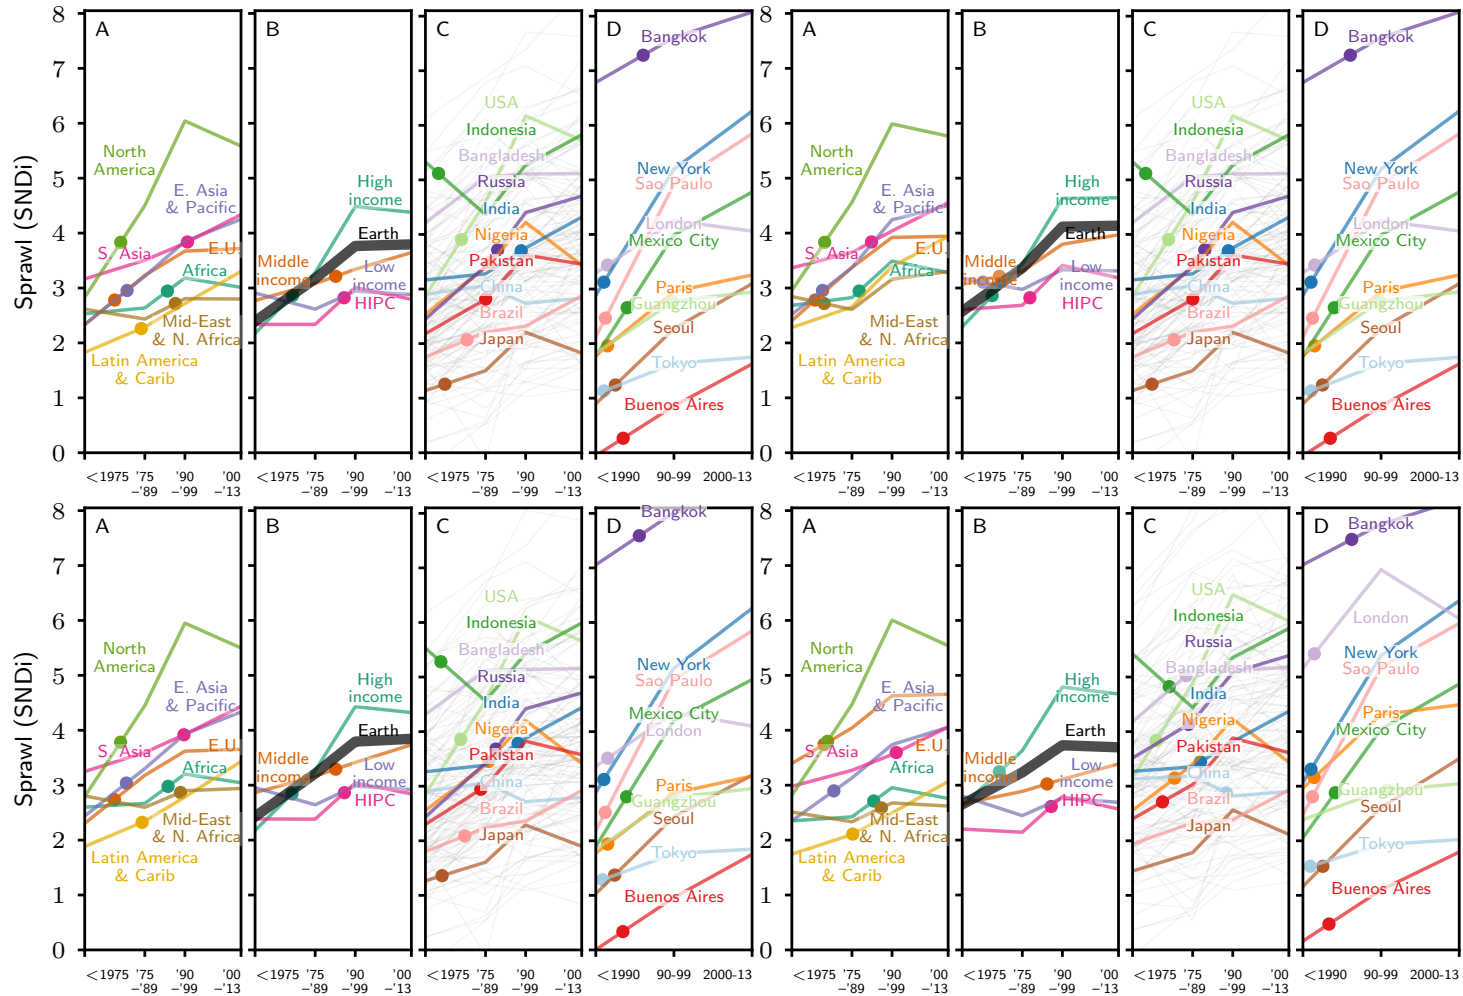

Figure S6: Top left: **Sensitivity analysis for Figure 2 from the main text.** The top-left set of panels reproduces Figure 2, trends in SNDi, from the main text. At top-right is a version calculated using all (i.e., urban and non-urban) nodes and edges, rather than only those we designate as “urban.” The lower left panels are a version calculated with an alternative intersection buffer radius (7 m), and the lower right set are calculated with the exclusion of walking and bicycling paths and service roads. In each panel, the left two sub-plots share an ordinate scale, and the right two share a separate ordinate scale.

### C.3 Exclusion of walking and cycling paths

Our main results aggregate the properties of only those edges and nodes that are accessible by motor vehicle. However, walking and cycling paths, as well as service roads such as driveways, are considered when calculating connectivity. For example, two adjacent culs-de-sac that are connected by a pedestrian path would not be considered deadends. (See [Barrington-Leigh and Millard-Ball \[2019\]](#) for details.) Figure S5 and Figure S6 (lower-right panels) show the results of an analysis that excludes all walking and cycling paths and driveways. Several countries and cities, particularly in the UK, Scandinavia and other parts of Europe, show substantially higher SNDi when the extra paths are completely excluded, indicating that such paths make a major contribution to the connectivity of the street network. The increase in SNDi in London is particularly marked. The discussion in the main text elaborates on the implications for policy.

## D Data and code release

All data used for this work are open. Freely available sources are listed under “Data Release” in [Barrington-Leigh and Millard-Ball \[2019\]](#) and in the Materials and Methods section of the main text. Our code to reproduce the data and analysis, which itself leverages exclusively open-source tools, is released under the [GNU General Public License v3.0](#) as an open source project, permanently available at:

<https://alum.mit.edu/www/cpbl/publications/2020-PNAS-sprawl/code>

That site includes the following description of the code:

<https://gitlab.com/cpbl/global-sprawl-2020/blob/master/README.md>

In addition, we provide the data corresponding to our street-network sprawl metrics aggregated to various levels described in more detail in [Barrington-Leigh and Millard-Ball \[2019\]](#). Data are served from the following site:

<https://alum.mit.edu/www/cpbl/publications/2020-PNAS-sprawl/data>

Moreover, an interactive map interface to our high-resolution results, with links to data downloads, is available at <https://sprawlmap.org>.

## E Citation and contact

For any use of the data or code, please cite the main paper.

For further questions, please contact:

Christopher Barrington-Leigh, McGill University

Adam Millard-Ball, University of California, Santa Cruz

## References

- Shlomo Angel, Alejandro M Blei, Daniel L Civco, and Jason Parent. *Atlas of urban expansion*. Lincoln Institute of Land Policy, Cambridge, MA, 2012. URL <http://atlasofurbanexpansion.org>.
- Shlomo Angel, Alejandro M. Blei, Jason Parent, Patrick Lamson-Hall, Nicolás Galarza Sánchez, with Daniel L. Civco, Rachel Qian Lei, and Kevin Thom. *Atlas of Urban Expansion — 2016 Edition: Volume 1: Areas and Densities*. NYU Urban Expansion Program at New York University, UN-Habitat, and the Lincoln Institute of Land Policy, 2016. URL <http://www.lincolninst.edu/publications/other/atlas-urban-expansion-2016-edition>.
- Christopher Barrington-Leigh and Adam Millard-Ball. *A century of sprawl in the United States*. *Proceedings of the National Academy of Sciences*, 112(27):8244–8249, 2015.
- Christopher Barrington-Leigh and Adam Millard-Ball. A global assessment of street network sprawl. *PLOS ONE*, 2019. doi: <https://doi.org/10.1371/journal.pone.0223078>.
- Martino Pesaresi, Guo Huadong, Xavier Blaes, Daniele Ehrlich, Stefano Ferri, Lionel Gueguen, Matina Halkia, Mayeul Kauffmann, Thomas Kemper, Linlin Lu, et al. A global human settlement layer from optical HR/VHR RS data: concept and first results. *IEEE Journal of Selected Topics in Applied Earth Observations and Remote Sensing*, 6(5):2102–2131, 2013.
- World Bank. World Bank Open Data, 2016. URL <https://blogs.worldbank.org/opendata/new-country-classifications-2016>. <https://blogs.worldbank.org/opendata/new-country-classifications-2016>.

## F Supplemental reference book: results

The sections which follow contain more detailed tabular and graphical renditions of our findings. In addition, extensive online visualizations of our results are available at:

<https://alum.mit.edu/www/cpbl/publications/2020-PNAS-sprawl>

including an interactive map interface to our high-resolution results at:

<https://sprawlmap.org>.

### F.1 Distribution of empirical street-network types

Figure S7 shows the trends over time in the distribution of empirical street-network types by World Bank-defined regions; it is similar to the plot in the main text, but includes additional regions. Figure S8 repeats the figure, but shows the distribution according to the fraction of grid cells (rather than the fraction of nodes) that fall into each cluster.

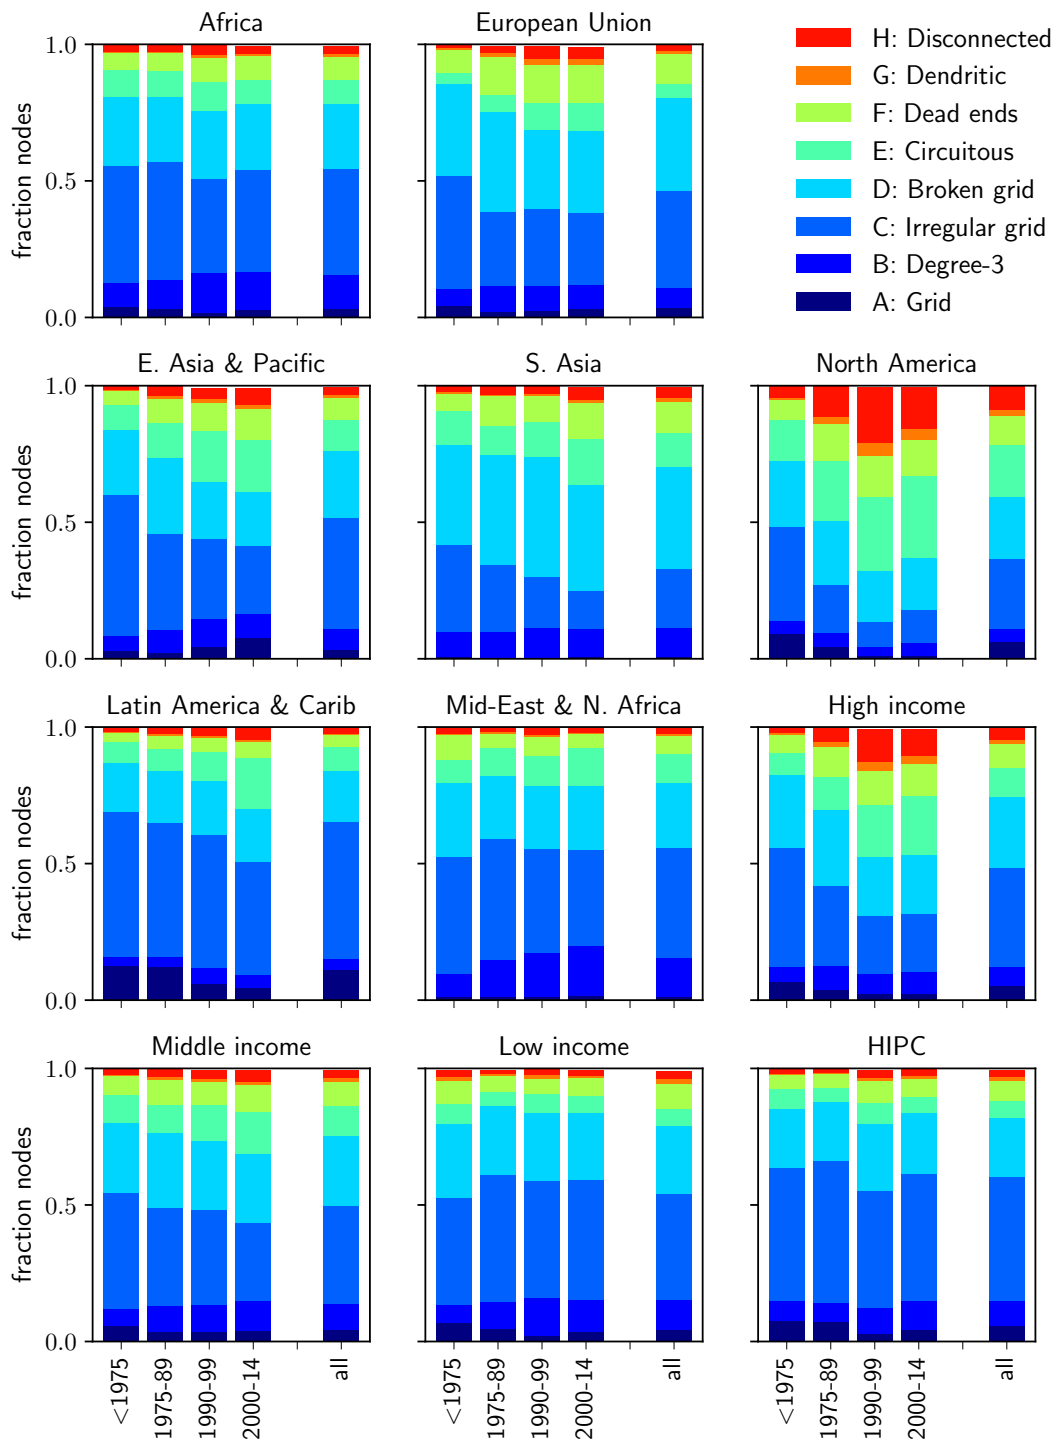

Figure S7: Distribution of nodes by empirical type, by World Bank-defined region and year. The bars represent the fraction of nodes in each type.

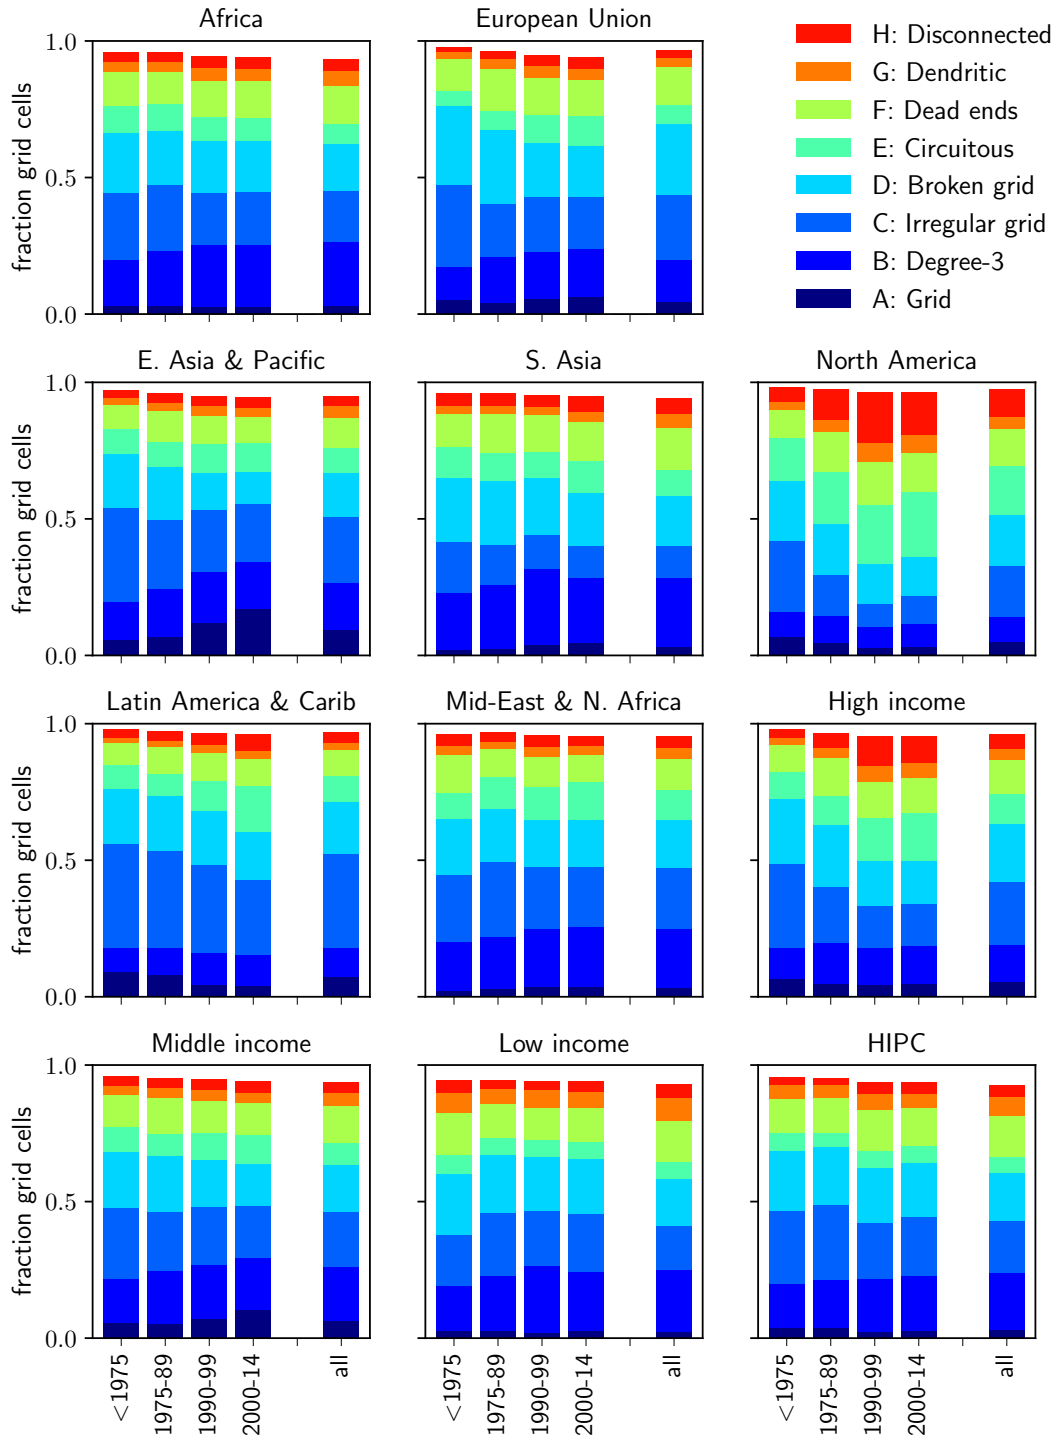

Figure S8: **Distribution of grid cells by empirical type, by World Bank-defined region and year.** The bars represent the fraction of grid cells in each type. (The two types that were dropped are not shown; hence, the bars do not add up to 100%.)

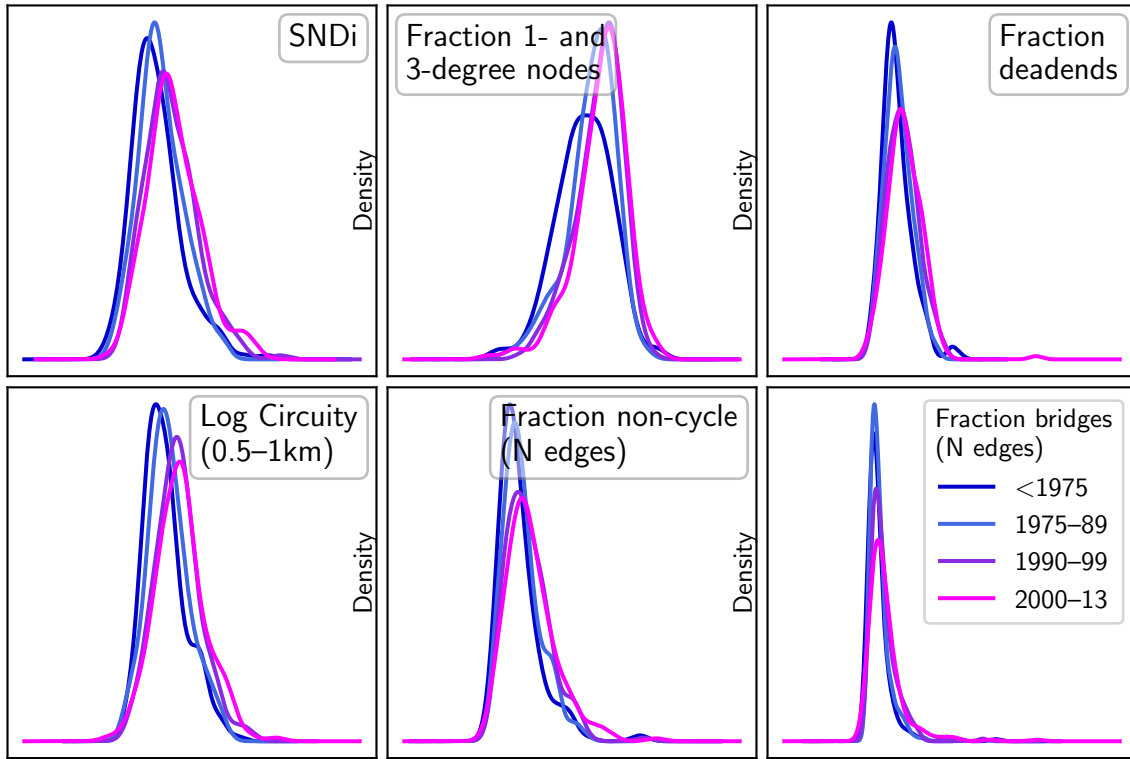

Figure S9: **Global shifts over time.** Curves show kernel density estimates of unweighted country-level means over urban nodes/edges, using built-up year classifications based on GHSL.

## F.2 Trends and global distributions of key variables

Our analysis emphasizes our aggregate (first principal component) measure of street-network sprawl, SNDi. Figure S9 shows how the global distributions of SNDi and five of its individual connectivity measures have evolved over time. In each case, there is a significant shift towards lower connectivity, but with a partial leveling off in the latest time period.

### **F.3 Summary trend plots for selected street-network sprawl measures**

The following pages contain plots in the format of Figure 2 in the main text, but show trends of individual connectivity metrics making up our SNDi index. In each plot, the left two panels share a vertical axis, and the right two panels share a separate vertical axis.



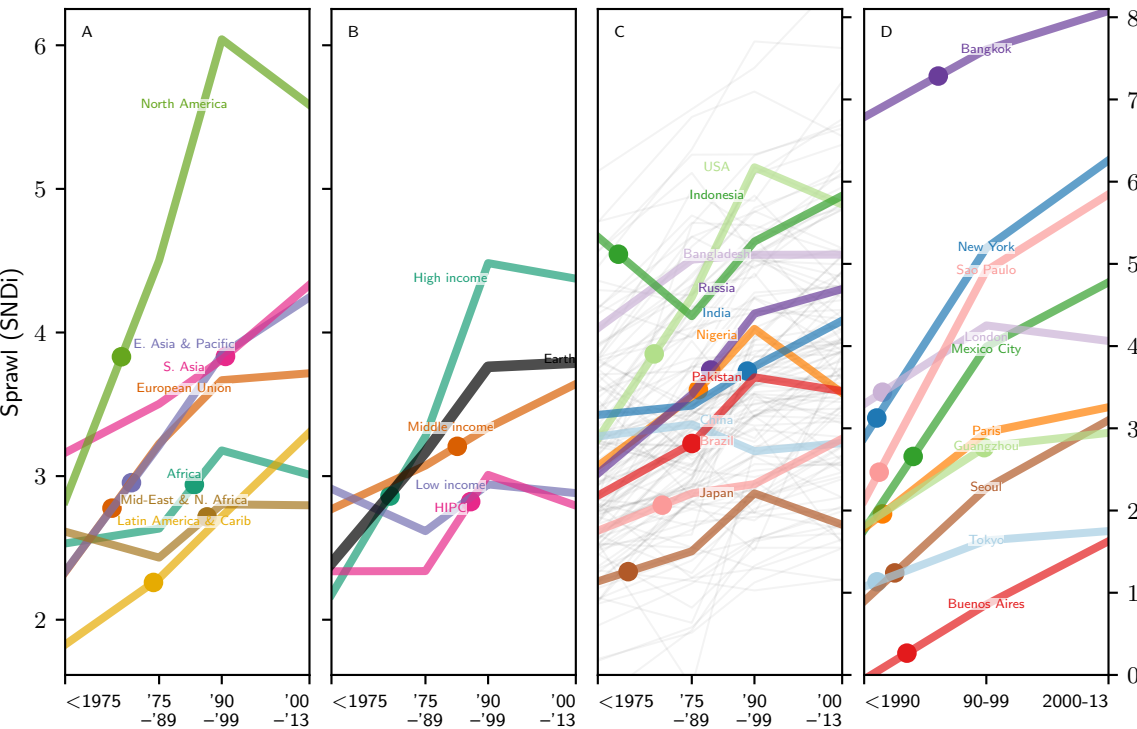

Nodal degree

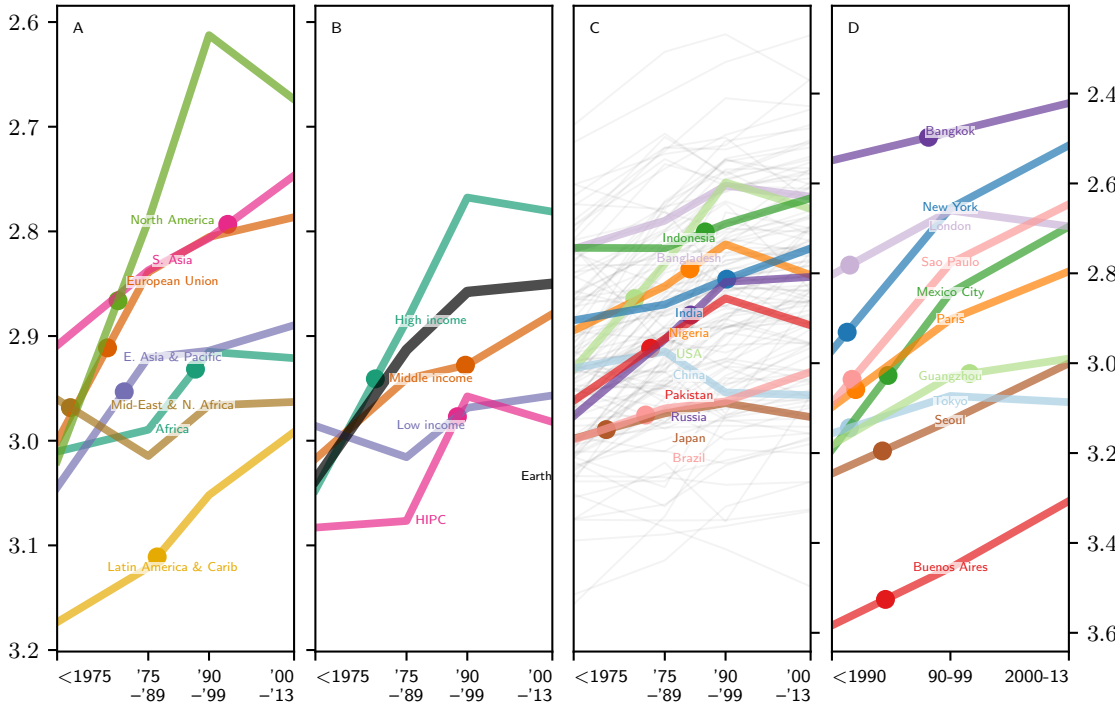

Frc deadends

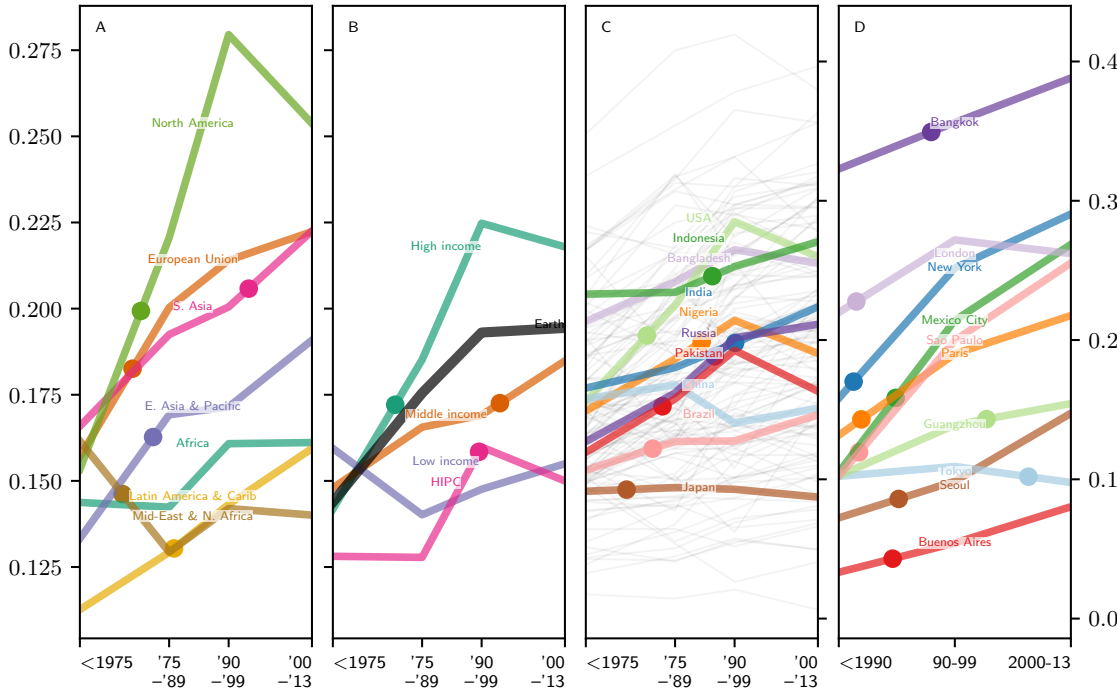

Frc non-cycle (length)

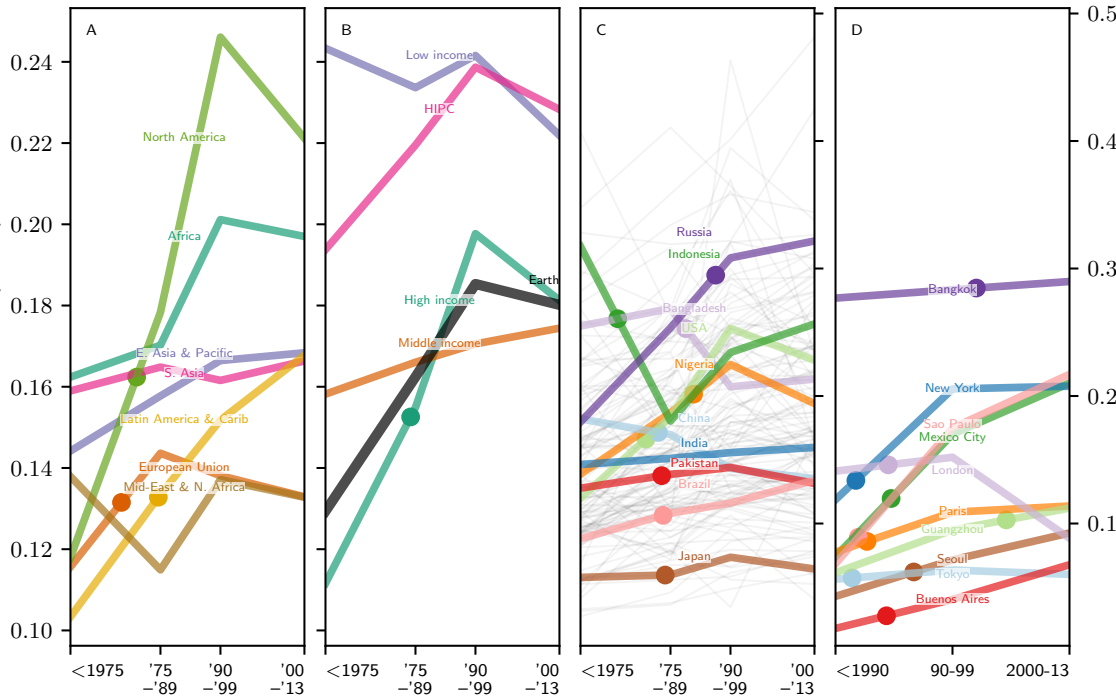

Log Circuity (0.5-1km)

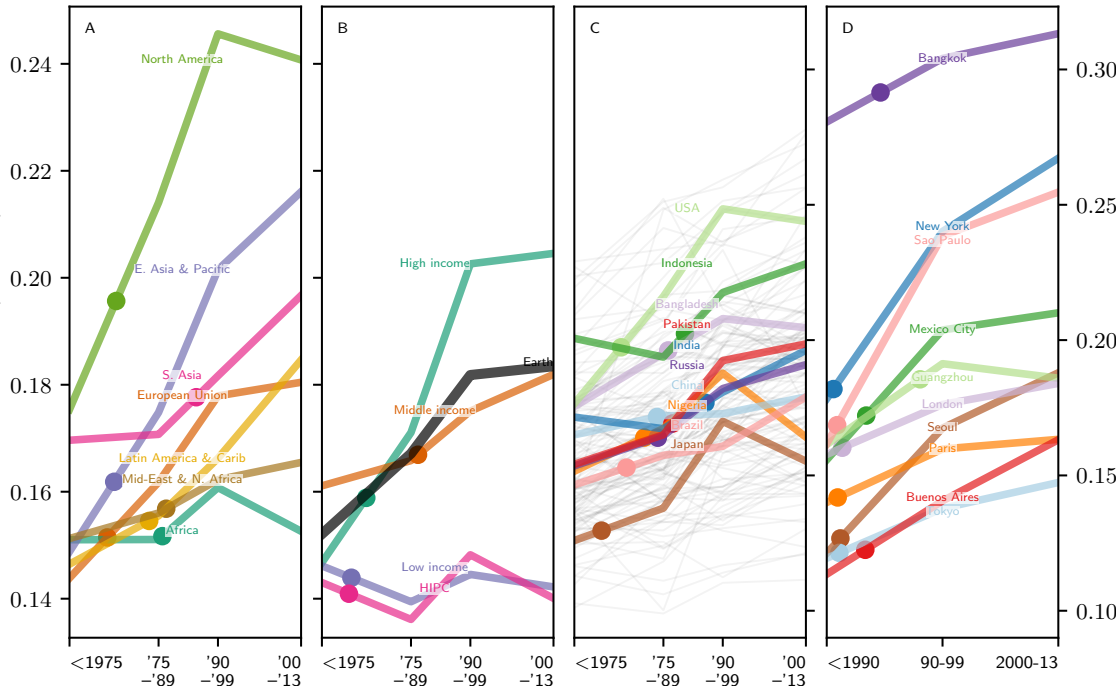

Frc non-cycle (N edges)

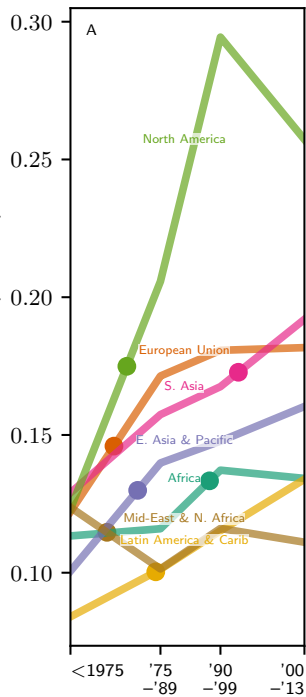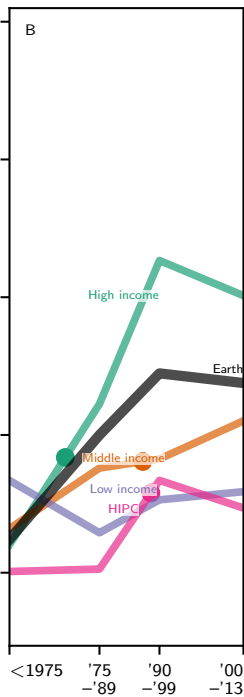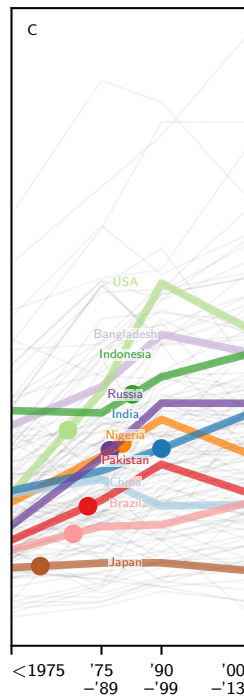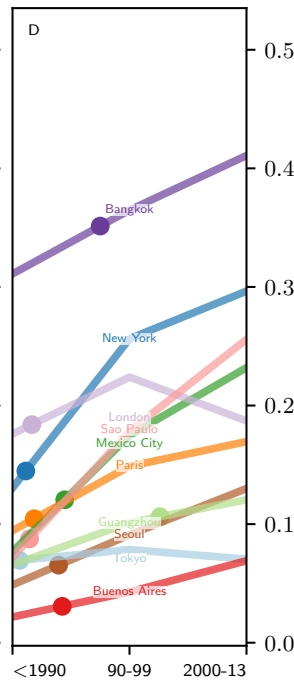

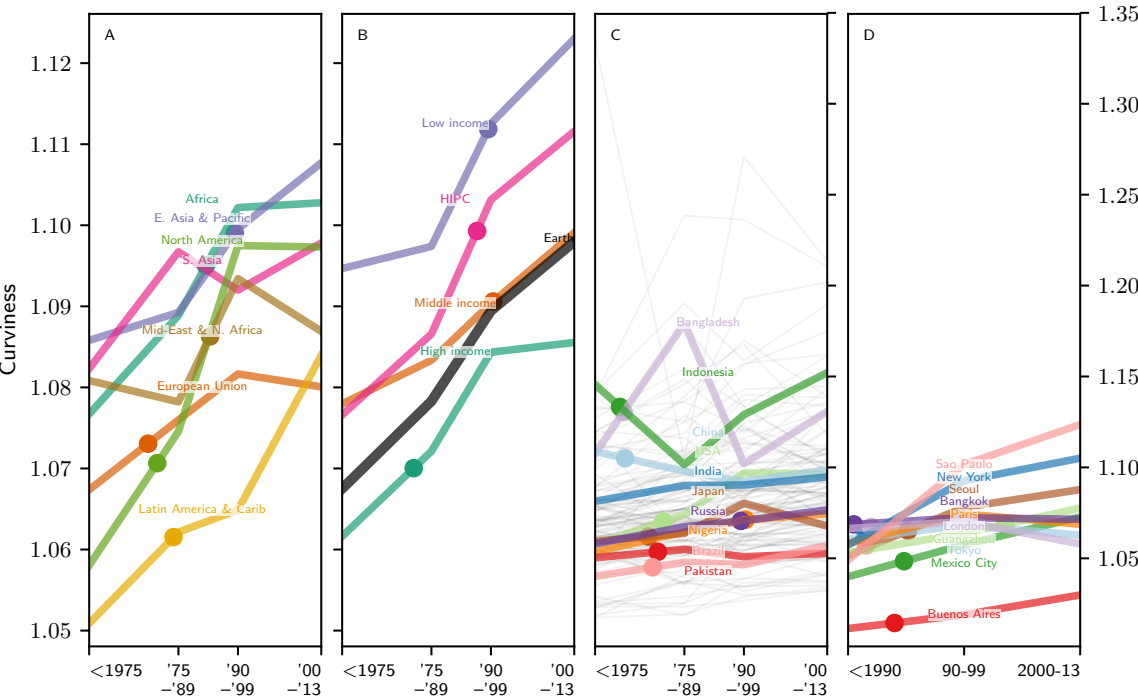

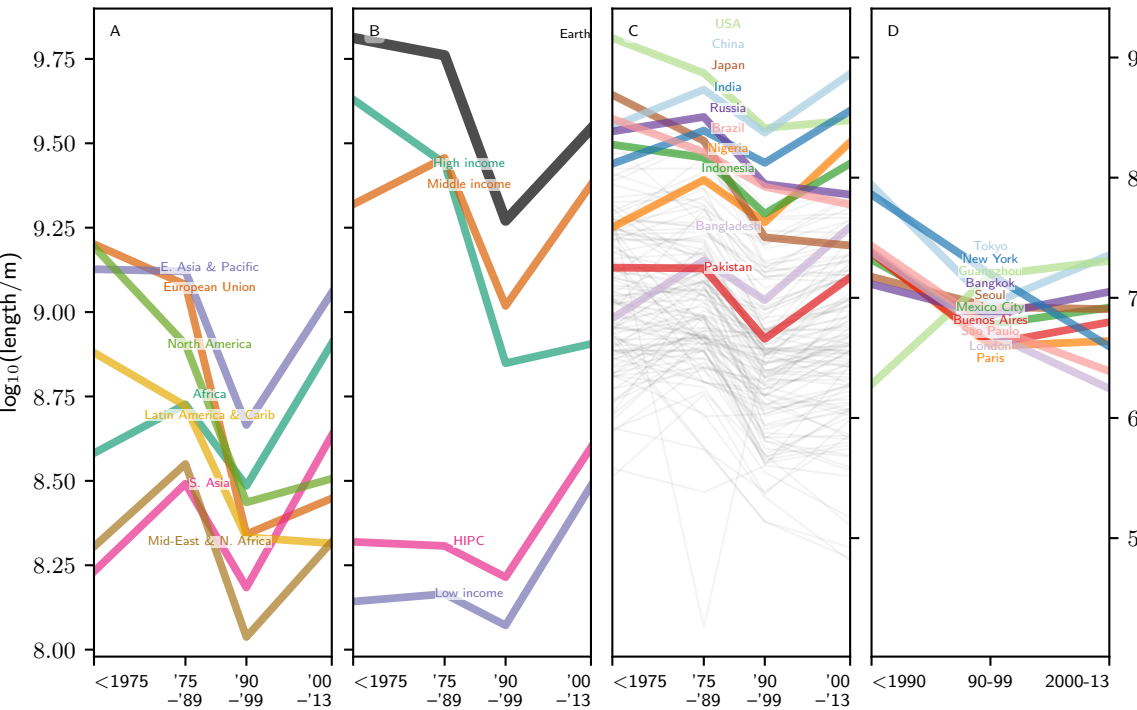



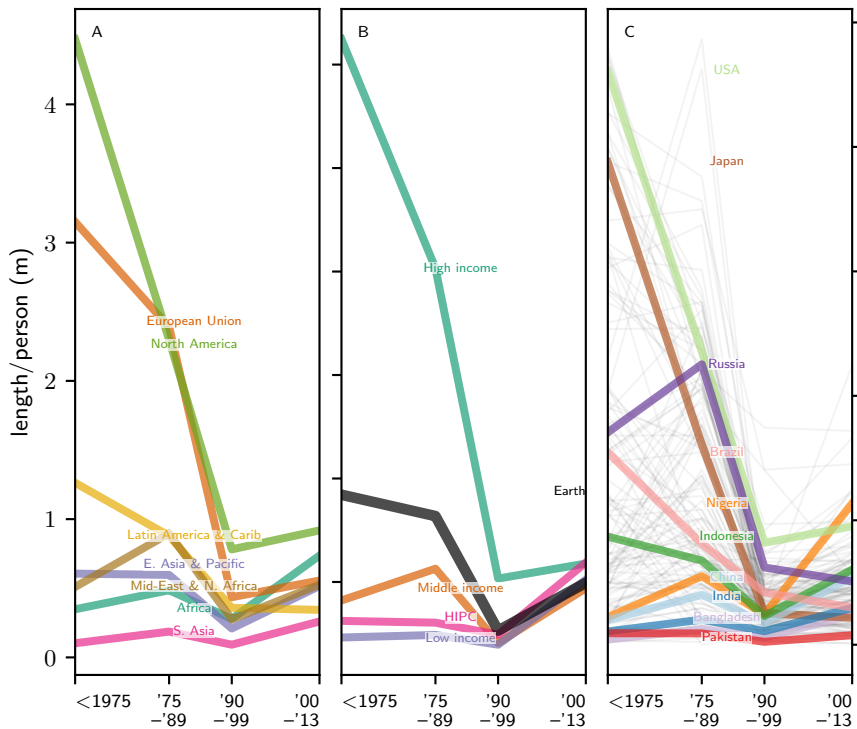

## F.4 Road growth rates and connectivity

Our aggregations from individual road segments (edges) according to GHSL-determined epochs naturally produce estimates of the rate of road growth in each GADM region, grid cell, and Atlas of Urban Expansion city. Of course, these estimates are subject to the same uncertainties as our other calculations, namely the completeness of the OSM street database and the accuracy of GHSL and Atlas classifications.

Because global trends are driven by the size of additions to road stock, we explore the relationship between SNDi and the length of recent additions to the road stock, by city and by country (Figure S10 top row). There is no statistical relationship across cities, and only a weak one across countries. The countries with the largest road growth — China, India, United States, Nigeria, Indonesia, and South Africa — span the range of relatively low to relatively high SNDi. China’s construction of 655,000 km of urban roads during this period is equal to nearly half the entire urban stock in the USA in 1975. Among cities, Bangkok and Tokyo stand out again; Bangkok is among the fastest growing cities, as well as an outlier in the low connectivity of its new street development. Meanwhile, Tokyo and Guangzhou are examples of equally fast or faster growth but with high connectivity. Houston appears to be a (fast-growing) low-connectivity city in the global picture.

In addition to analyzing SNDi against the *magnitude* of growth in roads, we compare it to the *rate* of growth. We define the growth rate of road networks as  $R/(S - R)$ , where  $R$  is the addition to length in the most recent period (2000-2013) and  $S$  is the length of the current stock. Figure S10 (bottom row) shows the relationship between recent SNDi and the road growth rate. Faster-growing cities tend to be building more-connected roads, perhaps largely due to the existence of rapidly-growing, initially-small cities in China. While a relationship holds also across countries, it does not hold statistically within any of our world regions (not shown). In terms of growth rate, the largest countries are in Africa. Similarly, as measured by road length per capita (not shown), African countries make up ten of the top 14 fastest builders. Notably, China is a significant investor in growing African infrastructure.

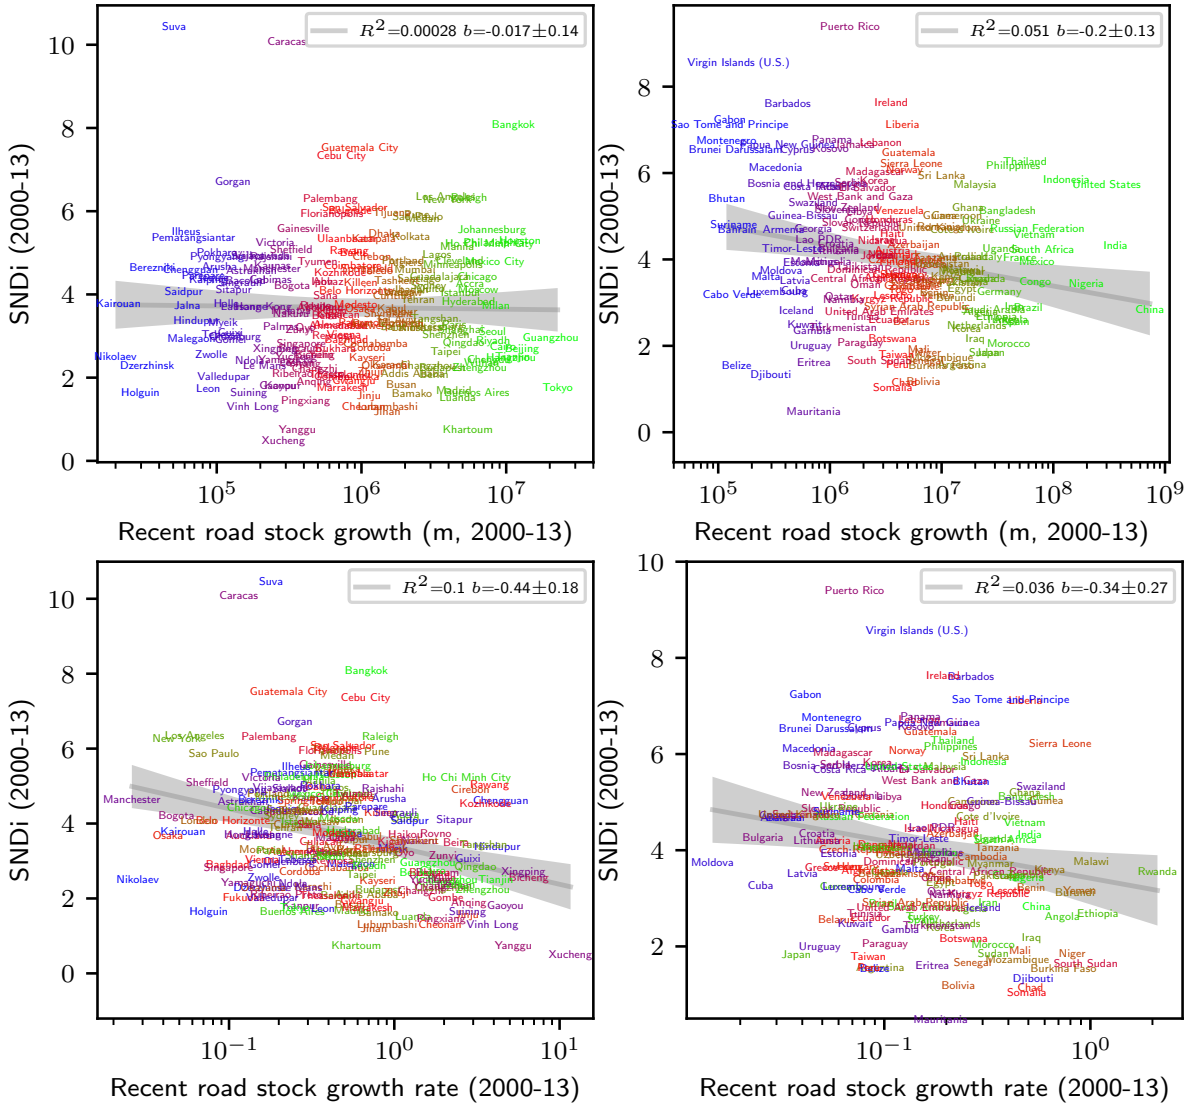

Figure S10: **Rate of road growth and SNI.** Relationships between recently-constructed (2000–2013) street-network sprawl and (top row) recent additions to road stock or (bottom row) recent growth rate of road stock. Cities are shown on the left, and countries on the right. Coefficients ( $b$ ) from OLS fits are shown with 95% confidence range. Colors in the lower panels are defined by the abscissa of the upper ones.

**F.5 Countries ranked by urban street-network sprawl (SNDi) of recent road development**

Table S1: **Countries listed in order of recent urban street-network sprawl (SNDi)**. Countries with large (>20M) population are listed in bold.

|                                  | Sprawl (SNDi) |       |       |         |       | Nodal degree |       |       |         |       | N(nodes) |       |       |         |       |
|----------------------------------|---------------|-------|-------|---------|-------|--------------|-------|-------|---------|-------|----------|-------|-------|---------|-------|
|                                  | <1975         | 75-89 | 90-99 | 2000-13 | Stock | <1975        | 75-89 | 90-99 | 2000-13 | Stock | <1975    | 75-89 | 90-99 | 2000-13 | Stock |
| Puerto Rico                      | 4.9           | 7.7   | 8.9   | 9.4     | 6.5   | 2.7          | 2.4   | 2.3   | 2.3     | 2.5   | 54k      | 47k   | 12k   | 8.2k    | 120k  |
| Virgin Islands (U.S.)            | 4.9           | 7.9   | 8.1   | 8.6     | 7.4   | 2.8          | 2.4   | 2.4   | 2.4     | 2.5   | 1.1k     | 2.5k  | 880   | 690     | 5.3k  |
| Trinidad and Tobago              | 6.1           |       | 7.4   | 8.5     | 6.2   | 2.5          |       | 2.3   | 2.3     | 2.5   | 28k      |       | 750   | 470     | 30k   |
| Ireland                          | 5.0           | 6.4   | 7.7   | 7.6     | 5.9   | 2.7          | 2.5   | 2.4   | 2.4     | 2.6   | 57k      | 22k   | 17k   | 19k     | 120k  |
| Barbados                         | 6.1           |       | 7.2   | 7.6     | 6.4   | 2.5          |       | 2.4   | 2.3     | 2.4   | 9.3k     |       | 960   | 2k      | 13k   |
| Gabon                            | 5.5           | 5.8   | 5.8   | 7.2     | 5.9   | 2.6          | 2.5   | 2.5   | 2.4     | 2.5   | 3.3k     | 8.1k  | 2.3k  | 500     | 15k   |
| Liberia                          | 6.2           | 7.7   | 7.6   | 7.1     | 6.9   | 2.6          | 2.4   | 2.4   | 2.4     | 2.5   | 13k      | 2.4k  | 2.4k  | 3k      | 22k   |
| Panama                           | 3.2           | 4.7   | 6.1   | 6.8     | 4.6   | 3.0          | 2.8   | 2.6   | 2.5     | 2.8   | 15k      | 9.3k  | 7.1k  | 4.8k    | 37k   |
| Montenegro                       | 3.4           | 5.0   | 5.9   | 6.7     | 4.5   | 2.9          | 2.6   | 2.5   | 2.3     | 2.7   | 3.7k     | 3.7k  | 310   | 340     | 8.6k  |
| Lebanon                          | 2.1           | 5.5   | 6.3   | 6.7     | 3.9   | 3.0          | 2.6   | 2.5   | 2.5     | 2.7   | 17k      | 18k   | 4k    | 3.9k    | 45k   |
| Jamaica                          | 5.2           | 6.3   | 6.3   | 6.6     | 5.6   | 2.6          | 2.5   | 2.5   | 2.5     | 2.6   | 19k      | 5.5k  | 3.8k  | 3.2k    | 33k   |
| Papua New Guinea                 | 6.0           | 5.5   | 7.1   | 6.6     | 6.5   | 2.6          | 2.6   | 2.4   | 2.7     | 2.6   | 3.7k     | 870   | 270   | 250     | 6.2k  |
| Kosovo                           | 5.5           | 6.8   | 7.1   | 6.6     | 6.4   | 2.5          | 2.3   | 2.3   | 2.4     | 2.3   | 14k      | 18k   | 2.3k  | 3.5k    | 41k   |
| Cyprus                           | 2.8           | 4.0   | 5.6   | 6.5     | 4.2   | 2.8          | 2.7   | 2.6   | 2.5     | 2.7   | 6.7k     | 26k   | 4.8k  | 2.9k    | 41k   |
| Brunei Darussalam                | 6.1           | 7.4   | 7.0   | 6.5     | 6.7   | 2.5          | 2.3   | 2.4   | 2.5     | 2.4   | 6.2k     | 5.3k  | 1.5k  | 610     | 14k   |
| Guatemala                        | 3.2           | 4.7   | 6.1   | 6.5     | 4.6   | 3.0          | 2.9   | 2.7   | 2.7     | 2.9   | 32k      | 41k   | 12k   | 11k     | 110k  |
| Bahamas, The                     | 4.8           | 4.5   | 6.2   | 6.3     | 4.8   | 2.7          | 2.8   | 2.6   | 2.6     | 2.7   | 4.8k     | 3.1k  | 630   | 320     | 9.2k  |
| <b>Thailand</b>                  | 4.0           | 4.7   | 4.8   | 6.3     | 4.9   | 2.8          | 2.8   | 2.7   | 2.6     | 2.7   | 140k     | 470k  | 74k   | 120k    | 920k  |
| Sierra Leone                     | 4.5           | 6.6   | 6.0   | 6.2     | 5.7   | 2.7          | 2.5   | 2.5   | 2.5     | 2.6   | 8.7k     | 3.2k  | 2.6k  | 9k      | 25k   |
| <b>Philippines</b>               | 4.5           | 5.3   | 5.6   | 6.1     | 5.4   | 3.0          | 2.8   | 2.8   | 2.8     | 2.8   | 130k     | 200k  | 51k   | 59k     | 500k  |
| Macedonia, FYR                   | 4.0           | 4.7   | 5.3   | 6.1     | 4.6   | 2.7          | 2.6   | 2.5   | 2.4     | 2.6   | 9k       | 24k   | 1.3k  | 800     | 36k   |
| Norway                           | 4.0           | 4.8   | 5.7   | 6.1     | 4.6   | 2.9          | 2.7   | 2.6   | 2.6     | 2.8   | 62k      | 57k   | 10k   | 19k     | 170k  |
| <b>Madagascar</b>                | 4.1           | 4.6   | 7.3   | 6.0     | 5.3   | 3.1          | 2.8   | 2.6   | 2.6     | 2.7   | 5.8k     | 8.7k  | 1.6k  | 2.1k    | 39k   |
| <b>Sri Lanka</b>                 | 3.8           | 5.9   | 5.4   | 5.9     | 5.5   | 2.7          | 2.5   | 2.6   | 2.5     | 2.5   | 22k      | 78k   | 8k    | 26k     | 150k  |
| <b>Indonesia</b>                 | 5.3           | 4.4   | 5.3   | 5.8     | 5.1   | 2.7          | 2.7   | 2.7   | 2.6     | 2.7   | 660k     | 470k  | 140k  | 220k    | 1.6M  |
| <b>Korea, Dem. People's Rep.</b> | 5.1           | 6.1   | 5.1   | 5.8     | 5.4   | 2.6          | 2.5   | 2.6   | 2.5     | 2.6   | 39k      | 7.2k  | 2.2k  | 2.8k    | 58k   |
| Serbia                           | 3.0           | 4.3   | 5.3   | 5.8     | 3.8   | 2.9          | 2.7   | 2.5   | 2.5     | 2.8   | 56k      | 32k   | 4.1k  | 4.7k    | 100k  |
| Bosnia and Herzegovina           | 3.9           | 5.3   | 4.9   | 5.7     | 4.8   | 2.8          | 2.6   | 2.6   | 2.5     | 2.6   | 19k      | 17k   | 1.7k  | 2k      | 42k   |

|                           | Sprawl (SNDi) |       |       |         |       | Nodal degree |       |       |         |       | N(nodes) |       |       |         |       |
|---------------------------|---------------|-------|-------|---------|-------|--------------|-------|-------|---------|-------|----------|-------|-------|---------|-------|
|                           | <1975         | 75-89 | 90-99 | 2000-13 | Stock | <1975        | 75-89 | 90-99 | 2000-13 | Stock | <1975    | 75-89 | 90-99 | 2000-13 | Stock |
| <b>United States</b>      | 2.9           | 4.6   | 6.2   | 5.7     | 3.9   | 3.0          | 2.8   | 2.6   | 2.7     | 2.9   | 5.5M     | 2.7M  | 980k  | 1.1M    | 11M   |
| <b>Malaysia</b>           | 4.5           | 5.6   | 5.2   | 5.7     | 4.9   | 2.9          | 2.7   | 2.8   | 2.8     | 2.8   | 270k     | 49k   | 47k   | 45k     | 420k  |
| Albania                   | 4.7           | 4.6   | 5.4   | 5.7     | 4.9   | 2.6          | 2.7   | 2.6   | 2.5     | 2.6   | 8.3k     | 21k   | 5.6k  | 2.6k    | 41k   |
| Costa Rica                | 4.4           | 5.1   | 5.1   | 5.7     | 4.7   | 2.8          | 2.7   | 2.6   | 2.6     | 2.7   | 35k      | 17k   | 3.9k  | 2.6k    | 61k   |
| El Salvador               | 3.4           | 4.3   | 5.1   | 5.7     | 4.3   | 2.9          | 2.8   | 2.7   | 2.6     | 2.8   | 16k      | 30k   | 10k   | 6.6k    | 66k   |
| West Bank and Gaza        | 2.9           | 4.4   | 5.2   | 5.4     | 4.5   | 2.9          | 2.6   | 2.6   | 2.5     | 2.6   | 8.3k     | 29k   | 9.4k  | 6.2k    | 55k   |
| New Zealand               | 3.7           |       | 5.6   | 5.2     | 4.0   | 2.8          |       | 2.6   | 2.7     | 2.8   | 75k      |       | 4.9k  | 5k      | 96k   |
| <b>Ghana</b>              | 3.7           | 4.4   | 5.0   | 5.2     | 4.6   | 2.8          | 2.7   | 2.6   | 2.6     | 2.7   | 39k      | 25k   | 26k   | 36k     | 130k  |
| Slovenia                  | 4.2           | 5.5   | 5.5   | 5.1     | 4.5   | 2.7          | 2.5   | 2.6   | 2.6     | 2.6   | 40k      | 16k   | 1.1k  | 2.5k    | 61k   |
| <b>Bangladesh</b>         | 4.2           | 5.1   | 5.1   | 5.1     | 5.3   | 2.7          | 2.7   | 2.6   | 2.6     | 2.6   | 16k      | 36k   | 7.7k  | 26k     | 160k  |
| <b>Venezuela, RB</b>      | 3.3           |       | 4.1   | 5.1     | 3.4   | 3.0          |       | 2.9   | 2.8     | 3.0   | 240k     |       | 23k   | 15k     | 290k  |
| Libya                     | 1.7           | 2.4   | 4.1   | 5.1     | 2.3   | 3.1          | 3.0   | 2.8   | 2.7     | 3.0   | 46k      | 25k   | 5.2k  | 8.5k    | 86k   |
| Guinea                    | 2.5           | 3.6   | 4.0   | 5.0     | 4.0   | 3.0          | 2.9   | 2.8   | 2.7     | 2.8   | 13k      | 12k   | 8k    | 14k     | 52k   |
| <b>Cameroon</b>           | 3.7           | 3.7   | 5.0   | 5.0     | 4.5   | 2.9          | 2.8   | 2.6   | 2.6     | 2.7   | 36k      | 34k   | 34k   | 28k     | 150k  |
| Honduras                  | 2.3           | 3.3   | 3.8   | 4.9     | 3.4   | 3.2          | 3.1   | 3.0   | 2.8     | 3.1   | 23k      | 21k   | 18k   | 9.4k    | 75k   |
| Congo, Rep.               | 2.0           | 2.7   | 3.8   | 4.9     | 2.7   | 3.2          | 3.0   | 2.9   | 2.7     | 3.1   | 33k      | 6k    | 5.5k  | 8.1k    | 53k   |
| <b>Ukraine</b>            | 2.6           | 3.3   | 4.3   | 4.9     | 3.4   | 3.0          | 2.9   | 2.7   | 2.6     | 2.8   | 230k     | 370k  | 37k   | 28k     | 760k  |
| Slovak Republic           | 2.8           | 4.2   | 5.1   | 4.8     | 3.5   | 2.9          | 2.6   | 2.5   | 2.6     | 2.8   | 58k      | 39k   | 3.3k  | 5k      | 110k  |
| Suriname                  | 3.1           |       | 4.9   | 4.8     | 3.2   | 2.9          |       | 2.7   | 2.7     | 2.9   | 8.4k     |       | 270   | 570     | 9.4k  |
| <b>Romania</b>            | 2.7           | 3.7   | 4.6   | 4.7     | 3.4   | 2.9          | 2.7   | 2.6   | 2.6     | 2.7   | 150k     | 160k  | 17k   | 24k     | 370k  |
| Switzerland               | 1.8           | 3.8   | 4.7   | 4.7     | 2.6   | 3.1          | 2.8   | 2.7   | 2.6     | 3.0   | 120k     | 68k   | 6.2k  | 7k      | 210k  |
| <b>United Kingdom</b>     | 3.8           | 5.2   | 5.8   | 4.7     | 4.1   | 2.7          | 2.5   | 2.5   | 2.6     | 2.7   | 1.3M     | 240k  | 42k   | 44k     | 1.6M  |
| Georgia                   | 3.8           | 4.1   | 5.1   | 4.7     | 4.1   | 2.7          | 2.7   | 2.5   | 2.6     | 2.7   | 54k      | 27k   | 2.8k  | 2.2k    | 95k   |
| <b>Russian Federation</b> | 2.4           | 3.4   | 4.4   | 4.7     | 3.7   | 3.1          | 2.9   | 2.8   | 2.8     | 2.9   | 620k     | 600k  | 140k  | 100k    | 1.9M  |
| <b>Cote d'Ivoire</b>      | 2.8           | 2.8   | 4.2   | 4.7     | 3.3   | 3.0          | 2.9   | 2.7   | 2.6     | 2.9   | 51k      | 9.6k  | 7k    | 8.4k    | 79k   |
| Bahrain                   | 2.1           | 2.7   | 3.5   | 4.7     | 2.5   | 3.1          | 3.0   | 2.9   | 2.9     | 3.0   | 17k      | 11k   | 1.6k  | 690     | 30k   |
| Armenia                   | 3.4           | 3.8   | 3.9   | 4.7     | 3.8   | 2.9          | 2.8   | 2.8   | 2.7     | 2.8   | 21k      | 17k   | 2.6k  | 1.4k    | 46k   |
| Haiti                     | 3.6           | 4.6   | 5.1   | 4.6     | 4.6   | 3.0          | 2.7   | 2.7   | 2.7     | 2.7   | 10k      | 12k   | 3.4k  | 7.1k    | 40k   |
| <b>Vietnam</b>            | 3.9           | 4.2   | 4.4   | 4.6     | 4.4   | 2.8          | 2.7   | 2.8   | 2.8     | 2.8   | 67k      | 99k   | 28k   | 68k     | 290k  |
| Lao PDR                   | 3.3           | 3.7   | 4.5   | 4.4     | 4.0   | 2.8          | 2.7   | 2.7   | 2.7     | 2.7   | 4.7k     | 4.8k  | 2.4k  | 2.5k    | 18k   |
| Israel                    | 2.0           | 3.2   | 4.4   | 4.4     | 3.3   | 3.1          | 2.9   | 2.8   | 2.8     | 2.9   | 17k      | 53k   | 16k   | 12k     | 99k   |
| Nicaragua                 | 1.6           | 2.5   | 3.7   | 4.4     | 2.8   | 3.3          | 3.1   | 2.9   | 2.8     | 3.0   | 17k      | 14k   | 7.6k  | 6.2k    | 49k   |
| Croatia                   | 3.1           | 4.4   | 5.1   | 4.3     | 3.7   | 2.9          | 2.6   | 2.6   | 2.7     | 2.7   | 46k      | 32k   | 2.7k  | 2.7k    | 87k   |
| Azerbaijan                | 4.8           | 4.5   | 4.4   | 4.3     | 4.6   | 2.6          | 2.7   | 2.7   | 2.7     | 2.6   | 39k      | 53k   | 7k    | 20k     | 130k  |

|                         | Sprawl (SNDi) |       |       |         |       | Nodal degree |       |       |         |       | N(nodes) |       |       |         |       |
|-------------------------|---------------|-------|-------|---------|-------|--------------|-------|-------|---------|-------|----------|-------|-------|---------|-------|
|                         | <1975         | 75-89 | 90-99 | 2000-13 | Stock | <1975        | 75-89 | 90-99 | 2000-13 | Stock | <1975    | 75-89 | 90-99 | 2000-13 | Stock |
| <b>India</b>            | 3.2           | 3.3   | 3.8   | 4.3     | 3.7   | 2.9          | 2.9   | 2.8   | 2.7     | 2.8   | 510k     | 740k  | 320k  | 550k    | 2.4M  |
| Bulgaria                | 1.6           | 1.7   | 4.1   | 4.2     | 1.8   | 3.1          | 3.0   | 2.7   | 2.7     | 3.0   | 98k      | 110k  | 4.2k  | 4k      | 230k  |
| <b>Uganda</b>           | 4.2           | 3.4   | 3.9   | 4.2     | 4.7   | 2.7          | 2.8   | 2.8   | 2.7     | 2.6   | 11k      | 4.4k  | 11k   | 15k     | 120k  |
| <b>South Africa</b>     | 3.0           | 3.8   | 3.7   | 4.2     | 3.6   | 3.0          | 2.9   | 2.9   | 2.8     | 2.9   | 170k     | 240k  | 110k  | 110k    | 660k  |
| Austria                 | 2.5           | 3.4   | 4.6   | 4.2     | 2.9   | 3.0          | 2.8   | 2.7   | 2.7     | 2.9   | 150k     | 76k   | 13k   | 13k     | 260k  |
| Lithuania               | 1.6           | 2.7   | 3.7   | 4.2     | 2.9   | 3.2          | 3.0   | 2.8   | 2.8     | 2.9   | 16k      | 15k   | 3.6k  | 1.9k    | 57k   |
| <b>Nepal</b>            | 3.8           | 3.2   | 2.9   | 4.1     | 4.0   | 2.8          | 2.8   | 2.9   | 2.7     | 2.7   | 19k      | 9.6k  | 3.6k  | 5.3k    | 63k   |
| Denmark                 | 2.5           | 3.1   | 3.6   | 4.1     | 2.9   | 2.9          | 2.8   | 2.8   | 2.7     | 2.9   | 130k     | 77k   | 9.7k  | 19k     | 240k  |
| Jordan                  | 2.8           | 2.6   | 3.5   | 4.1     | 3.0   | 3.0          | 3.0   | 2.8   | 2.8     | 2.9   | 5.4k     | 56k   | 13k   | 11k     | 93k   |
| <b>Italy</b>            | 2.2           | 3.5   | 4.0   | 4.1     | 2.8   | 3.0          | 2.8   | 2.8   | 2.7     | 2.9   | 790k     | 580k  | 60k   | 74k     | 1.5M  |
| <b>Australia</b>        | 2.7           | 4.5   | 5.3   | 4.1     | 3.5   | 3.0          | 2.7   | 2.6   | 2.8     | 2.9   | 380k     | 220k  | 42k   | 64k     | 710k  |
| <b>Poland</b>           | 1.9           | 3.0   | 3.9   | 4.0     | 2.6   | 3.1          | 2.9   | 2.7   | 2.7     | 2.9   | 230k     | 210k  | 25k   | 39k     | 530k  |
| <b>Tanzania</b>         | 3.0           | 2.4   | 3.8   | 4.0     | 3.5   | 2.9          | 2.9   | 2.8   | 2.8     | 2.8   | 25k      | 13k   | 20k   | 31k     | 110k  |
| <b>France</b>           | 2.3           | 3.6   | 3.9   | 4.0     | 2.9   | 3.0          | 2.8   | 2.7   | 2.7     | 2.9   | 1.1M     | 780k  | 140k  | 150k    | 2.2M  |
| Czech Republic          | 2.0           | 3.2   | 3.7   | 4.0     | 2.6   | 3.0          | 2.8   | 2.7   | 2.7     | 2.9   | 150k     | 89k   | 7.4k  | 15k     | 270k  |
| <b>Mexico</b>           | 1.7           | 2.4   | 3.1   | 3.9     | 2.6   | 3.2          | 3.1   | 3.0   | 3.0     | 3.1   | 430k     | 760k  | 240k  | 280k    | 1.9M  |
| Mongolia                | 3.4           | 4.2   | 4.6   | 3.9     | 3.7   | 2.8          | 2.7   | 2.8   | 2.8     | 2.8   | 1.5k     | 6.5k  | 830   | 3.4k    | 27k   |
| Finland                 | 2.0           | 2.8   | 3.5   | 3.9     | 3.1   | 3.2          | 3.0   | 2.9   | 2.9     | 2.9   | 54k      | 40k   | 11k   | 15k     | 160k  |
| Mauritius               | 2.9           |       |       | 3.9     | 3.0   | 2.9          |       |       | 2.8     | 2.8   | 17k      |       |       | 3k      | 21k   |
| Estonia                 | 1.5           | 2.4   | 4.1   | 3.9     | 2.6   | 3.2          | 3.0   | 2.8   | 2.9     | 3.0   | 12k      | 9.6k  | 1.2k  | 1.5k    | 33k   |
| Hong Kong SAR,<br>China | 1.1           | 2.1   | 1.5   | 3.9     | 1.4   | 3.3          | 3.2   | 3.4   | 3.1     | 3.3   | 7.5k     | 3k    | 530   | 130     | 11k   |
| <b>Uzbekistan</b>       | 3.2           | 3.1   | 3.9   | 3.9     | 3.5   | 2.9          | 2.9   | 2.8   | 2.7     | 2.8   | 78k      | 65k   | 13k   | 18k     | 210k  |
| Cambodia                | 2.3           | 2.8   | 3.2   | 3.9     | 3.3   | 3.1          | 2.9   | 2.9   | 2.9     | 2.9   | 2.5k     | 11k   | 4.4k  | 12k     | 41k   |
| Tajikistan              | 3.8           | 3.3   | 3.5   | 3.8     | 4.0   | 2.8          | 2.9   | 2.8   | 2.8     | 2.8   | 9.9k     | 8.3k  | 1.5k  | 4.1k    | 33k   |
| Dominican Republic      | 1.7           | 3.1   | 2.8   | 3.7     | 2.7   | 3.2          | 3.0   | 3.0   | 2.9     | 3.0   | 35k      | 43k   | 20k   | 12k     | 110k  |
| Malawi                  | 3.8           | 3.6   | 3.9   | 3.7     | 3.7   | 2.8          | 2.8   | 2.7   | 2.7     | 2.8   | 11k      | 6.1k  | 6.6k  | 23k     | 58k   |
| Portugal                | 2.8           | 3.2   | 3.8   | 3.7     | 3.1   | 3.0          | 2.9   | 2.8   | 2.8     | 2.9   | 170k     | 140k  | 45k   | 33k     | 390k  |
| Moldova                 | 2.3           | 2.7   | 3.1   | 3.7     | 2.6   | 2.9          | 2.9   | 2.8   | 2.7     | 2.9   | 29k      | 54k   | 2.6k  | 1.4k    | 88k   |
| <b>Myanmar</b>          | 2.8           | 2.8   | 2.0   | 3.7     | 3.0   | 3.0          | 3.0   | 3.1   | 2.9     | 2.9   | 30k      | 49k   | 29k   | 35k     | 180k  |
| Hungary                 | 1.6           | 2.8   | 3.5   | 3.6     | 2.3   | 3.1          | 2.9   | 2.8   | 2.7     | 2.9   | 120k     | 86k   | 8.8k  | 11k     | 230k  |
| Sweden                  | 2.0           | 3.1   | 3.6   | 3.6     | 2.6   | 3.1          | 2.9   | 2.9   | 2.9     | 3.0   | 170k     | 61k   | 11k   | 15k     | 300k  |
| Greece                  | 0.9           | 2.4   | 3.2   | 3.6     | 1.5   | 3.2          | 2.9   | 2.8   | 2.8     | 3.1   | 200k     | 140k  | 13k   | 11k     | 380k  |
| Malta                   | 1.0           | 1.9   | 3.1   | 3.6     | 1.7   | 3.3          | 3.1   | 2.9   | 2.8     | 3.1   | 4.5k     | 7.2k  | 290   | 580     | 13k   |
| <b>Kenya</b>            | 4.5           | 4.1   | 4.9   | 3.6     | 4.1   | 2.8          | 2.8   | 2.7   | 2.8     | 2.7   | 3.2k     | 12k   | 7.5k  | 20k     | 58k   |

|                             | Sprawl (SNDi) |       |       |         |       | Nodal degree |       |       |         |       | N(nodes) |       |       |         |       |
|-----------------------------|---------------|-------|-------|---------|-------|--------------|-------|-------|---------|-------|----------|-------|-------|---------|-------|
|                             | <1975         | 75-89 | 90-99 | 2000-13 | Stock | <1975        | 75-89 | 90-99 | 2000-13 | Stock | <1975    | 75-89 | 90-99 | 2000-13 | Stock |
| <b>Afghanistan</b>          | 5.6           | 3.8   | 5.3   | 3.6     | 4.8   | 2.6          | 2.8   | 2.6   | 3.0     | 2.7   | 6k       | 13k   | 2.1k  | 8.3k    | 97k   |
| Central African Republic    | 2.9           | 3.7   | 3.9   | 3.6     | 3.6   | 3.0          | 3.0   | 3.0   | 3.0     | 3.0   | 5.3k     | 1.3k  | 2.3k  | 1.5k    | 12k   |
| <b>Canada</b>               | 2.2           | 3.2   | 3.7   | 3.5     | 2.7   | 3.1          | 3.0   | 2.9   | 3.0     | 3.0   | 370k     | 190k  | 49k   | 66k     | 720k  |
| Rwanda                      | 2.5           | 3.4   | 3.5   | 3.5     | 3.7   | 3.0          | 2.9   | 2.9   | 2.9     | 2.8   | 470      | 3.6k  | 1.2k  | 7.3k    | 15k   |
| Belgium                     | 1.6           | 2.8   | 3.4   | 3.5     | 2.2   | 3.1          | 2.9   | 2.8   | 2.7     | 3.0   | 160k     | 93k   | 15k   | 18k     | 290k  |
| Latvia                      | 1.5           | 2.3   | 3.7   | 3.5     | 2.6   | 3.2          | 3.0   | 2.8   | 2.9     | 2.9   | 14k      | 13k   | 2.2k  | 1.5k    | 46k   |
| Kazakhstan                  | 2.9           | 2.5   | 3.2   | 3.5     | 3.0   | 3.0          | 3.1   | 3.0   | 3.0     | 3.0   | 33k      | 64k   | 9.4k  | 15k     | 150k  |
| Zambia                      | 2.4           | 2.9   | 3.3   | 3.5     | 3.3   | 3.0          | 3.0   | 2.9   | 2.9     | 2.9   | 27k      | 9.7k  | 4k    | 15k     | 73k   |
| <b>Congo, Dem. Rep.</b>     | 3.0           | 3.2   | 3.3   | 3.5     | 3.6   | 3.1          | 3.1   | 3.0   | 2.9     | 2.9   | 86k      | 55k   | 36k   | 63k     | 290k  |
| <b>Pakistan</b>             | 2.2           | 2.8   | 3.6   | 3.5     | 2.8   | 3.1          | 2.9   | 2.9   | 2.9     | 3.0   | 78k      | 78k   | 23k   | 53k     | 250k  |
| <b>Nigeria</b>              | 2.5           | 3.4   | 4.2   | 3.4     | 3.5   | 2.9          | 2.8   | 2.7   | 2.8     | 2.8   | 160k     | 260k  | 110k  | 430k    | 1.3M  |
| Chile                       | 2.0           | 2.6   | 3.2   | 3.4     | 2.6   | 3.1          | 3.0   | 2.9   | 2.9     | 3.0   | 130k     | 80k   | 46k   | 51k     | 320k  |
| Oman                        | 3.7           | 2.8   | 3.5   | 3.4     | 3.4   | 2.7          | 3.0   | 2.8   | 2.9     | 2.8   | 7.7k     | 11k   | 8.4k  | 7.6k    | 53k   |
| <b>Colombia</b>             | 1.6           | -0.1  | 2.8   | 3.4     | 1.8   | 3.2          | 3.3   | 3.0   | 2.9     | 3.2   | 290k     | 120   | 22k   | 23k     | 350k  |
| Zimbabwe                    | 2.5           | 3.0   | 3.4   | 3.4     | 3.1   | 3.0          | 2.9   | 2.9   | 2.9     | 2.9   | 8k       | 25k   | 14k   | 9.6k    | 66k   |
| <b>Egypt, Arab Rep.</b>     | 3.5           | 3.1   | 3.4   | 3.3     | 3.4   | 2.8          | 2.9   | 2.8   | 2.9     | 2.9   | 240k     | 110k  | 31k   | 54k     | 460k  |
| Togo                        | 2.1           | 2.0   | 2.3   | 3.3     | 2.6   | 3.0          | 3.0   | 3.0   | 2.8     | 2.9   | 14k      | 12k   | 8.1k  | 11k     | 53k   |
| Cuba                        | 0.9           | 2.2   | 2.7   | 3.3     | 1.4   | 3.3          | 3.0   | 2.9   | 2.8     | 3.1   | 60k      | 37k   | 3k    | 2.3k    | 100k  |
| Luxembourg                  | 2.0           | 2.9   | 3.2   | 3.2     | 2.4   | 3.1          | 2.9   | 2.9   | 2.8     | 3.0   | 8.3k     | 5.3k  | 1.3k  | 910     | 16k   |
| <b>Germany</b>              | 1.9           | 3.0   | 3.2   | 3.2     | 2.3   | 3.1          | 2.9   | 2.8   | 2.8     | 3.0   | 1.4M     | 640k  | 100k  | 110k    | 2.3M  |
| Benin                       | 1.3           | 2.1   | 2.3   | 3.2     | 2.5   | 3.1          | 3.0   | 3.0   | 2.8     | 2.9   | 12k      | 18k   | 15k   | 17k     | 68k   |
| Cabo Verde                  | 2.6           |       |       | 3.2     | 2.8   | 3.1          |       |       | 3.0     | 3.1   | 3.3k     |       |       | 480     | 5.7k  |
| Lesotho                     | 3.5           | 2.8   | 2.7   | 3.1     | 3.4   | 2.8          | 2.9   | 2.9   | 2.9     | 2.8   | 800      | 8.4k  | 9.1k  | 12k     | 43k   |
| <b>Yemen, Rep.</b>          | 3.3           | 2.2   | 3.4   | 3.1     | 3.3   | 3.0          | 3.1   | 3.0   | 3.0     | 3.0   | 4k       | 13k   | 3k    | 19k     | 48k   |
| Qatar                       | 2.4           | 3.0   | 3.2   | 3.1     | 2.9   | 3.1          | 3.0   | 3.0   | 3.0     | 3.0   | 7.5k     | 17k   | 1.6k  | 4.2k    | 33k   |
| Burundi                     | 2.4           | 3.2   | 3.7   | 3.1     | 3.3   | 3.2          | 2.9   | 2.9   | 2.9     | 2.9   | 1.5k     | 2.7k  | 2.7k  | 6.9k    | 20k   |
| Kyrgyz Republic             | 2.9           | 3.2   | 3.0   | 3.1     | 3.2   | 2.9          | 2.9   | 2.9   | 2.9     | 2.9   | 11k      | 17k   | 5.3k  | 13k     | 52k   |
| Namibia                     | 2.0           | 2.2   | 3.4   | 3.1     | 2.8   | 3.1          | 3.1   | 2.9   | 3.0     | 3.0   | 2.3k     | 5k    | 4k    | 3.9k    | 18k   |
| <b>Iran, Islamic Rep.</b>   | 3.5           | 2.7   | 3.0   | 2.9     | 3.0   | 2.7          | 2.9   | 2.9   | 2.9     | 2.9   | 210k     | 370k  | 79k   | 200k    | 950k  |
| <b>Syrian Arab Republic</b> | 1.3           | 1.8   | 2.3   | 2.9     | 1.7   | 3.1          | 3.1   | 2.9   | 2.9     | 3.0   | 81k      | 70k   | 12k   | 17k     | 190k  |
| <b>Brazil</b>               | 1.8           | 2.2   | 2.3   | 2.9     | 2.1   | 3.2          | 3.1   | 3.1   | 3.0     | 3.1   | 1.6M     | 820k  | 430k  | 280k    | 3.4M  |



|                      | Sprawl (SNDi) |       |       |         |       | Nodal degree |       |       |         |       | N(nodes) |       |       |         |       |
|----------------------|---------------|-------|-------|---------|-------|--------------|-------|-------|---------|-------|----------|-------|-------|---------|-------|
|                      | <1975         | 75-89 | 90-99 | 2000-13 | Stock | <1975        | 75-89 | 90-99 | 2000-13 | Stock | <1975    | 75-89 | 90-99 | 2000-13 | Stock |
| <b>Saudi Arabia</b>  | 2.0           | 2.3   | 2.8   | 2.8     | 2.9   | 3.2          | 3.1   | 3.1   | 3.1     | 3.1   | 58k      | 160k  | 40k   | 66k     | 420k  |
| <b>China</b>         | 2.9           | 3.0   | 2.7   | 2.8     | 3.1   | 3.0          | 3.0   | 3.1   | 3.1     | 3.0   | 340k     | 520k  | 220k  | 460k    | 1.9M  |
| Iceland              | 1.9           |       | 3.3   | 2.8     | 2.5   | 3.1          |       | 2.9   | 3.0     | 3.0   | 5.6k     |       | 960   | 2.4k    | 12k   |
| United Arab Emirates | 1.7           | 1.2   | 2.2   | 2.8     | 1.9   | 3.2          | 3.2   | 3.1   | 3.1     | 3.1   | 40k      | 11k   | 5.4k  | 9.3k    | 90k   |
| <b>Algeria</b>       | 2.5           | 2.1   | 2.1   | 2.8     | 2.3   | 3.0          | 3.1   | 3.1   | 3.0     | 3.0   | 35k      | 240k  | 63k   | 57k     | 410k  |
| Tunisia              | 1.7           | 2.0   | 1.9   | 2.7     | 1.9   | 3.1          | 3.0   | 3.1   | 3.0     | 3.0   | 37k      | 83k   | 21k   | 9.5k    | 150k  |
| <b>Ethiopia</b>      | 2.8           | 2.5   | 2.4   | 2.7     | 2.7   | 3.0          | 3.0   | 3.1   | 3.1     | 3.0   | 6.7k     | 23k   | 21k   | 99k     | 190k  |
| <b>Angola</b>        | 2.8           | 3.4   | 3.4   | 2.6     | 2.9   | 3.0          | 2.9   | 3.0   | 3.1     | 3.0   | 27k      | 24k   | 11k   | 59k     | 150k  |
| <b>Turkey</b>        | 1.6           | 1.5   | 2.1   | 2.6     | 1.9   | 3.1          | 3.1   | 3.1   | 3.0     | 3.1   | 260k     | 510k  | 150k  | 100k    | 1.1M  |
| Ecuador              | 2.0           |       | 2.5   | 2.6     | 2.2   | 3.1          |       | 3.1   | 3.1     | 3.1   | 150k     |       | 12k   | 17k     | 210k  |
| Belarus              | 1.8           | 2.2   | 2.7   | 2.6     | 2.8   | 3.2          | 3.0   | 3.0   | 3.0     | 2.9   | 39k      | 34k   | 8.6k  | 6.7k    | 160k  |
| <b>Spain</b>         | 1.2           | 2.1   | 2.6   | 2.6     | 1.8   | 3.2          | 3.0   | 3.0   | 3.0     | 3.1   | 580k     | 470k  | 130k  | 110k    | 1.4M  |
| Kuwait               | 2.7           | 4.1   | 3.1   | 2.5     | 3.0   | 3.2          | 3.2   | 3.2   | 3.2     | 3.2   | 20k      | 10k   | 2k    | 2.5k    | 37k   |
| Netherlands          | 1.5           | 2.2   | 2.2   | 2.5     | 1.9   | 3.2          | 3.1   | 3.1   | 3.0     | 3.1   | 260k     | 140k  | 52k   | 54k     | 500k  |
| Turkmenistan         | 1.9           | 2.3   | 2.1   | 2.4     | 2.4   | 3.2          | 3.1   | 3.1   | 3.1     | 3.1   | 5k       | 7.1k  | 2.7k  | 3.6k    | 26k   |
| <b>Korea, Rep.</b>   | 0.9           | 1.4   | 2.0   | 2.4     | 1.4   | 3.2          | 3.2   | 3.1   | 3.1     | 3.2   | 160k     | 120k  | 37k   | 37k     | 370k  |
| Gambia, The          | 0.5           | 1.5   | 1.6   | 2.3     | 1.4   | 3.2          | 3.1   | 3.1   | 2.9     | 3.1   | 5.7k     | 5.1k  | 4.8k  | 1.6k    | 19k   |
| <b>Iraq</b>          | 2.1           | 1.8   | 2.0   | 2.2     | 2.0   | 3.1          | 3.1   | 3.0   | 3.0     | 3.1   | 28k      | 150k  | 21k   | 110k    | 320k  |
| Botswana             | 1.8           | 2.3   | 2.7   | 2.2     | 2.2   | 3.0          | 3.0   | 2.9   | 3.0     | 3.0   | 4.3k     | 20k   | 14k   | 11k     | 71k   |
| Paraguay             | 1.1           | 1.5   | 1.6   | 2.1     | 1.4   | 3.3          | 3.2   | 3.2   | 3.2     | 3.2   | 34k      | 21k   | 9.8k  | 7.7k    | 89k   |
| <b>Morocco</b>       | 1.5           | 1.9   | 1.9   | 2.0     | 1.9   | 3.2          | 3.1   | 3.1   | 3.1     | 3.1   | 81k      | 86k   | 29k   | 59k     | 280k  |
| Uruguay              | -0.3          | 0.5   | 1.7   | 2.0     | 0.4   | 3.5          | 3.3   | 3.1   | 3.0     | 3.4   | 24k      | 29k   | 6.9k  | 2.9k    | 66k   |
| Mali                 | 0.7           | 1.0   | 1.5   | 1.9     | 1.5   | 3.3          | 3.2   | 3.2   | 3.1     | 3.2   | 7.8k     | 33k   | 8.8k  | 28k     | 89k   |
| Niger                | 0.2           | 0.6   | 1.3   | 1.8     | 1.4   | 3.3          | 3.3   | 3.2   | 3.2     | 3.2   | 4.2k     | 8.1k  | 4.5k  | 17k     | 46k   |
| <b>Sudan</b>         | 0.6           | 1.1   | 1.6   | 1.8     | 1.6   | 3.3          | 3.4   | 3.3   | 3.3     | 3.3   | 64k      | 52k   | 12k   | 92k     | 320k  |
| <b>Japan</b>         | 1.1           | 1.5   | 2.2   | 1.8     | 1.3   | 3.2          | 3.1   | 3.1   | 3.1     | 3.1   | 2.8M     | 990k  | 130k  | 110k    | 4M    |
| Taiwan, China        | 1.1           | 2.1   | 2.0   | 1.8     | 1.3   | 3.2          | 3.1   | 3.2   | 3.2     | 3.2   | 130k     | 12k   | 7.9k  | 7.5k    | 160k  |
| <b>Mozambique</b>    | 2.1           | 1.2   | 1.7   | 1.7     | 1.8   | 3.1          | 3.1   | 3.1   | 3.0     | 3.0   | 16k      | 33k   | 16k   | 38k     | 130k  |
| Senegal              | 0.9           | 1.2   | 1.3   | 1.6     | 1.5   | 3.3          | 3.3   | 3.2   | 3.1     | 3.2   | 30k      | 47k   | 19k   | 31k     | 150k  |
| South Sudan          | 0.9           | 0.6   | 2.4   | 1.6     | 1.9   | 3.4          | 3.4   | 3.4   | 3.3     | 3.3   | 2k       | 1.2k  | 1.1k  | 11k     | 21k   |
| Eritrea              | 3.6           | 2.6   | 3.0   | 1.6     | 2.6   | 3.0          | 3.1   | 3.1   | 3.2     | 3.1   | 2.2k     | 1.7k  | 630   | 2.4k    | 18k   |
| <b>Peru</b>          | 1.5           | 0.8   | 1.5   | 1.5     | 1.5   | 3.2          | 3.3   | 3.2   | 3.2     | 3.2   | 190k     | 11k   | 9.1k  | 23k     | 280k  |
| <b>Argentina</b>     | 0.2           | 0.5   | 1.1   | 1.5     | 0.6   | 3.5          | 3.4   | 3.3   | 3.3     | 3.4   | 300k     | 310k  | 84k   | 69k     | 820k  |
| Burkina Faso         | 0.6           | 1.3   | 1.4   | 1.5     | 1.5   | 3.3          | 3.2   | 3.2   | 3.1     | 3.1   | 16k      | 10k   | 12k   | 28k     | 74k   |
| Belize               | 1.4           | 2.1   | 2.8   | 1.5     | 2.2   | 3.1          | 3.1   | 3.0   | 3.1     | 3.0   | 2.7k     | 1.6k  | 2.1k  | 620     | 9k    |

|            | Sprawl (SNDi) |       |       |         |       | Nodal degree |       |       |         |       | N(nodes) |       |       |         |       |
|------------|---------------|-------|-------|---------|-------|--------------|-------|-------|---------|-------|----------|-------|-------|---------|-------|
|            | <1975         | 75-89 | 90-99 | 2000-13 | Stock | <1975        | 75-89 | 90-99 | 2000-13 | Stock | <1975    | 75-89 | 90-99 | 2000-13 | Stock |
| Bolivia    | 1.3           | 1.1   | 1.0   | 1.2     | 1.5   | 3.3          | 3.3   | 3.3   | 3.3     | 3.2   | 42k      | 34k   | 26k   | 36k     | 170k  |
| Singapore  | 1.9           |       | 1.3   | 1.1     | 1.9   | 3.3          |       | 3.4   | 3.5     | 3.3   | 17k      |       | 380   | 170     | 18k   |
| Chad       | 0.0           | 1.2   | 1.0   | 1.1     | 1.2   | 3.4          | 3.4   | 3.3   | 3.3     | 3.3   | 5.6k     | 3.1k  | 4.9k  | 12k     | 34k   |
| Somalia    | 0.9           | 0.9   | 1.6   | 1.0     | 1.1   | 3.4          | 3.3   | 3.3   | 3.3     | 3.3   | 16k      | 16k   | 4.7k  | 19k     | 60k   |
| Mauritania | 0.1           | 0.2   | 0.5   | 0.5     | 0.6   | 3.4          | 3.3   | 3.3   | 3.3     | 3.3   | 5.8k     | 3.5k  | 2.1k  | 4.1k    | 26k   |
| Maldives   | -0.6          |       |       | -0.3    | 0.7   | 3.3          |       |       | 3.3     | 3.0   | 440      |       |       | 280     | 7k    |

**F.6 Cities ranked by urban street-network sprawl (SNDi) of recent road development**

Table S2: Cities listed in order of their recent urban street-network sprawl (SNDi).

|                             | Sprawl (SNDi) |       |        |       | Nodal degree |       |        |       | N(nodes) |       |        |       |
|-----------------------------|---------------|-------|--------|-------|--------------|-------|--------|-------|----------|-------|--------|-------|
|                             | <1990         | 90-99 | '00-13 | Stock | <1990        | 90-99 | '00-13 | Stock | <1990    | 90-99 | '00-13 | Stock |
| Suva, FIJI                  | 3.5           | 8.4   | 10.4   | 8.2   | 2.9          | 2.3   | 2.1    | 2.4   | 150      | 1.4k  | 150    | 1.7k  |
| Caracas, VENEZUELA          | 4.9           | 10.4  | 10.1   | 5.3   | 2.8          | 2.3   | 2.3    | 2.8   | 11k      | 770   | 540    | 12k   |
| Bangkok, THAILAND           | 6.8           | 7.6   | 8.1    | 7.3   | 2.5          | 2.5   | 2.4    | 2.5   | 74k      | 30k   | 46k    | 150k  |
| Guatemala City, GUATEMALA   | 3.8           | 5.6   | 7.5    | 4.5   | 3.0          | 2.8   | 2.5    | 2.9   | 22k      | 7.3k  | 4.7k   | 34k   |
| Cebu City, PHILIPPINES      | 6.1           | 6.9   | 7.3    | 6.6   | 2.6          | 2.5   | 2.6    | 2.6   | 5.7k     | 2.3k  | 4.5k   | 12k   |
| Gorgan, IRAN                | 3.6           | 5.8   | 6.7    | 3.9   | 2.7          | 2.5   | 2.4    | 2.7   | 3.3k     | 470   | 240    | 4k    |
| Los Angeles, UNITED STATES  | 3.6           | 6.2   | 6.3    | 3.9   | 2.9          | 2.6   | 2.6    | 2.9   | 250k     | 26k   | 9.7k   | 290k  |
| Raleigh, UNITED STATES      | 4.8           | 5.4   | 6.3    | 5.6   | 2.8          | 2.7   | 2.5    | 2.6   | 11k      | 21k   | 19k    | 51k   |
| Palembang, INDONESIA        | 4.7           | 5.6   | 6.3    | 5.2   | 2.6          | 2.5   | 2.5    | 2.6   | 15k      | 19k   | 3.9k   | 39k   |
| New York, UNITED STATES     | 2.9           | 5.2   | 6.3    | 3.1   | 3.0          | 2.7   | 2.5    | 2.9   | 320k     | 42k   | 3.5k   | 360k  |
| San Salvador, EL SALVADOR   | 4.4           | 7.1   | 6.1    | 5.0   | 2.8          | 2.5   | 2.6    | 2.7   | 11k      | 1.7k  | 4.7k   | 17k   |
| Belgrade, SERBIA            | 2.9           | 6.6   | 6.0    | 4.2   | 3.0          | 2.3   | 2.4    | 2.7   | 9.1k     | 2.2k  | 4k     | 15k   |
| Tijuana, MEXICO             | 4.3           | 3.6   | 6.0    | 4.4   | 2.9          | 3.0   | 2.7    | 2.9   | 15k      | 9.2k  | 8.5k   | 33k   |
| Florianopolis, BRAZIL       | 2.9           | 5.9   | 5.9    | 4.1   | 2.9          | 2.5   | 2.6    | 2.8   | 7.2k     | 2.5k  | 3.2k   | 13k   |
| Pune, INDIA                 | 3.4           | 5.0   | 5.9    | 4.9   | 2.8          | 2.6   | 2.5    | 2.7   | 6.3k     | 15k   | 10k    | 31k   |
| Sao Paulo, BRAZIL           | 2.1           | 4.9   | 5.8    | 2.5   | 3.1          | 2.8   | 2.6    | 3.0   | 150k     | 23k   | 5.5k   | 180k  |
| Medan, INDONESIA            | 4.0           | 5.2   | 5.8    | 4.9   | 2.7          | 2.5   | 2.5    | 2.6   | 20k      | 29k   | 16k    | 64k   |
| Gainesville, UNITED STATES  | 3.0           | 6.4   | 5.6    | 3.8   | 3.1          | 2.7   | 2.8    | 3.0   | 3.9k     | 800   | 1.2k   | 5.8k  |
| Johannesburg, SOUTH AFRICA  | 2.9           | 4.1   | 5.5    | 3.8   | 3.0          | 2.9   | 2.8    | 2.9   | 63k      | 16k   | 30k    | 110k  |
| Dhaka, BANGLADESH           | 3.3           | 4.9   | 5.5    | 4.0   | 2.9          | 2.7   | 2.6    | 2.8   | 14k      | 5.5k  | 6.6k   | 26k   |
| Kolkata, INDIA              | 3.2           | 4.6   | 5.4    | 3.9   | 2.9          | 2.7   | 2.6    | 2.8   | 20k      | 10k   | 6.4k   | 36k   |
| Pematangsiantar, INDONESIA  | 3.2           | 4.6   | 5.4    | 3.7   | 2.9          | 2.8   | 2.6    | 2.9   | 1.5k     | 300   | 280    | 2.1k  |
| Ulaanbaatar, MONGOLIA       | 4.1           | 4.8   | 5.3    | 4.5   | 2.8          | 2.6   | 2.6    | 2.7   | 5.9k     | 1.4k  | 3.1k   | 10k   |
| Kampala, UGANDA             | 4.9           | 5.6   | 5.3    | 5.1   | 2.6          | 2.5   | 2.6    | 2.6   | 8.4k     | 3.8k  | 3.2k   | 15k   |
| Houston, UNITED STATES      | 2.9           | 5.1   | 5.3    | 3.9   | 3.1          | 2.8   | 2.8    | 2.9   | 88k      | 31k   | 45k    | 160k  |
| Philadelphia, UNITED STATES | 2.3           | 4.9   | 5.2    | 2.8   | 3.1          | 2.8   | 2.7    | 3.0   | 120k     | 25k   | 15k    | 160k  |
| Victoria, CANADA            | 2.9           | 4.6   | 5.2    | 3.3   | 2.9          | 2.7   | 2.8    | 2.9   | 6.6k     | 1.8k  | 450    | 8.8k  |
| Ho Chi Minh City, VIET NAM  | 1.8           | 4.2   | 5.2    | 4.6   | 3.2          | 2.8   | 2.6    | 2.7   | 6.1k     | 13k   | 45k    | 64k   |
| Manila, PHILIPPINES         | 3.9           | 5.1   | 5.1    | 4.4   | 3.0          | 2.9   | 2.9    | 2.9   | 62k      | 26k   | 29k    | 120k  |
| Sheffield, UNITED KINGDOM   | 3.4           | 5.1   | 5.1    | 3.5   | 2.8          | 2.5   | 2.5    | 2.7   | 29k      | 2.5k  | 810    | 32k   |
| Rawang, MALAYSIA            | 3.5           | 4.7   | 5.0    | 4.7   | 3.0          | 3.0   | 2.9    | 2.9   | 540      | 820   | 3.8k   | 5.1k  |
| Pokhara, NEPAL              | 3.2           | 4.5   | 5.0    | 3.6   | 2.7          | 2.6   | 2.5    | 2.7   | 1.8k     | 280   | 470    | 2.6k  |
| Baku, AZERBAIJAN            | 4.1           | 5.2   | 5.0    | 4.6   | 2.8          | 2.5   | 2.6    | 2.7   | 11k      | 7.4k  | 5.1k   | 23k   |

|                            | Sprawl (SNDi) |       |        |       | Nodal degree |       |        |       | N(nodes) |       |        |       |
|----------------------------|---------------|-------|--------|-------|--------------|-------|--------|-------|----------|-------|--------|-------|
|                            | <1990         | 90-99 | '00-13 | Stock | <1990        | 90-99 | '00-13 | Stock | <1990    | 90-99 | '00-13 | Stock |
| Lagos, NIGERIA             | 4.2           | 4.6   | 5.0    | 4.5   | 2.8          | 2.6   | 2.6    | 2.7   | 24k      | 22k   | 19k    | 65k   |
| Vijayawada, INDIA          | 2.8           | 4.1   | 4.9    | 3.2   | 3.0          | 2.7   | 2.6    | 2.9   | 6.9k     | 1.4k  | 730    | 9k    |
| Sialkot, PAKISTAN          | 2.7           | 4.9   | 4.9    | 4.0   | 3.0          | 2.6   | 2.6    | 2.8   | 1.6k     | 2.3k  | 320    | 4.3k  |
| Rajshahi, BANGLADESH       | 1.4           | 3.7   | 4.9    | 3.9   | 3.1          | 2.7   | 2.6    | 2.7   | 130      | 1.6k  | 710    | 2.4k  |
| Cirebon, INDONESIA         | 2.7           | 4.2   | 4.9    | 4.5   | 2.9          | 2.7   | 2.7    | 2.7   | 1.1k     | 2.3k  | 7.9k   | 11k   |
| Portland, UNITED STATES    | 3.0           | 4.9   | 4.8    | 3.4   | 3.0          | 2.7   | 2.7    | 2.9   | 51k      | 10k   | 6.1k   | 67k   |
| Cleveland, UNITED STATES   | 2.8           | 5.4   | 4.8    | 3.8   | 3.0          | 2.7   | 2.8    | 2.9   | 24k      | 9.5k  | 14k    | 47k   |
| Tyumen, RUSSIA             | 1.7           | 4.5   | 4.8    | 3.0   | 3.3          | 2.8   | 2.8    | 3.1   | 2.3k     | 920   | 1.2k   | 4.4k  |
| Mexico City, MEXICO        | 1.8           | 4.0   | 4.8    | 2.7   | 3.2          | 2.8   | 2.7    | 3.0   | 120k     | 32k   | 40k    | 190k  |
| Algiers, ALGERIA           | 3.9           | 3.8   | 4.7    | 4.1   | 2.9          | 2.9   | 2.8    | 2.9   | 12k      | 10k   | 8.9k   | 31k   |
| Minneapolis, UNITED STATES | 2.8           | 4.6   | 4.7    | 3.3   | 3.1          | 2.8   | 2.7    | 3.0   | 63k      | 14k   | 11k    | 88k   |
| Kaunas, LITHUANIA          | 2.2           | 5.3   | 4.7    | 2.7   | 3.2          | 2.7   | 2.8    | 3.1   | 3.2k     | 170   | 680    | 4k    |
| Coimbatore, INDIA          | 3.5           | 4.2   | 4.7    | 3.9   | 2.8          | 2.8   | 2.7    | 2.8   | 7.2k     | 5.3k  | 3.4k   | 16k   |
| Arusha, TANZANIA           | 1.4           | 4.5   | 4.7    | 3.6   | 3.1          | 2.6   | 2.7    | 2.8   | 270      | 400   | 250    | 910   |
| Manchester, UNITED KINGDOM | 4.0           | 5.2   | 4.6    | 4.0   | 2.7          | 2.5   | 2.6    | 2.7   | 71k      | 2.5k  | 220    | 74k   |
| Springfield, UNITED STATES | 3.0           | 4.7   | 4.6    | 3.7   | 2.9          | 2.8   | 2.7    | 2.9   | 9.6k     | 7.1k  | 2.2k   | 19k   |
| Mumbai, INDIA              | 3.3           | 4.3   | 4.6    | 3.7   | 2.9          | 2.8   | 2.7    | 2.8   | 23k      | 2.5k  | 8.4k   | 34k   |
| Astrakhan, RUSSIA          | 2.0           | 3.5   | 4.6    | 2.5   | 3.1          | 2.8   | 2.6    | 3.0   | 3.7k     | 2.4k  | 150    | 6.2k  |
| Toledo, UNITED STATES      | 2.1           | 4.2   | 4.6    | 2.8   | 3.2          | 2.9   | 2.8    | 3.0   | 9.9k     | 3.4k  | 2.8k   | 16k   |
| Kozhikode, INDIA           | 1.7           | 3.8   | 4.5    | 3.5   | 3.0          | 2.7   | 2.6    | 2.7   | 340      | 530   | 970    | 1.8k  |
| Parepare, INDONESIA        | 2.4           | 3.8   | 4.4    | 3.3   | 3.0          | 2.7   | 2.7    | 2.8   | 750      | 300   | 520    | 1.6k  |
| Guadalajara, MEXICO        | 1.7           | 3.8   | 4.4    | 2.5   | 3.2          | 3.0   | 2.9    | 3.1   | 46k      | 8.8k  | 21k    | 75k   |
| Chicago, UNITED STATES     | 2.6           | 4.6   | 4.4    | 2.9   | 3.1          | 2.8   | 2.8    | 3.0   | 170k     | 30k   | 13k    | 210k  |
| Jequie, BRAZIL             | 1.2           | 1.9   | 4.4    | 1.5   | 3.2          | 3.1   | 2.9    | 3.2   | 2.4k     | 840   | 240    | 3.4k  |
| Santiago, CHILE            | 1.5           | 2.1   | 4.4    | 1.9   | 3.1          | 3.1   | 2.9    | 3.1   | 66k      | 14k   | 13k    | 93k   |
| Cabimas, VENEZUELA         | 2.4           | 2.8   | 4.3    | 2.6   | 2.9          | 3.0   | 2.7    | 2.9   | 6.4k     | 1.3k  | 700    | 8.4k  |
| Tashkent, UZBEKISTAN       | 2.7           | 4.3   | 4.3    | 3.3   | 3.0          | 2.8   | 2.7    | 2.9   | 17k      | 8.6k  | 4.1k   | 30k   |
| Bacolod, PHILIPPINES       | 2.6           | 5.1   | 4.3    | 4.2   | 3.1          | 2.9   | 3.1    | 3.0   | 1.1k     | 1.7k  | 870    | 3.7k  |
| Ipoh, MALAYSIA             | 3.6           | 4.4   | 4.3    | 3.8   | 2.9          | 2.8   | 2.9    | 2.9   | 11k      | 3.3k  | 1.5k   | 16k   |
| Ahvaz, IRAN                | 1.8           | 3.7   | 4.3    | 2.4   | 3.2          | 2.8   | 2.8    | 3.1   | 9.2k     | 2.3k  | 1.8k   | 13k   |
| Killeen, UNITED STATES     | 2.7           | 3.5   | 4.3    | 3.4   | 3.0          | 2.9   | 2.8    | 2.9   | 4.1k     | 710   | 3.2k   | 8k    |
| Singrauli, INDIA           | 4.7           | 4.0   | 4.3    | 4.2   | 2.8          | 2.9   | 2.9    | 2.9   | 220      | 780   | 420    | 1.4k  |
| Accra, GHANA               | 3.3           | 3.5   | 4.2    | 3.9   | 2.9          | 2.8   | 2.7    | 2.8   | 7.9k     | 18k   | 31k    | 57k   |
| Sydney, AUSTRALIA          | 3.0           | 5.2   | 4.2    | 3.3   | 2.9          | 2.7   | 2.9    | 2.9   | 61k      | 7.8k  | 7.8k   | 76k   |
| Bogota, COLOMBIA           | 1.2           | 2.0   | 4.2    | 1.3   | 3.2          | 3.1   | 2.8    | 3.2   | 44k      | 4.7k  | 1.1k   | 50k   |
| Quito, ECUADOR             | 1.9           | 4.0   | 4.1    | 3.3   | 3.1          | 2.9   | 2.8    | 2.9   | 10k      | 6k    | 16k    | 32k   |

|                              | Sprawl (SNDi) |       |        |       | Nodal degree |       |        |       | N(nodes) |       |        |       |
|------------------------------|---------------|-------|--------|-------|--------------|-------|--------|-------|----------|-------|--------|-------|
|                              | <1990         | 90-99 | '00-13 | Stock | <1990        | 90-99 | '00-13 | Stock | <1990    | 90-99 | '00-13 | Stock |
| MOSCOW, RUSSIA               | 1.3           | 3.3   | 4.1    | 2.2   | 3.4          | 3.0   | 2.9    | 3.2   | 30k      | 11k   | 13k    | 54k   |
| Ibadan, NIGERIA              | 4.1           | 3.7   | 4.1    | 4.0   | 2.7          | 2.8   | 2.7    | 2.7   | 20k      | 12k   | 16k    | 47k   |
| Belo Horizonte, BRAZIL       | 1.5           | 3.7   | 4.1    | 1.8   | 3.2          | 2.9   | 2.9    | 3.2   | 42k      | 4.7k  | 2.8k   | 50k   |
| London, UNITED KINGDOM       | 3.3           | 4.3   | 4.1    | 3.4   | 2.8          | 2.7   | 2.7    | 2.8   | 150k     | 25k   | 2.8k   | 180k  |
| Saidpur, BANGLADESH          | 2.7           |       | 4.0    | 3.2   | 2.8          |       | 2.6    | 2.8   | 270      | 19    | 130    | 420   |
| Istanbul, TURKEY             | 1.0           | 1.6   | 4.0    | 1.5   | 3.2          | 3.2   | 2.8    | 3.2   | 76k      | 48k   | 21k    | 140k  |
| Warsaw, POLAND               | 1.5           | 2.5   | 4.0    | 2.2   | 3.3          | 3.0   | 2.7    | 3.1   | 17k      | 6.9k  | 5.3k   | 29k   |
| Curitiba, BRAZIL             | 1.8           | 3.0   | 4.0    | 2.4   | 3.2          | 3.0   | 2.8    | 3.1   | 23k      | 15k   | 6.8k   | 45k   |
| Sana, YEMEN                  | 1.1           | 2.5   | 4.0    | 1.5   | 3.2          | 3.0   | 2.8    | 3.1   | 9.2k     | 1.1k  | 1.1k   | 11k   |
| Tehran, IRAN                 | 2.4           | 3.5   | 3.9    | 2.6   | 3.0          | 2.9   | 2.8    | 2.9   | 63k      | 11k   | 7.7k   | 82k   |
| Hyderabad, INDIA             | 2.6           | 3.1   | 3.8    | 3.1   | 2.9          | 2.9   | 2.8    | 2.9   | 53k      | 41k   | 43k    | 140k  |
| Halle, GERMANY               | 1.1           | 2.9   | 3.8    | 1.5   | 3.3          | 3.0   | 2.8    | 3.2   | 2.9k     | 960   | 180    | 4.1k  |
| Modesto, UNITED STATES       | 3.1           | 3.6   | 3.7    | 3.4   | 2.9          | 2.8   | 2.8    | 2.8   | 7.3k     | 3.2k  | 2.6k   | 13k   |
| Rovno, UKRAINE               | 2.3           | 3.1   | 3.7    | 3.0   | 3.1          | 2.8   | 2.8    | 2.9   | 930      | 250   | 1.3k   | 2.5k  |
| Milan, ITALY                 | 1.9           | 3.6   | 3.7    | 2.9   | 3.1          | 2.8   | 2.7    | 2.9   | 58k      | 48k   | 31k    | 140k  |
| Lausanne, SWITZERLAND        | 1.3           | 2.7   | 3.7    | 1.8   | 3.4          | 3.1   | 2.8    | 3.2   | 2.6k     | 1.1k  | 290    | 4.1k  |
| Haikou, CHINA                | 2.8           | 2.6   | 3.7    | 3.0   | 3.1          | 3.1   | 2.9    | 3.0   | 1.2k     | 460   | 1k     | 2.6k  |
| Hong Kong, CHINA             | 0.7           | 1.7   | 3.7    | 0.9   | 3.4          | 3.3   | 3.0    | 3.4   | 5.1k     | 820   | 220    | 6.1k  |
| Auckland, NEW ZEALAND        | 3.2           | 4.0   | 3.7    | 3.3   | 2.9          | 2.9   | 3.0    | 2.9   | 17k      | 1.8k  | 1.7k   | 20k   |
| Osaka, JAPAN                 | 1.2           | 2.8   | 3.7    | 1.3   | 3.2          | 3.0   | 2.9    | 3.2   | 160k     | 12k   | 2.7k   | 180k  |
| Kabul, AFGHANISTAN           | 3.6           | 3.7   | 3.6    | 3.6   | 2.8          | 2.8   | 2.8    | 2.8   | 12k      | 1.9k  | 7k     | 21k   |
| Qom, IRAN                    | 1.9           | 2.3   | 3.6    | 2.2   | 3.1          | 3.1   | 2.9    | 3.0   | 7.2k     | 1.7k  | 2.2k   | 11k   |
| Malatya, TURKEY              | 1.1           | 2.6   | 3.6    | 1.6   | 3.2          | 3.0   | 2.8    | 3.1   | 3.8k     | 730   | 830    | 5.3k  |
| Jaipur, INDIA                | 2.6           | 3.1   | 3.6    | 3.1   | 3.0          | 2.9   | 2.8    | 2.9   | 8.6k     | 19k   | 13k    | 40k   |
| Nakuru, KENYA                | 1.8           | 3.5   | 3.5    | 2.5   | 3.1          | 2.9   | 2.8    | 3.0   | 820      | 180   | 650    | 1.6k  |
| Shymkent, KAZAKHSTAN         | 3.6           | 3.3   | 3.5    | 3.5   | 2.9          | 2.9   | 2.9    | 2.9   | 4.3k     | 830   | 4.4k   | 9.5k  |
| Kigali, RWANDA               | 3.0           | 3.3   | 3.5    | 3.3   | 3.0          | 2.9   | 2.9    | 2.9   | 980      | 1.9k  | 1.7k   | 4.6k  |
| Culiacan, MEXICO             | 0.7           | 2.0   | 3.5    | 1.5   | 3.4          | 3.2   | 3.0    | 3.3   | 8.2k     | 3.6k  | 3.5k   | 15k   |
| Beira, MOZAMBIQUE            | 2.5           | 4.5   | 3.5    | 3.2   | 3.0          | 2.9   | 2.8    | 2.9   | 1.3k     | 110   | 2k     | 3.4k  |
| Tangshan, CHINA              | 2.9           | 3.1   | 3.4    | 3.3   | 3.0          | 3.0   | 2.8    | 2.9   | 1.7k     | 870   | 3.1k   | 5.6k  |
| Tel Aviv, ISRAEL             | 1.1           | 2.5   | 3.4    | 2.0   | 3.2          | 3.1   | 3.0    | 3.1   | 9.6k     | 14k   | 4.2k   | 28k   |
| Hindupur, INDIA              |               |       | 3.4    | 2.7   |              |       | 3.0    | 3.0   | 32       | 42    | 250    | 320   |
| Myeik, MYANMAR               | 1.9           | 3.3   | 3.3    | 2.4   | 3.1          | 2.8   | 2.8    | 3.0   | 720      | 140   | 500    | 1.4k  |
| Palermo, ITALY               | 2.2           | 6.4   | 3.3    | 2.6   | 3.0          | 2.5   | 2.8    | 2.9   | 7.1k     | 220   | 3.5k   | 11k   |
| Montreal, CANADA             | 1.8           | 3.5   | 3.3    | 1.9   | 3.3          | 3.0   | 3.1    | 3.2   | 45k      | 2.4k  | 4.7k   | 52k   |
| Port Elizabeth, SOUTH AFRICA | 2.3           | 4.2   | 3.3    | 2.7   | 3.0          | 2.8   | 3.0    | 3.0   | 9.1k     | 990   | 6.3k   | 16k   |

|                          | Sprawl (SNDi) |       |        |       | Nodal degree |       |        |       | N(nodes) |       |        |       |
|--------------------------|---------------|-------|--------|-------|--------------|-------|--------|-------|----------|-------|--------|-------|
|                          | <1990         | 90-99 | '00-13 | Stock | <1990        | 90-99 | '00-13 | Stock | <1990    | 90-99 | '00-13 | Stock |
| Paris, FRANCE            | 1.8           | 3.0   | 3.3    | 2.0   | 3.1          | 2.9   | 2.8    | 3.1   | 120k     | 13k   | 11k    | 140k  |
| Alexandria, EGYPT        | 0.7           | 2.3   | 3.3    | 1.1   | 3.3          | 3.0   | 2.9    | 3.2   | 8.2k     | 1.2k  | 1.8k   | 11k   |
| Antwerp, BELGIUM         | 1.5           | 2.8   | 3.2    | 1.9   | 3.2          | 2.9   | 2.8    | 3.1   | 16k      | 6.2k  | 1.1k   | 23k   |
| Ahmedabad, INDIA         | 2.5           | 3.5   | 3.2    | 2.7   | 3.0          | 2.8   | 2.9    | 2.9   | 8.9k     | 1.5k  | 1.5k   | 12k   |
| Saint Petersburg, RUSSIA | 0.5           | 3.4   | 3.2    | 1.9   | 3.6          | 2.9   | 3.0    | 3.3   | 9.6k     | 3.6k  | 6.8k   | 20k   |
| Palmas, BRAZIL           | 3.1           | 3.5   | 3.2    | 3.3   | 3.1          | 2.9   | 3.1    | 3.0   | 1.2k     | 3k    | 1.1k   | 5.3k  |
| Lahore, PAKISTAN         | 2.3           | 2.8   | 3.2    | 2.5   | 3.0          | 2.9   | 3.0    | 3.0   | 25k      | 6k    | 8.7k   | 40k   |
| Oyo, NIGERIA             | 3.4           | 3.4   | 3.2    | 3.3   | 2.7          | 2.8   | 2.8    | 2.8   | 1.5k     | 780   | 2.3k   | 4.5k  |
| Kinshasa, DR CONGO       | 2.1           | 3.2   | 3.2    | 2.7   | 3.2          | 3.0   | 2.9    | 3.1   | 19k      | 13k   | 15k    | 46k   |
| Shanghai, CHINA          | 1.6           | 2.9   | 3.1    | 2.1   | 3.3          | 3.1   | 3.1    | 3.2   | 22k      | 10k   | 4.3k   | 36k   |
| Zunyi, CHINA             | 3.6           | 3.4   | 3.1    | 3.3   | 2.9          | 3.0   | 3.1    | 3.0   | 450      | 210   | 400    | 1.1k  |
| Seoul, SOUTH KOREA       | 0.9           | 2.3   | 3.1    | 1.2   | 3.2          | 3.1   | 3.0    | 3.2   | 87k      | 23k   | 15k    | 130k  |
| Guixi, CHINA             | 1.3           |       | 3.1    | 2.5   | 3.0          |       | 2.8    | 2.9   | 120      | 98    | 150    | 370   |
| Vienna, AUSTRIA          | 0.5           | 2.3   | 3.0    | 1.0   | 3.4          | 3.0   | 2.9    | 3.3   | 16k      | 5.9k  | 1.5k   | 23k   |
| Tebessa, ALGERIA         | 2.0           | 2.6   | 3.0    | 2.2   | 3.1          | 3.1   | 2.9    | 3.1   | 2.5k     | 850   | 370    | 3.8k  |
| Shenzhen, CHINA          | 2.5           | 2.6   | 3.0    | 2.7   | 3.1          | 3.1   | 3.0    | 3.1   | 6.8k     | 10k   | 5.6k   | 23k   |
| Reynosa, MEXICO          | 1.9           | 2.9   | 3.0    | 2.2   | 3.2          | 3.2   | 3.0    | 3.2   | 7.5k     | 720   | 3k     | 11k   |
| Oldenburg, GERMANY       | 2.0           | 3.0   | 3.0    | 2.2   | 3.2          | 3.0   | 2.9    | 3.1   | 2.5k     | 670   | 400    | 3.5k  |
| Guangzhou, CHINA         | 1.8           | 2.8   | 2.9    | 2.8   | 3.2          | 3.0   | 3.0    | 3.0   | 5.6k     | 34k   | 33k    | 73k   |
| Baghdad, IRAQ            | 2.1           | 3.3   | 2.9    | 2.2   | 3.1          | 2.8   | 2.9    | 3.1   | 45k      | 800   | 1.1k   | 47k   |
| Gomel, BELARUS           | 1.6           | 2.4   | 2.9    | 2.0   | 3.3          | 3.0   | 2.9    | 3.1   | 1.4k     | 1.1k  | 190    | 2.7k  |
| Riyadh, SAUDI ARABIA     | 1.7           | 2.7   | 2.9    | 2.1   | 3.2          | 3.1   | 3.1    | 3.1   | 50k      | 14k   | 26k    | 90k   |
| Qingdao, CHINA           | 1.6           | 1.0   | 2.8    | 2.4   | 3.2          | 3.2   | 3.0    | 3.0   | 2.7k     | 2.3k  | 14k    | 19k   |
| Singapore, SINGAPORE     | 1.9           | 1.5   | 2.8    | 1.9   | 3.3          | 3.4   | 3.2    | 3.3   | 14k      | 2.3k  | 620    | 17k   |
| Cochabamba, BOLIVIA      | 0.6           | 2.2   | 2.8    | 1.6   | 3.4          | 3.1   | 3.0    | 3.2   | 9.5k     | 6.2k  | 5.8k   | 21k   |
| Cairo, EGYPT             | 1.4           | 2.2   | 2.7    | 2.1   | 3.2          | 3.1   | 3.1    | 3.1   | 23k      | 5.1k  | 33k    | 62k   |
| Cordoba, ARGENTINA       | 0.6           | 2.3   | 2.7    | 1.0   | 3.4          | 3.2   | 3.1    | 3.3   | 22k      | 2.4k  | 4.5k   | 29k   |
| Xingping, CHINA          | 2.4           |       | 2.7    | 2.5   | 3.0          |       | 2.9    | 2.9   | 110      | 34    | 260    | 410   |
| Beijing, CHINA           | 2.0           | 2.7   | 2.7    | 2.3   | 3.2          | 3.1   | 3.1    | 3.1   | 19k      | 4.6k  | 15k    | 39k   |
| Bukhara, UZBEKISTAN      | 0.9           | 2.9   | 2.7    | 2.5   | 3.3          | 2.9   | 2.9    | 2.9   | 380      | 910   | 1.3k   | 2.6k  |
| Belgaum, INDIA           | 1.2           | 2.1   | 2.7    | 2.2   | 3.1          | 3.1   | 3.0    | 3.1   | 560      | 740   | 1.5k   | 2.8k  |
| Taipei, CHINA            | 0.4           | 1.9   | 2.6    | 1.2   | 3.4          | 3.1   | 3.0    | 3.2   | 15k      | 9.3k  | 7.7k   | 33k   |
| Yulin, CHINA             | 2.7           | 2.1   | 2.5    | 2.7   | 2.9          | 3.1   | 2.9    | 3.0   | 210      | 320   | 300    | 820   |
| Bicheng, CHINA           | 0.2           | 0.4   | 2.5    | 1.7   | 3.3          | 3.3   | 3.1    | 3.1   | 150      | 130   | 630    | 910   |
| Zwolle, NETHERLANDS      | 2.0           | 1.6   | 2.5    | 1.9   | 3.1          | 3.3   | 3.0    | 3.1   | 3.1k     | 470   | 200    | 3.7k  |
| Tianjin, CHINA           | 1.7           | 2.9   | 2.5    | 2.3   | 3.3          | 3.1   | 3.1    | 3.1   | 5k       | 1.2k  | 14k    | 20k   |

|                         | Sprawl (SNDi) |       |        |       | Nodal degree |       |        |       | N(nodes) |       |        |       |
|-------------------------|---------------|-------|--------|-------|--------------|-------|--------|-------|----------|-------|--------|-------|
|                         | <1990         | 90-99 | '00-13 | Stock | <1990        | 90-99 | '00-13 | Stock | <1990    | 90-99 | '00-13 | Stock |
| Yucheng, CHINA          | 3.0           | 2.8   | 2.5    | 2.8   | 2.9          | 2.8   | 2.9    | 2.9   | 310      | 290   | 250    | 850   |
| Hangzhou, CHINA         | 1.1           | 1.9   | 2.5    | 2.0   | 3.4          | 3.3   | 3.1    | 3.2   | 2.7k     | 7.9k  | 11k    | 22k   |
| Kayseri, TURKEY         | 1.2           | 1.4   | 2.5    | 1.7   | 3.2          | 3.2   | 3.0    | 3.1   | 1.7k     | 6.6k  | 4.1k   | 12k   |
| Chengdu, CHINA          | 2.0           | 2.9   | 2.4    | 2.5   | 3.1          | 3.1   | 3.1    | 3.1   | 4.5k     | 6.7k  | 10k    | 21k   |
| Yamaguchi, JAPAN        | 2.5           | 2.5   | 2.4    | 2.5   | 2.9          | 3.1   | 3.0    | 2.9   | 11k      | 850   | 240    | 12k   |
| Ndola, ZAMBIA           | 2.1           | 2.2   | 2.4    | 2.1   | 3.0          | 3.0   | 2.9    | 3.0   | 2.7k     | 980   | 450    | 4.2k  |
| Wuhan, CHINA            | 2.0           | 2.4   | 2.3    | 2.3   | 3.1          | 3.1   | 3.0    | 3.1   | 5.5k     | 2k    | 7.9k   | 15k   |
| Leshan, CHINA           | 0.6           | 1.5   | 2.3    | 1.4   | 3.2          | 3.1   | 3.0    | 3.1   | 200      | 190   | 200    | 590   |
| Yiyang, CHINA           | 1.1           | 1.9   | 2.3    | 1.8   | 3.3          | 3.2   | 3.0    | 3.1   | 270      | 200   | 260    | 730   |
| Karachi, PAKISTAN       | 1.8           | 1.4   | 2.3    | 1.8   | 3.2          | 3.2   | 3.2    | 3.2   | 20k      | 9k    | 7.5k   | 36k   |
| Changzhou, CHINA        | 1.6           | 1.9   | 2.3    | 2.0   | 3.2          | 3.2   | 3.2    | 3.2   | 810      | 2k    | 2.9k   | 5.7k  |
| Le Mans, FRANCE         | 1.6           | 2.7   | 2.3    | 1.7   | 3.2          | 3.2   | 3.0    | 3.2   | 4.2k     | 130   | 490    | 4.8k  |
| Okayama, JAPAN          | 1.6           | 2.4   | 2.3    | 1.6   | 3.1          | 3.1   | 3.1    | 3.1   | 51k      | 1.6k  | 3.4k   | 56k   |
| Zhengzhou, CHINA        | 2.4           | 2.3   | 2.2    | 2.4   | 3.2          | 3.2   | 3.2    | 3.2   | 2.9k     | 1.1k  | 5.4k   | 9.4k  |
| Budapest, HUNGARY       | 0.5           | 1.3   | 2.2    | 1.2   | 3.4          | 3.1   | 3.0    | 3.2   | 20k      | 640   | 14k    | 34k   |
| Changzhi, CHINA         | 0.8           | 3.3   | 2.2    | 1.8   | 3.4          | 3.1   | 3.0    | 3.2   | 370      | 180   | 310    | 860   |
| Zhuji, CHINA            | 1.3           | 2.1   | 2.1    | 1.8   | 3.1          | 3.1   | 3.0    | 3.1   | 900      | 800   | 340    | 2k    |
| Addis Ababa, ETHIOPIA   | 2.6           | 2.2   | 2.1    | 2.3   | 2.9          | 3.1   | 3.1    | 3.0   | 16k      | 11k   | 16k    | 43k   |
| Ribeirao Preto, BRAZIL  | 1.1           | 3.0   | 2.1    | 1.4   | 3.3          | 3.0   | 3.1    | 3.3   | 9.3k     | 1.6k  | 1.5k   | 12k   |
| Berlin, GERMANY         | 0.3           | 1.0   | 2.1    | 0.9   | 3.5          | 3.3   | 3.1    | 3.3   | 18k      | 11k   | 11k    | 40k   |
| Thessaloniki, GREECE    | 0.1           | 1.9   | 2.1    | 0.5   | 3.4          | 3.2   | 3.1    | 3.3   | 11k      | 1.2k  | 2.5k   | 14k   |
| Fukuoka, JAPAN          | 1.1           | 1.8   | 2.0    | 1.2   | 3.2          | 3.1   | 3.1    | 3.2   | 47k      | 6.7k  | 2.7k   | 56k   |
| Gombe, NIGERIA          | 1.6           | 3.7   | 2.0    | 2.0   | 3.2          | 2.9   | 3.1    | 3.1   | 1.8k     | 560   | 4.5k   | 6.9k  |
| Valledupar, COLOMBIA    | -0.2          | 0.6   | 2.0    | 0.2   | 3.5          | 3.4   | 3.2    | 3.5   | 3k       | 1.1k  | 650    | 4.8k  |
| Gwangju, SOUTH KOREA    | 0.4           | 1.3   | 1.9    | 0.9   | 3.4          | 3.2   | 3.2    | 3.3   | 5.3k     | 2.7k  | 2.3k   | 10k   |
| Anqing, CHINA           | 0.5           |       | 1.9    | 1.0   | 3.3          |       | 3.1    | 3.2   | 200      | 96    | 260    | 560   |
| Busan, SOUTH KOREA      | 1.3           | 1.6   | 1.8    | 1.4   | 3.2          | 3.1   | 3.2    | 3.2   | 16k      | 4.1k  | 4.2k   | 24k   |
| Gaoyou, CHINA           |               |       | 1.8    | 1.8   |              |       | 3.1    | 3.1   | 83       | 32    | 150    | 260   |
| Kanpur, INDIA           | 2.1           | 3.2   | 1.8    | 2.1   | 3.0          | 2.9   | 3.1    | 3.0   | 4.6k     | 440   | 420    | 5.5k  |
| Tokyo, JAPAN            | 1.1           | 1.6   | 1.8    | 1.1   | 3.2          | 3.1   | 3.1    | 3.1   | 660k     | 38k   | 97k    | 800k  |
| Marrakesh, MOROCCO      | 1.1           | 1.5   | 1.7    | 1.3   | 3.2          | 3.2   | 3.2    | 3.2   | 6.3k     | 2.2k  | 3.6k   | 12k   |
| Leon, NICARAGUA         | 1.0           | 3.2   | 1.7    | 1.5   | 3.3          | 2.9   | 3.1    | 3.2   | 1.1k     | 380   | 390    | 1.9k  |
| Madrid, SPAIN           | 0.7           | 1.5   | 1.7    | 1.1   | 3.4          | 3.3   | 3.2    | 3.3   | 28k      | 12k   | 15k    | 55k   |
| Buenos Aires, ARGENTINA | -0.1          | 0.9   | 1.6    | 0.3   | 3.6          | 3.5   | 3.3    | 3.5   | 120k     | 17k   | 26k    | 160k  |
| Suining, CHINA          |               |       | 1.6    | 1.0   |              |       | 3.2    | 3.3   | 51       | 61    | 120    | 230   |
| Bamako, MALI            | 0.6           | 1.0   | 1.6    | 1.1   | 3.3          | 3.2   | 3.1    | 3.2   | 13k      | 7.5k  | 16k    | 36k   |



|                      | Sprawl (SNDi) |       |        |       | Nodal degree |       |        |       | N(nodes) |       |        |       |
|----------------------|---------------|-------|--------|-------|--------------|-------|--------|-------|----------|-------|--------|-------|
|                      | <1990         | 90-99 | '00-13 | Stock | <1990        | 90-99 | '00-13 | Stock | <1990    | 90-99 | '00-13 | Stock |
| Jinju, SOUTH KOREA   | 0.8           | 2.4   | 1.6    | 1.2   | 3.3          | 3.2   | 3.1    | 3.2   | 2.5k     | 120   | 2.5k   | 5.1k  |
| Luanda, ANGOLA       | 2.0           | 2.2   | 1.5    | 1.8   | 3.0          | 3.0   | 3.1    | 3.1   | 12k      | 10k   | 28k    | 51k   |
| Cheonan, SOUTH KOREA | 0.2           | 0.7   | 1.3    | 0.8   | 3.4          | 3.4   | 3.2    | 3.3   | 1.6k     | 1.2k  | 2.6k   | 5.3k  |
| Vinh Long, VIET NAM  |               |       | 1.3    | 1.4   |              |       | 3.1    | 3.2   | 72       | 99    | 160    | 330   |
| Lubumbashi, DR CONGO | 1.7           | 1.8   | 1.3    | 1.5   | 3.1          | 3.0   | 3.1    | 3.1   | 6.7k     | 2.3k  | 7.7k   | 17k   |
| Jinan, CHINA         | 1.8           | 1.5   | 1.2    | 1.7   | 3.2          | 3.3   | 3.3    | 3.2   | 4.3k     | 620   | 990    | 5.9k  |
| Yanggu, CHINA        |               |       | 0.7    | 0.4   |              |       | 3.3    | 3.4   | 79       | 66    | 130    | 280   |
| Khartoum, SUDAN      | 0.2           | 0.6   | 0.7    | 0.5   | 3.4          | 3.3   | 3.3    | 3.3   | 56k      | 14k   | 38k    | 110k  |
| Xucheng, CHINA       |               |       | 0.5    | 0.8   |              |       | 3.6    | 3.5   | 12       | 51    | 260    | 330   |

## F.7 City maps

Maps for a number of cities are available as a  $\sim 300$  MB PDF at:

<http://sprawl.research.mcgill.ca/publications/2020-PNAS-sprawl/cities>

A higher resolution version of the map for Seoul (included in the main text) is available at <http://sprawl.research.mcgill.ca/publications/2020-PNAS-sprawl/SI/fig3-ts-citymap-Seoul.png>

## F.8 World maps

World maps for our sprawl metrics are available on an [interactive map site](#)

## F.9 World region trend plots

In the following pages, trends of individual countries (in each region or group) are represented by colored lines, and their distribution in each time range is summarized in a box plot. Each dotted line shows the latest stock value for all nodes in the group of countries. Country ISO codes are marked in microfont. Region classifications are from the World Bank [2016]. For more detail, see the tabular data.

The following pages show results only for SNDi. Other metrics are available online at:

<https://alum.mit.edu/www/cpbl/publications/2020-PNAS-sprawl>.

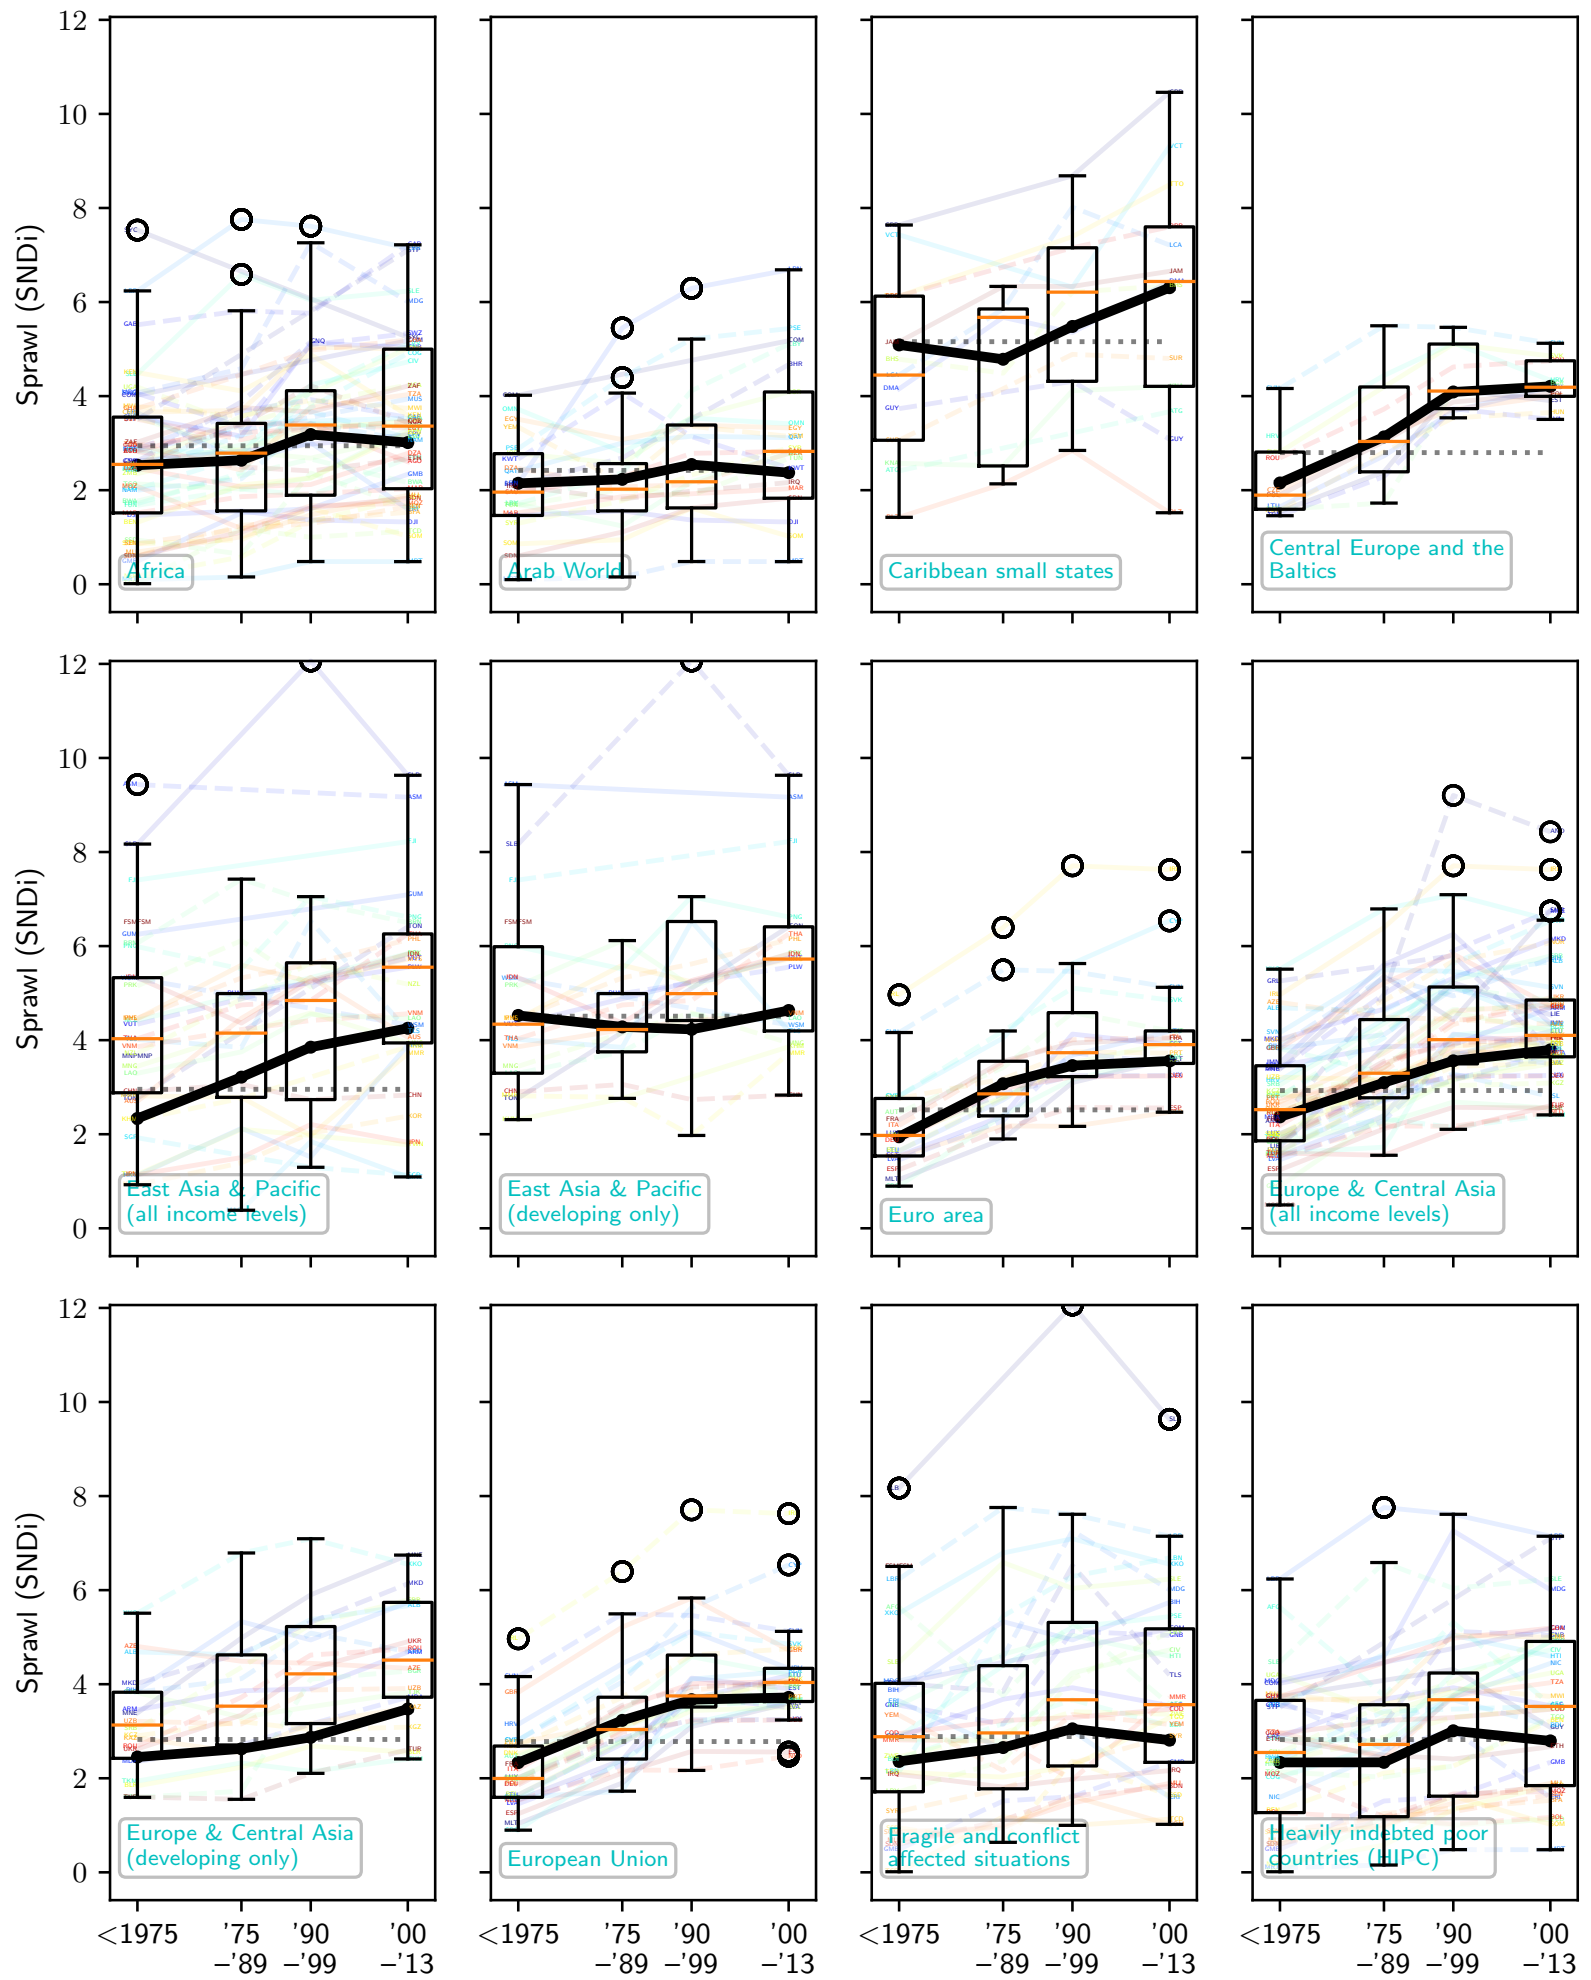

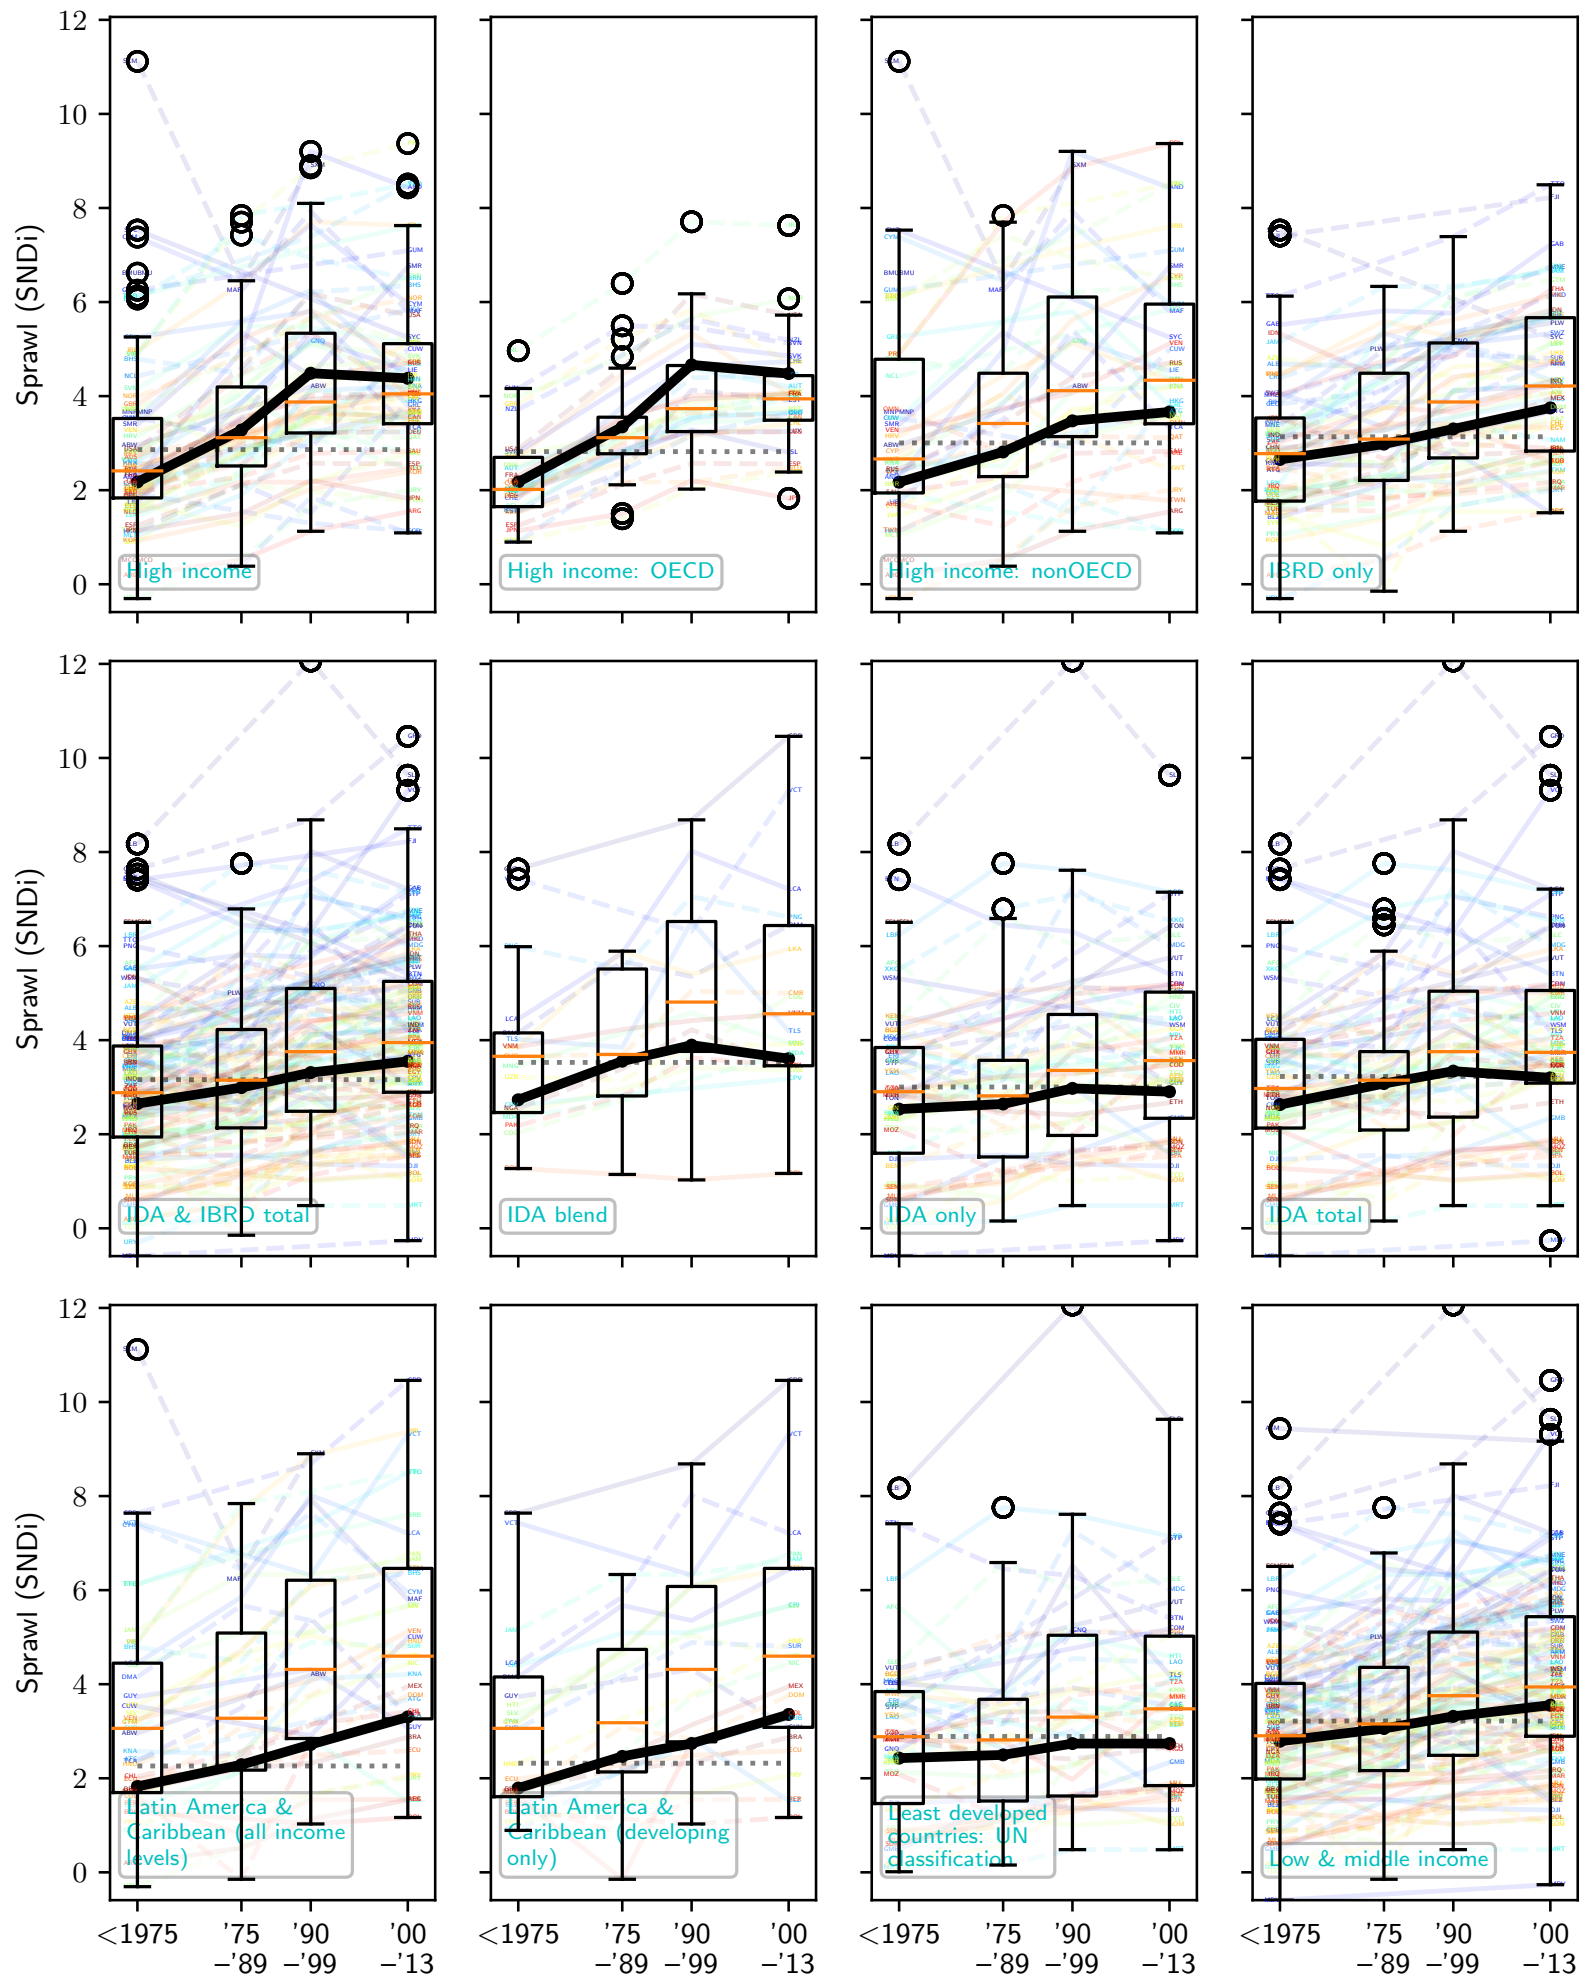

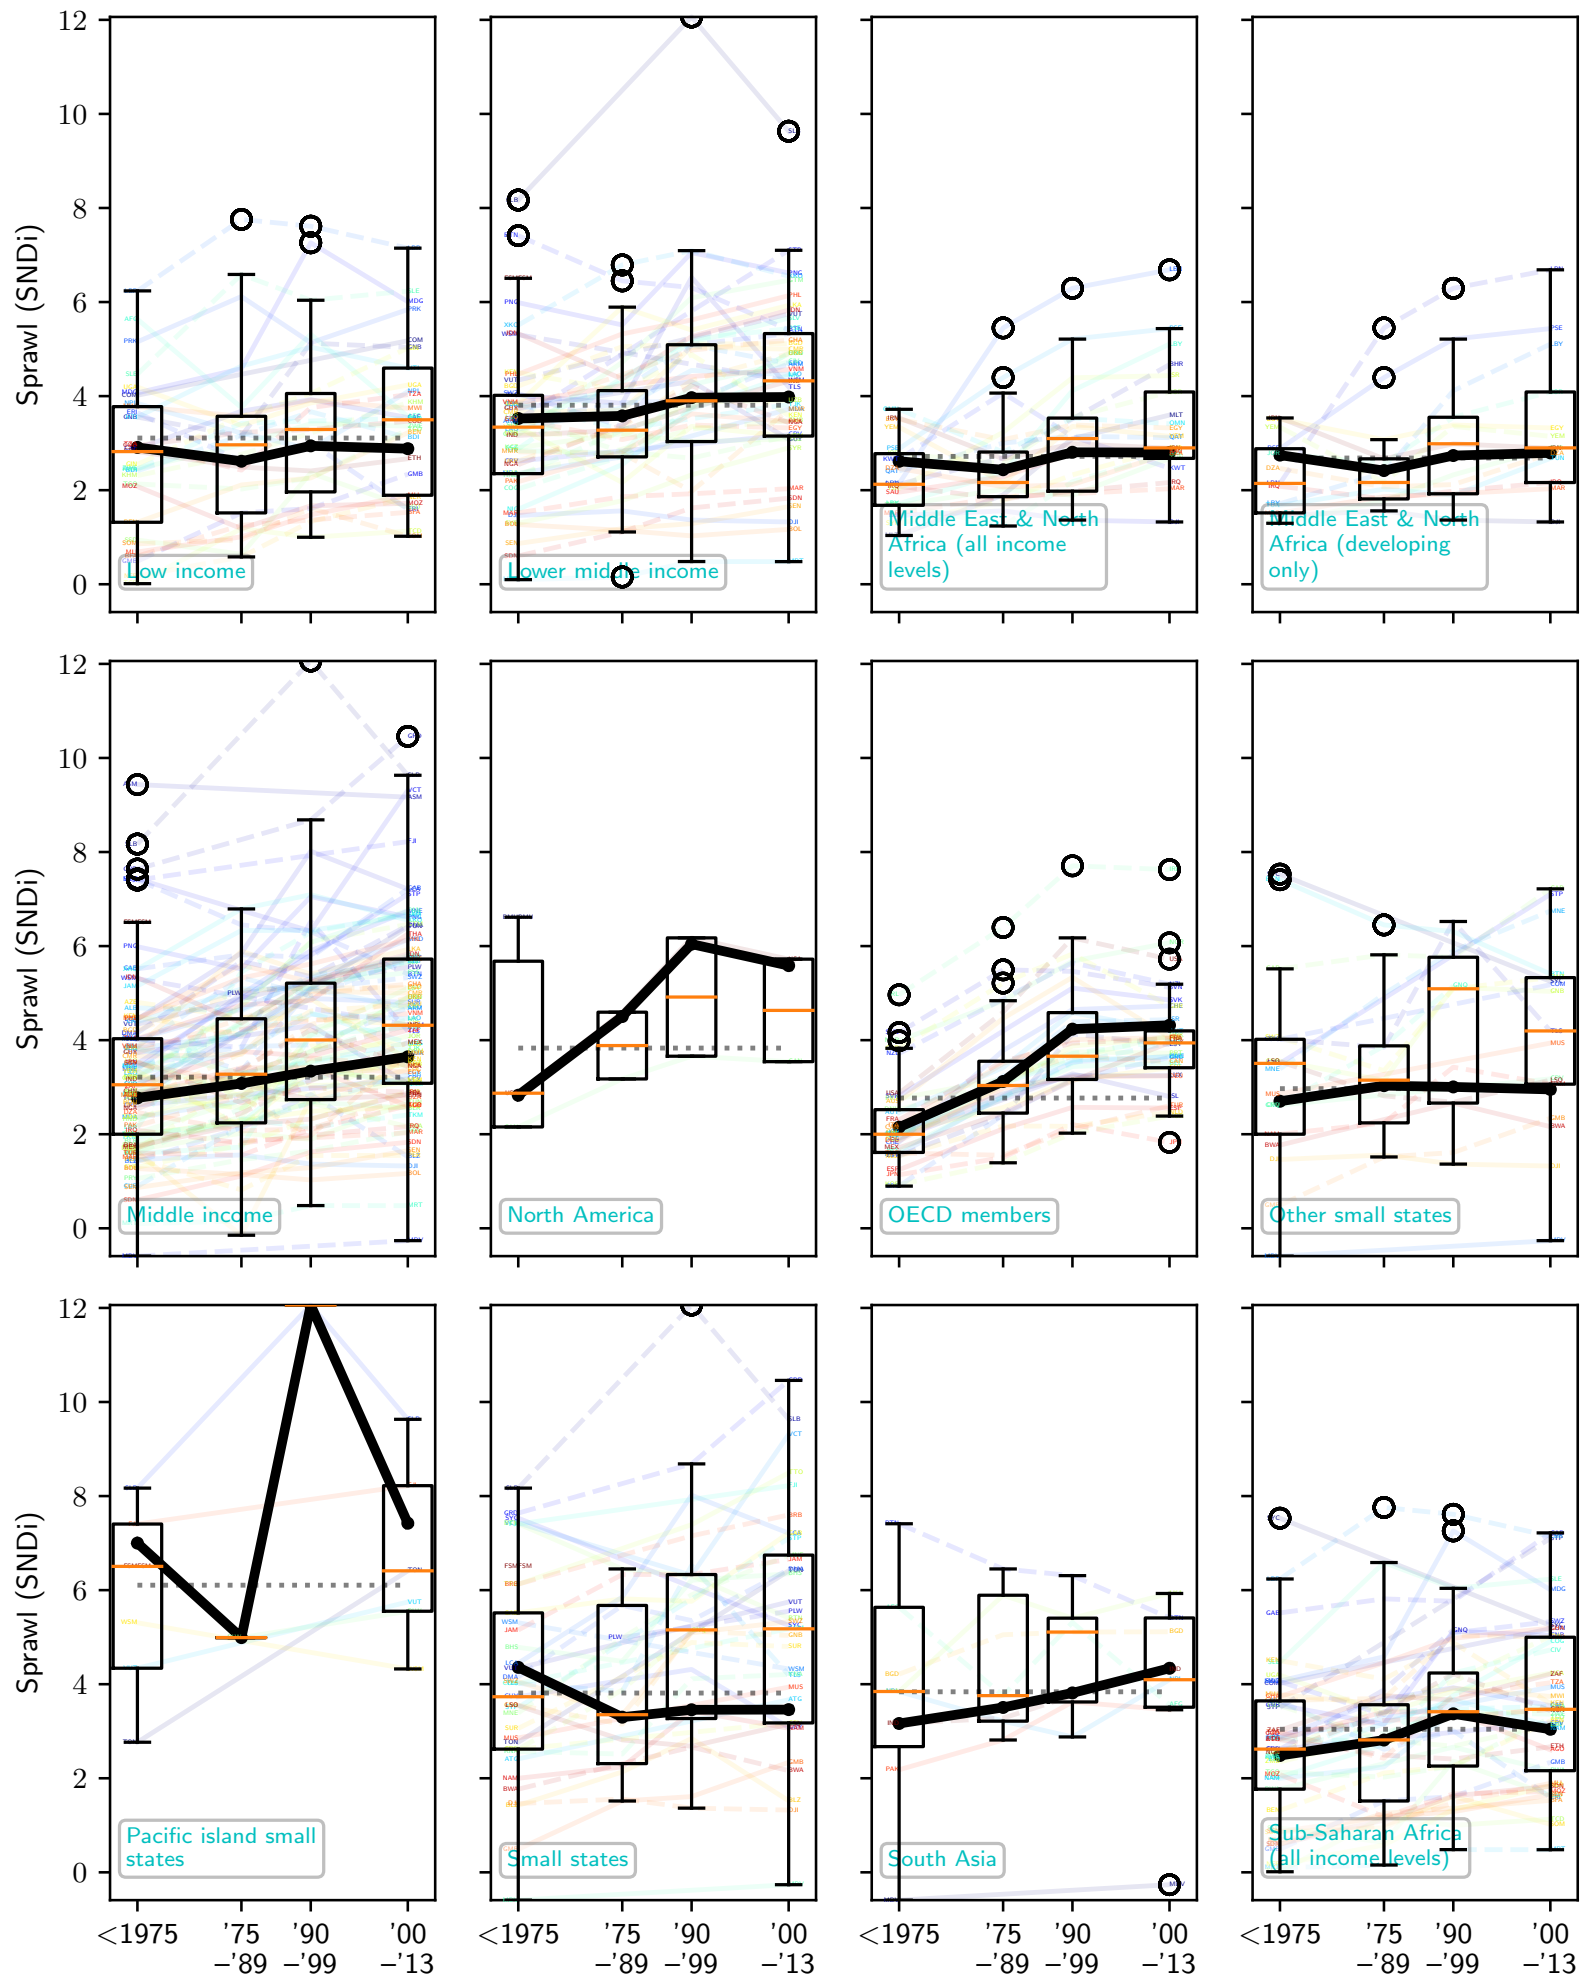

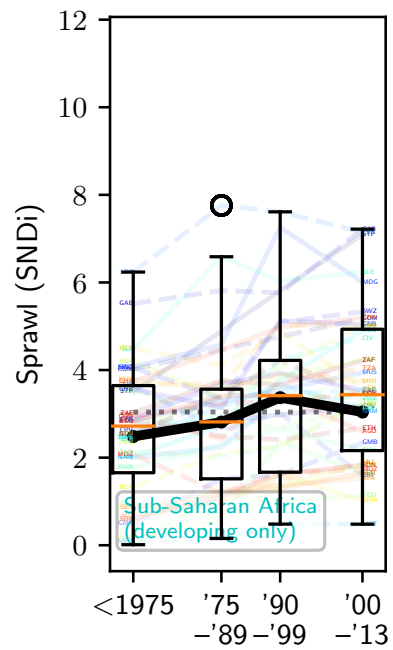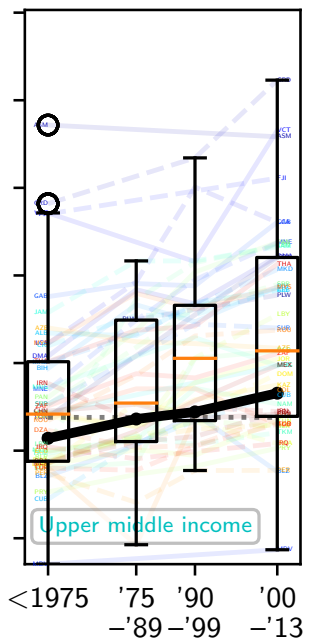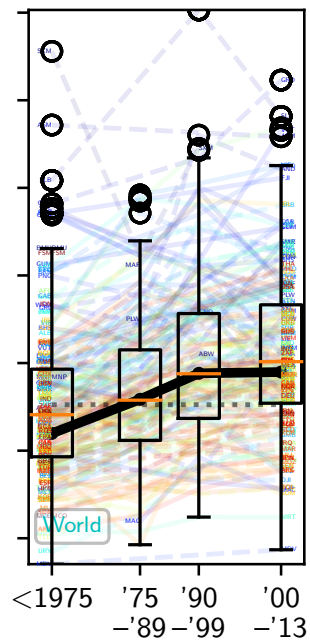

## F.10 Country trend plots with sub-national regional distributions

In the following pages, box plots are used to describe the distribution, within each time period in each country, of the metric over sub-national regions (i.e., GADM level 1). The blue shaded region shows the full extent of the minimum and maximum value across these sub-national regions. The dark line shows the mean over the entire country.

The following pages show results only for SNDi. Other metrics are available online at: <https://alum.mit.edu/www/cpbl/publications/2020-PNAS-sprawl>.

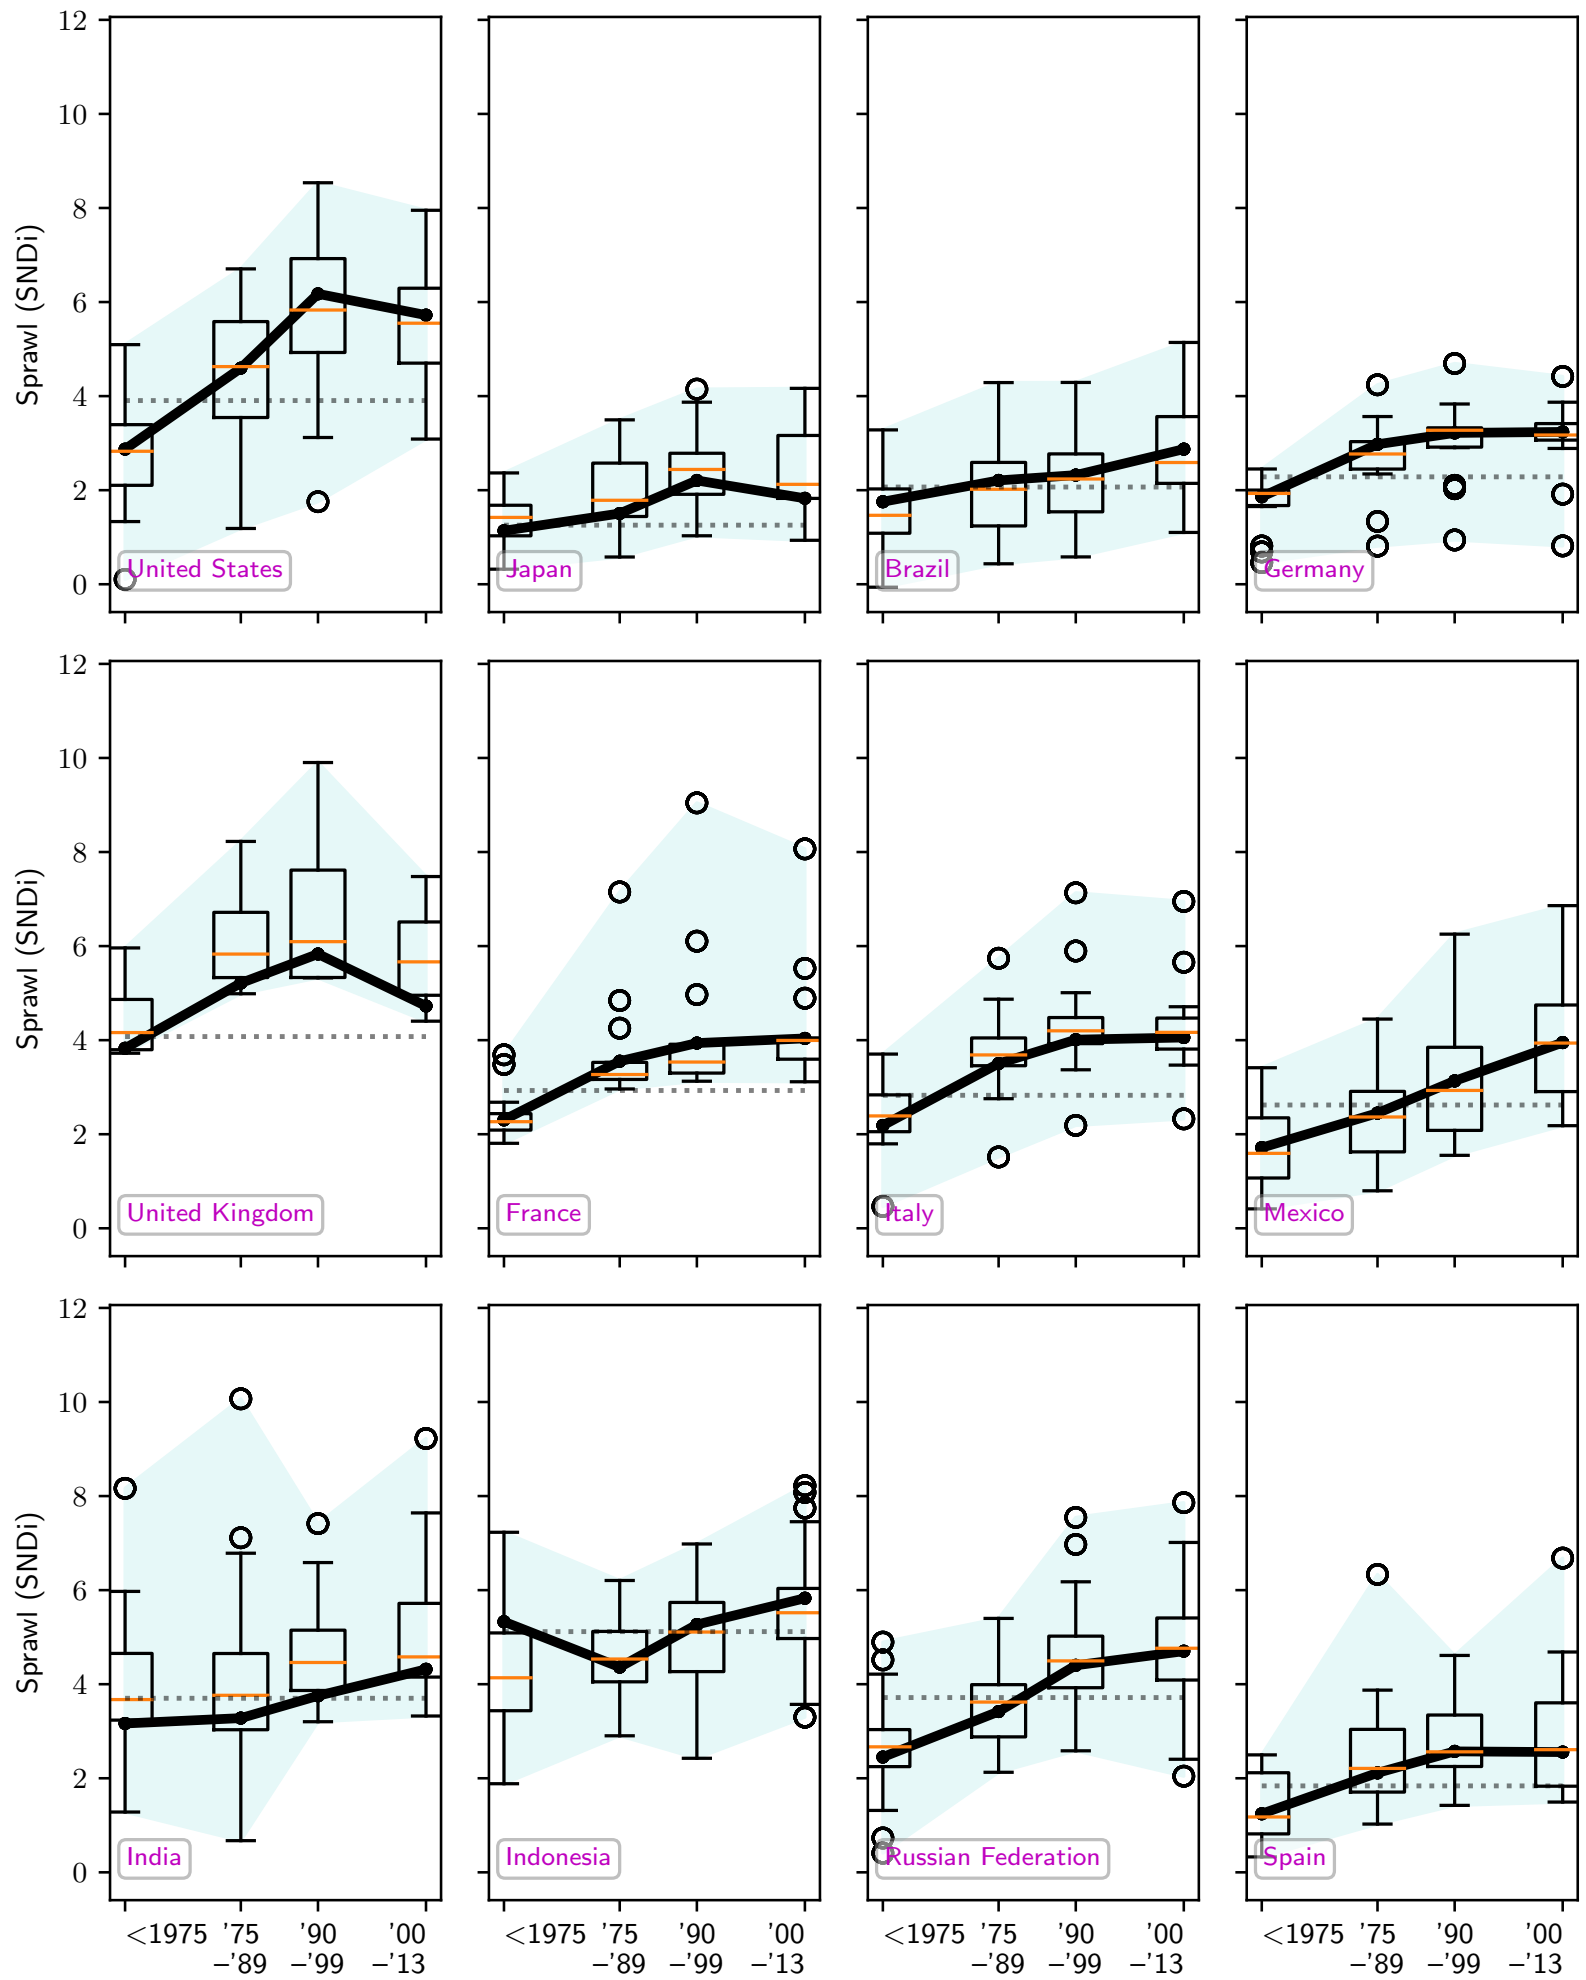



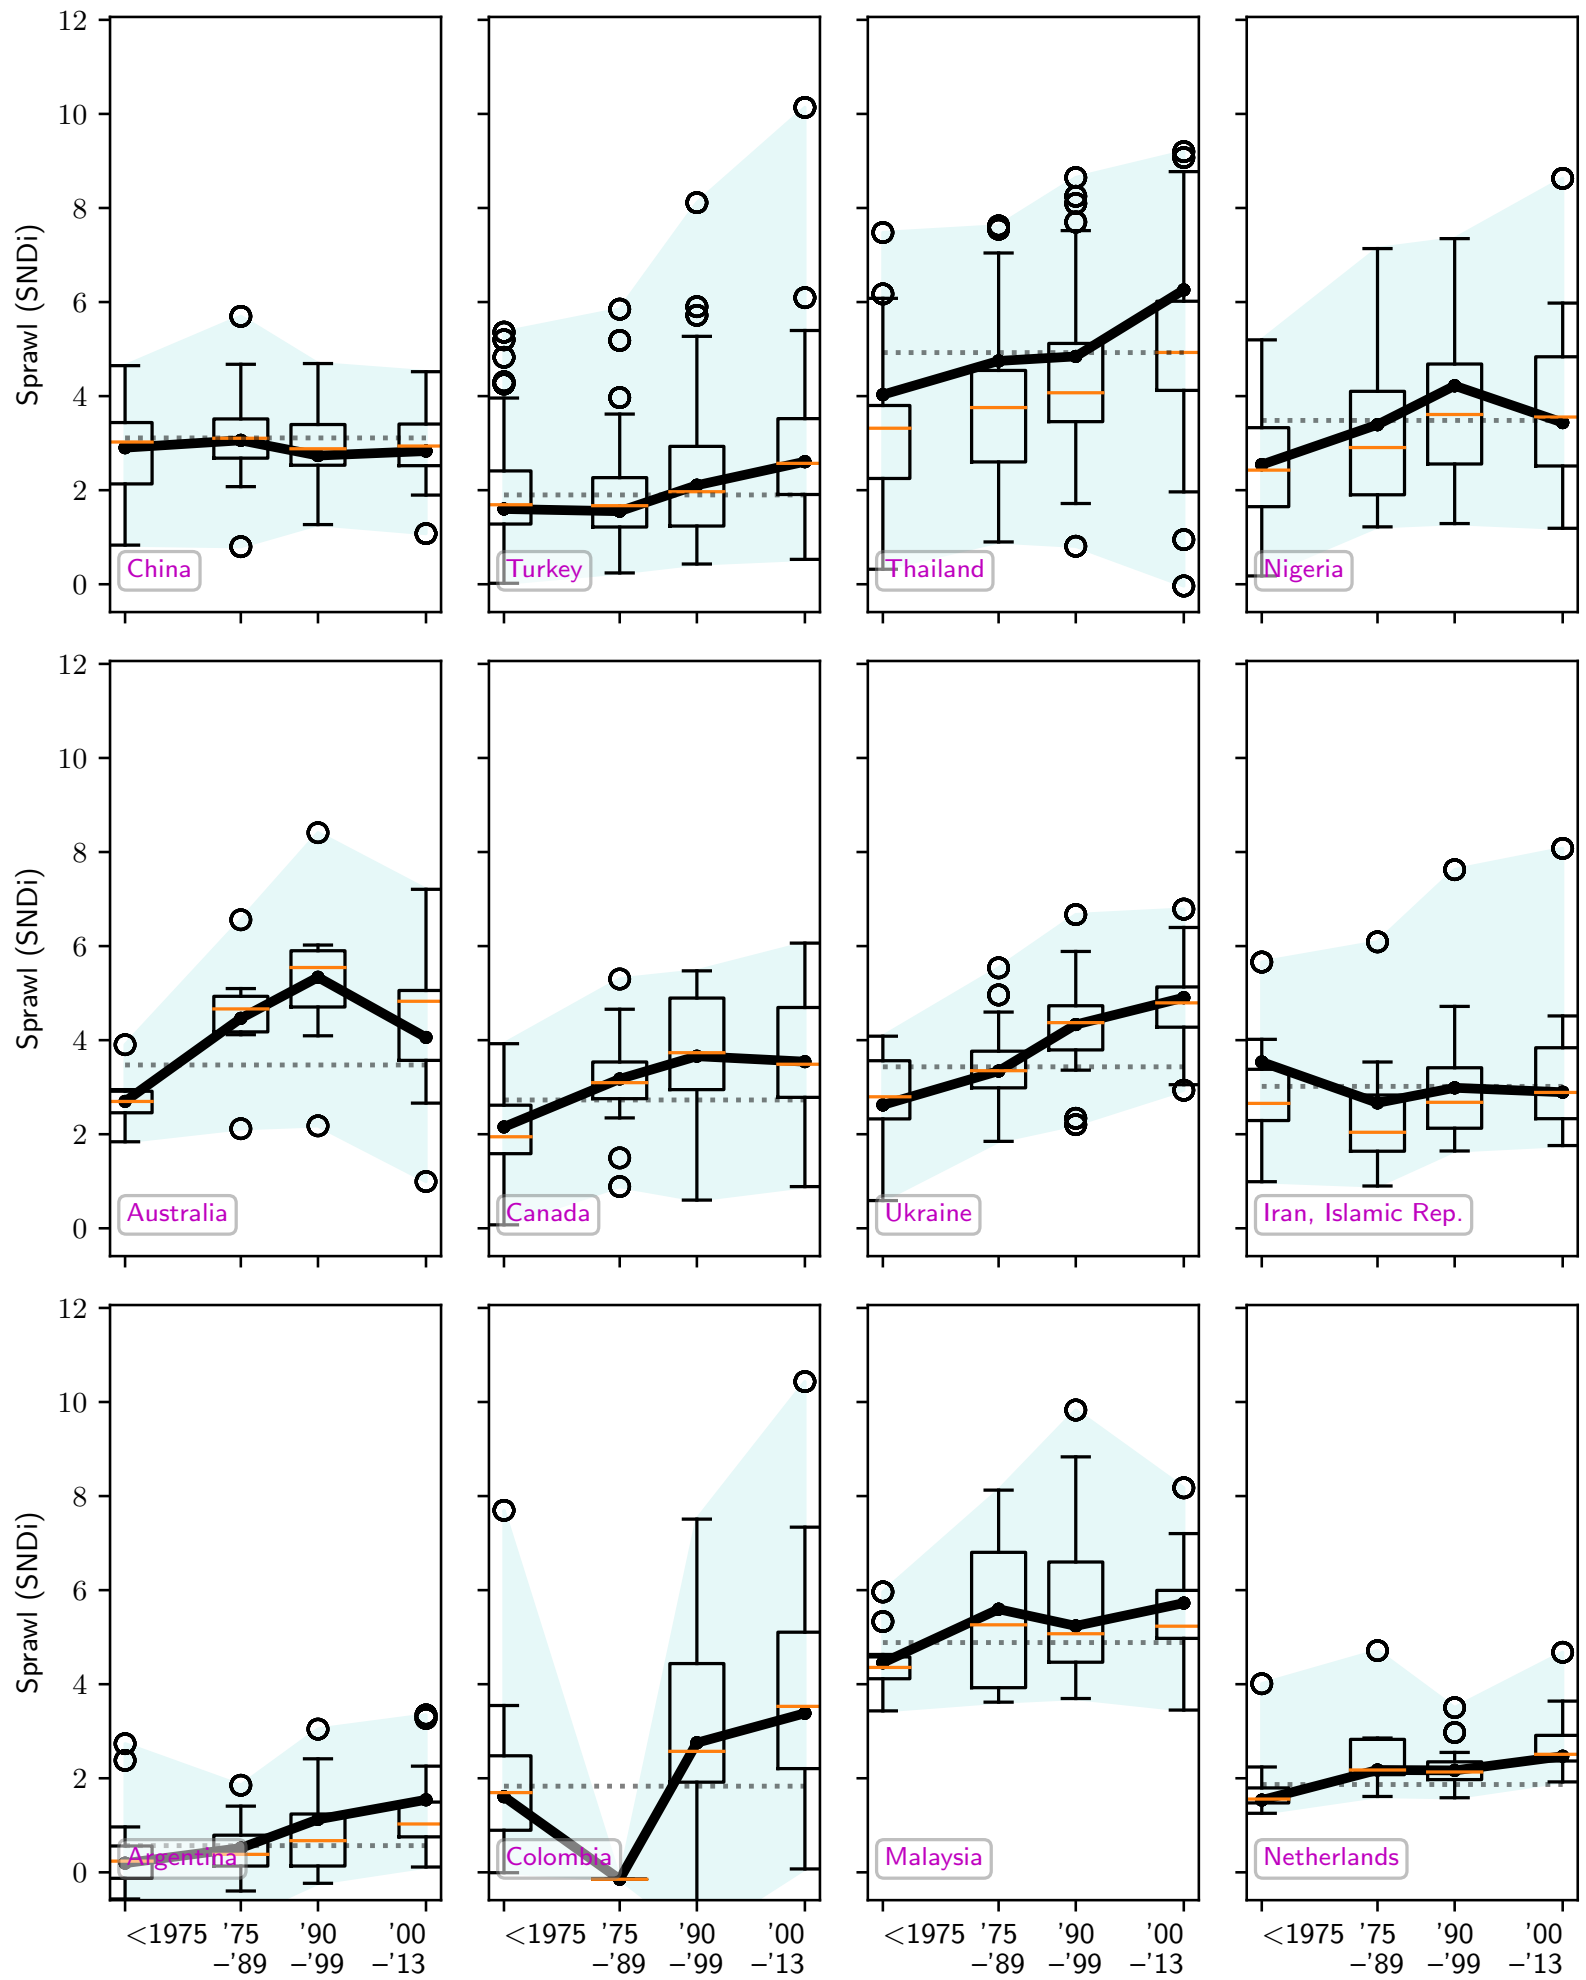

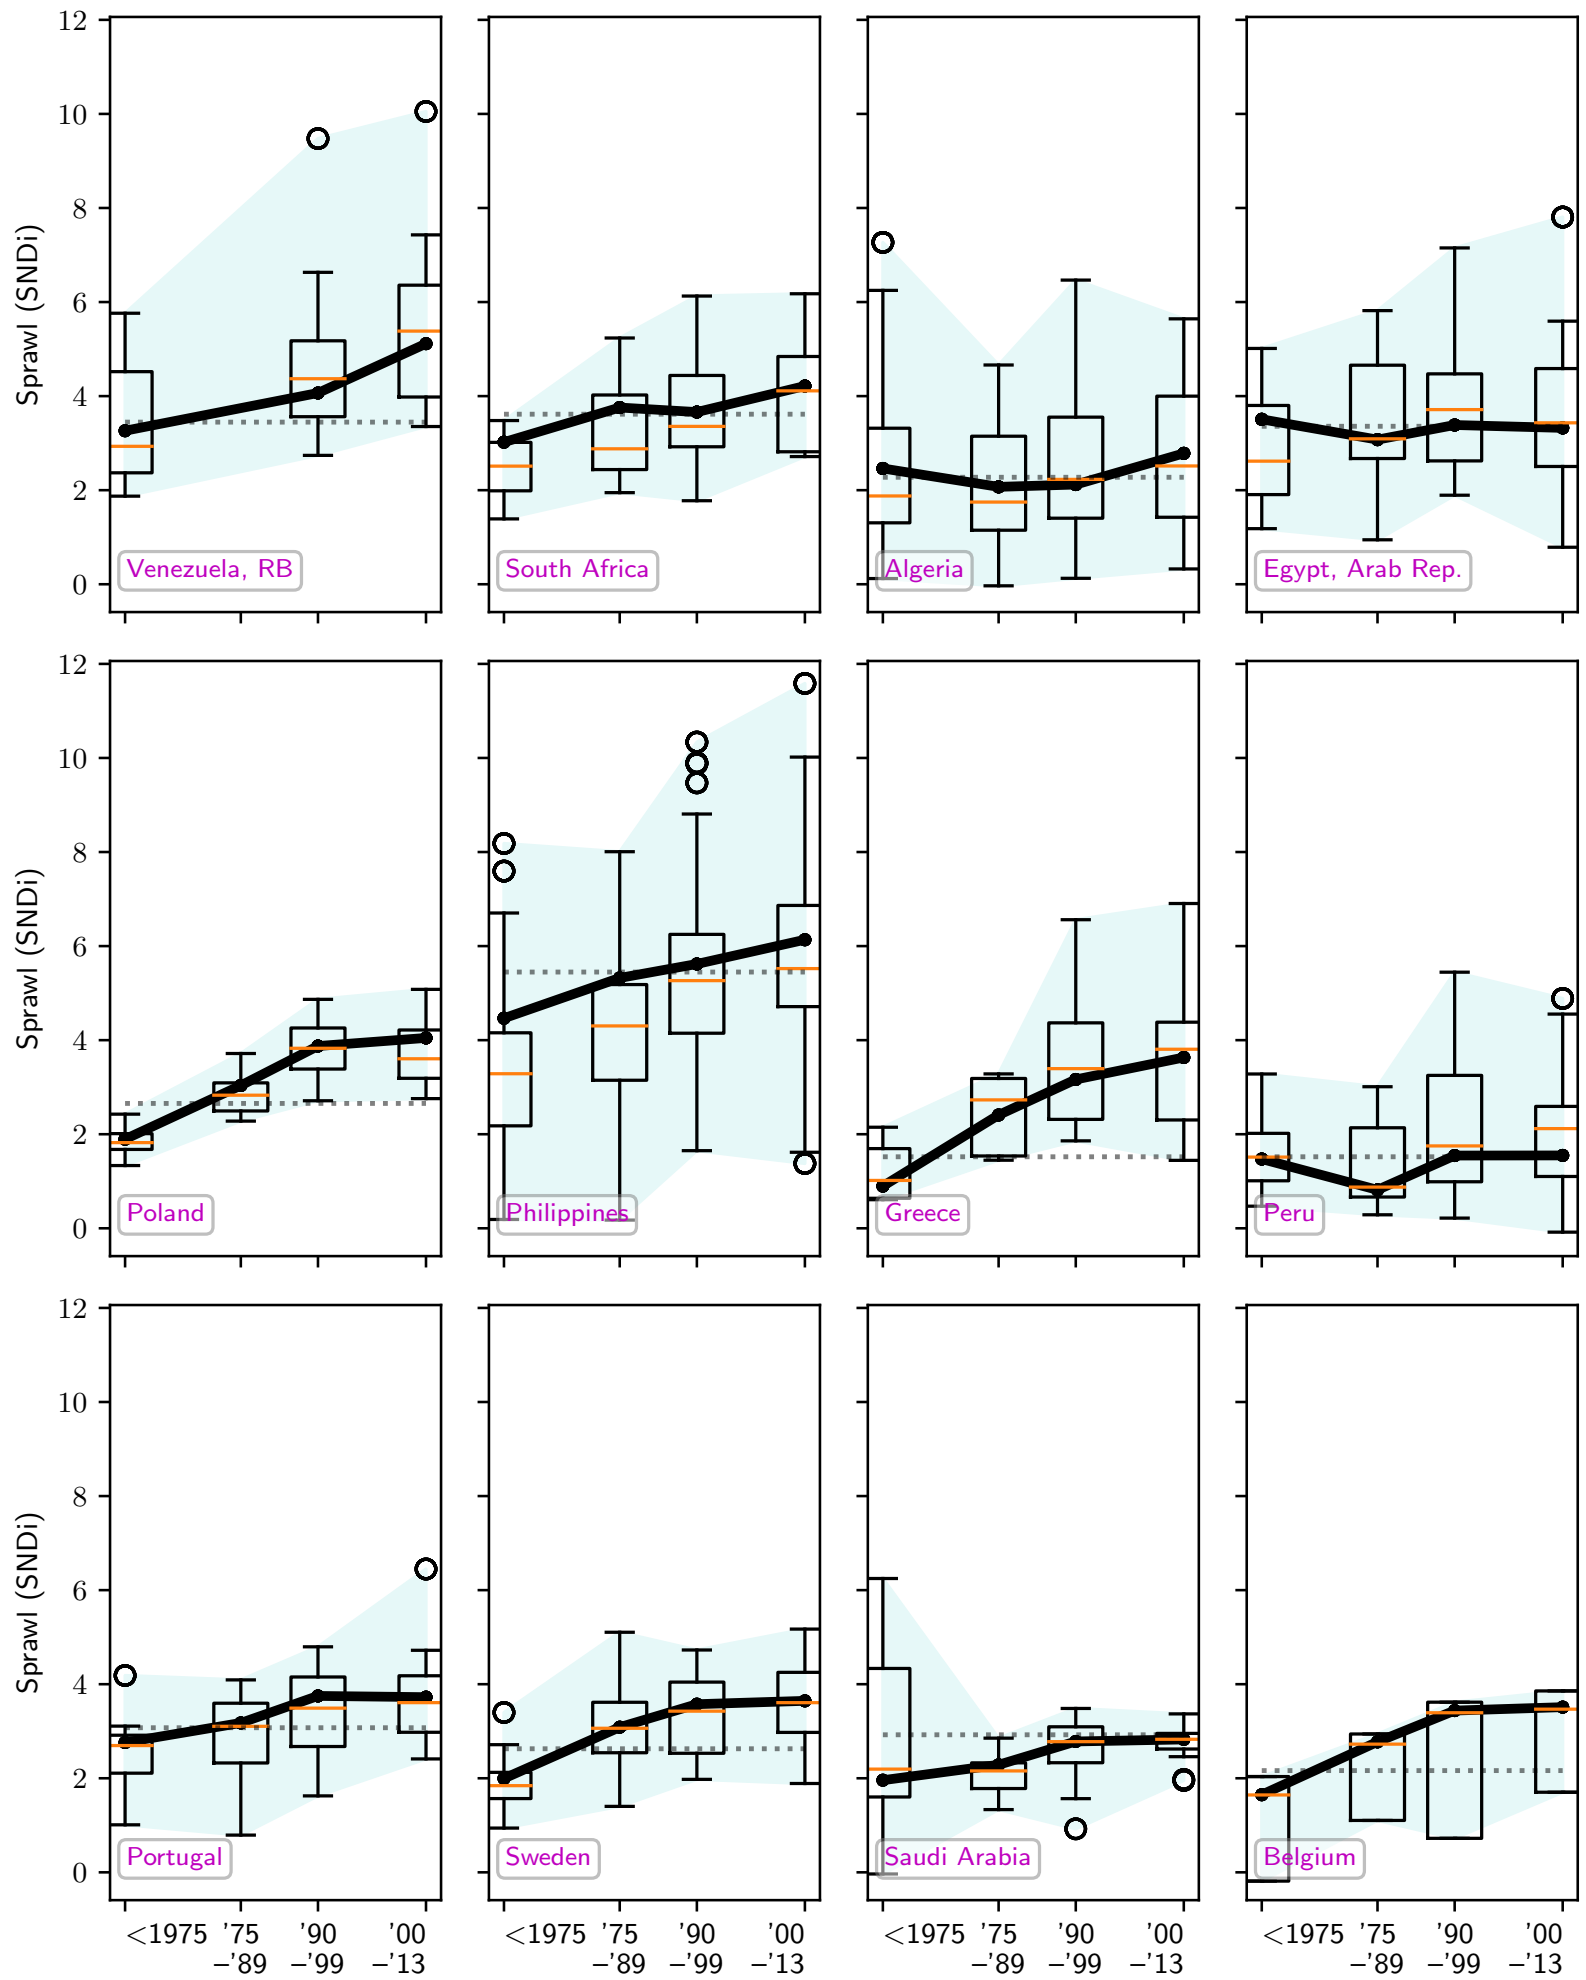

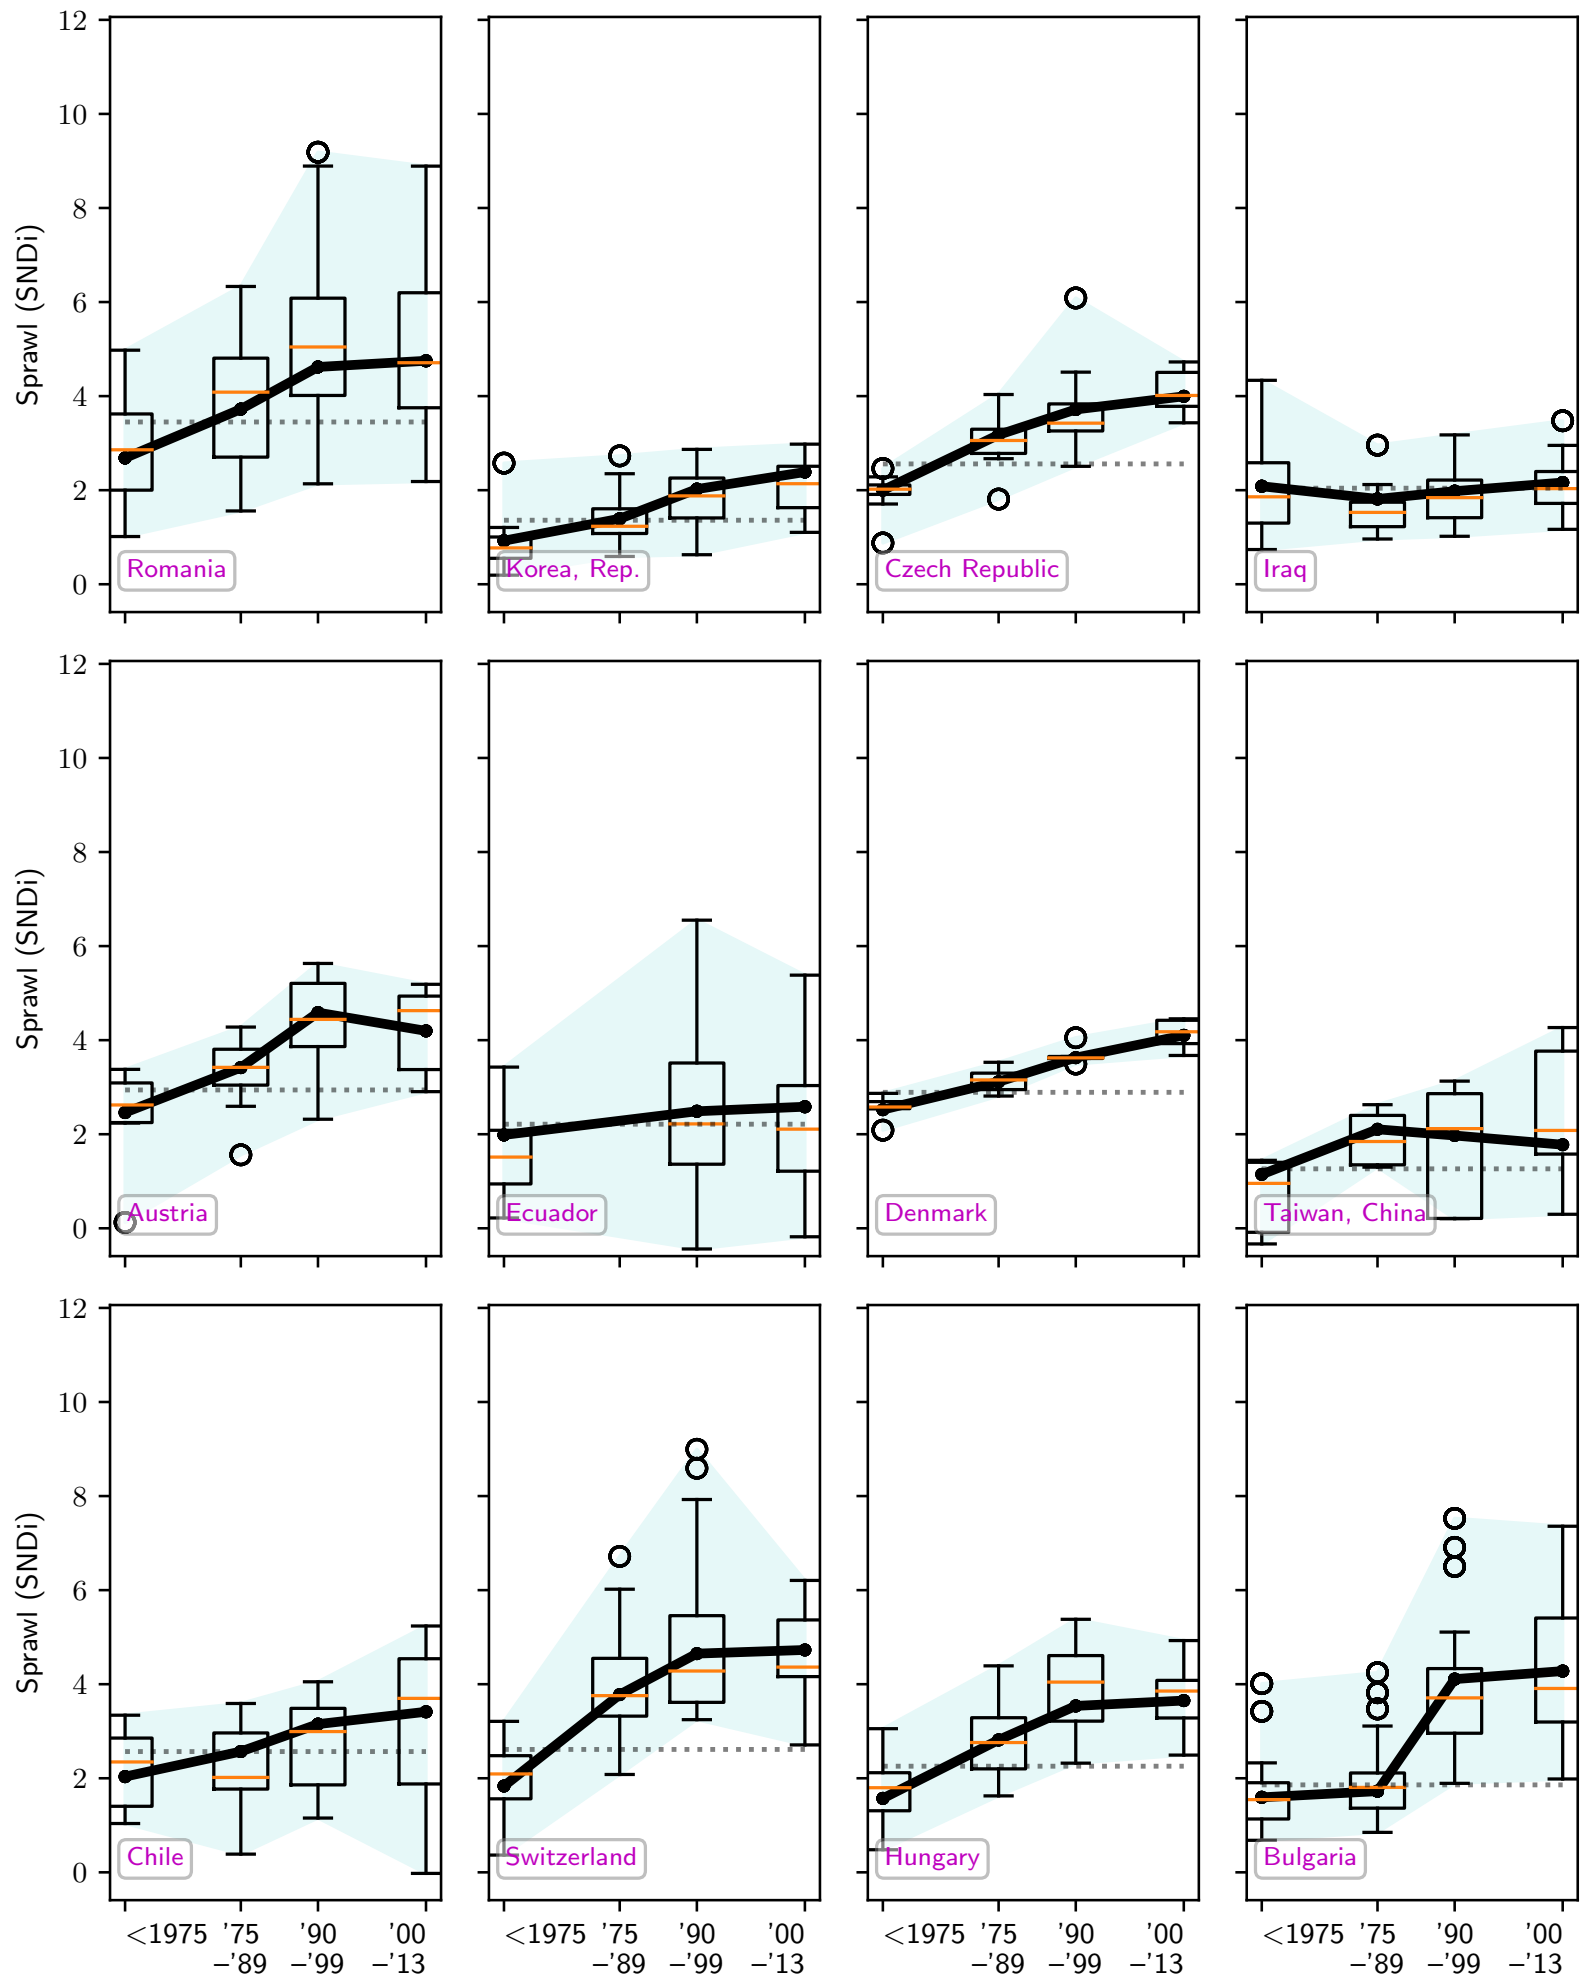

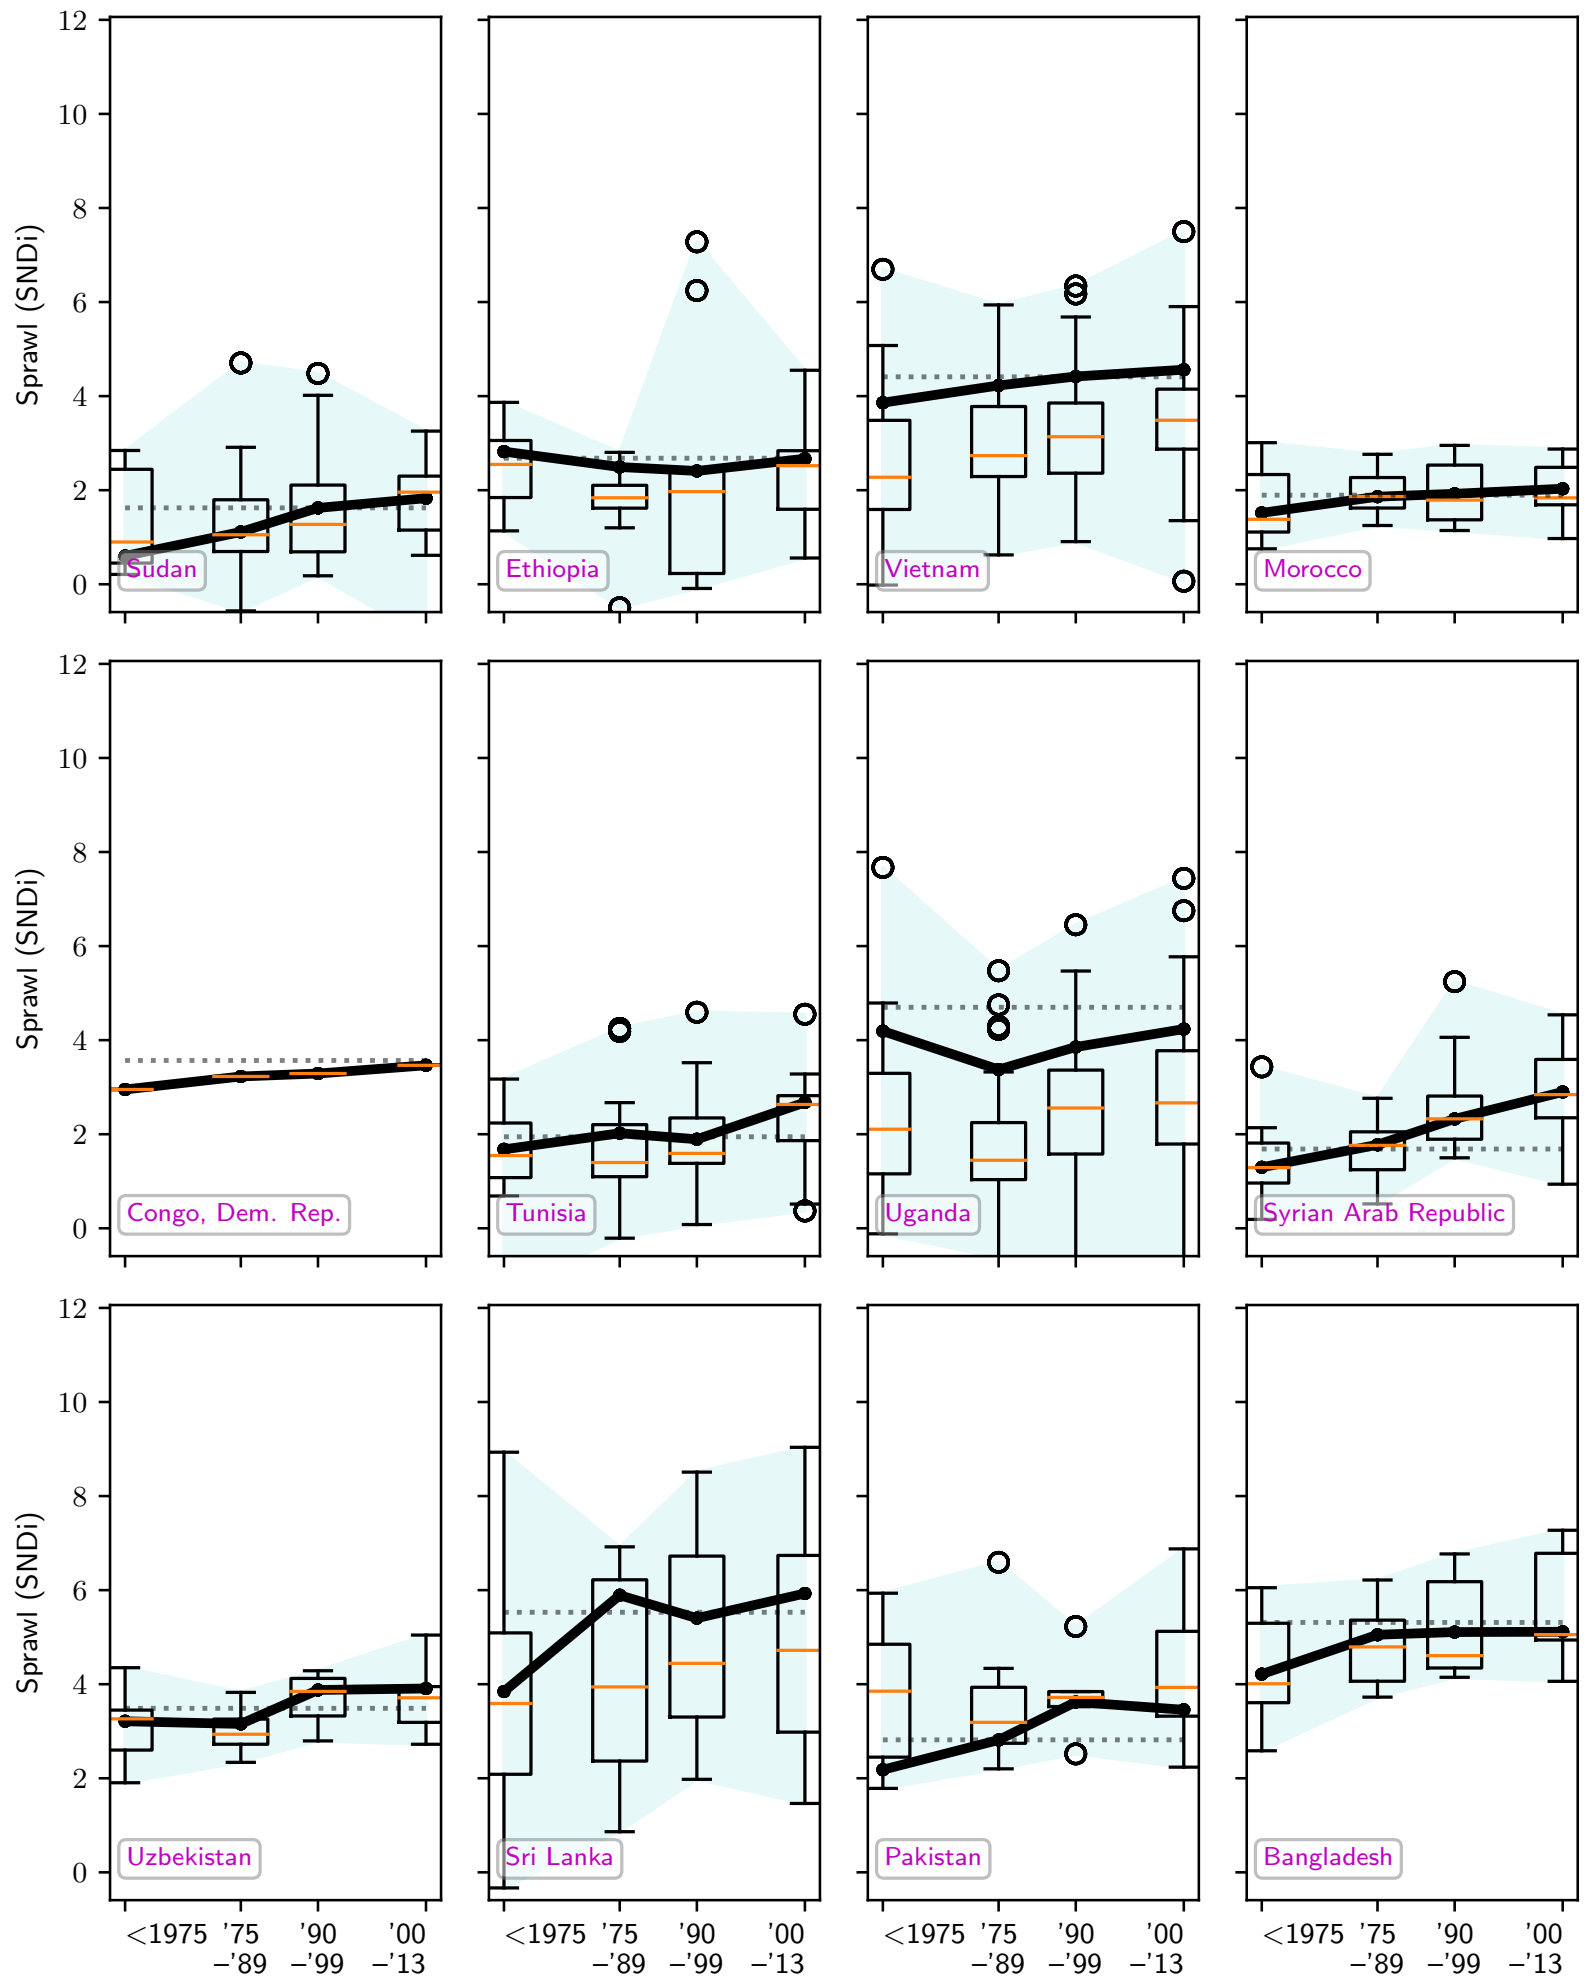

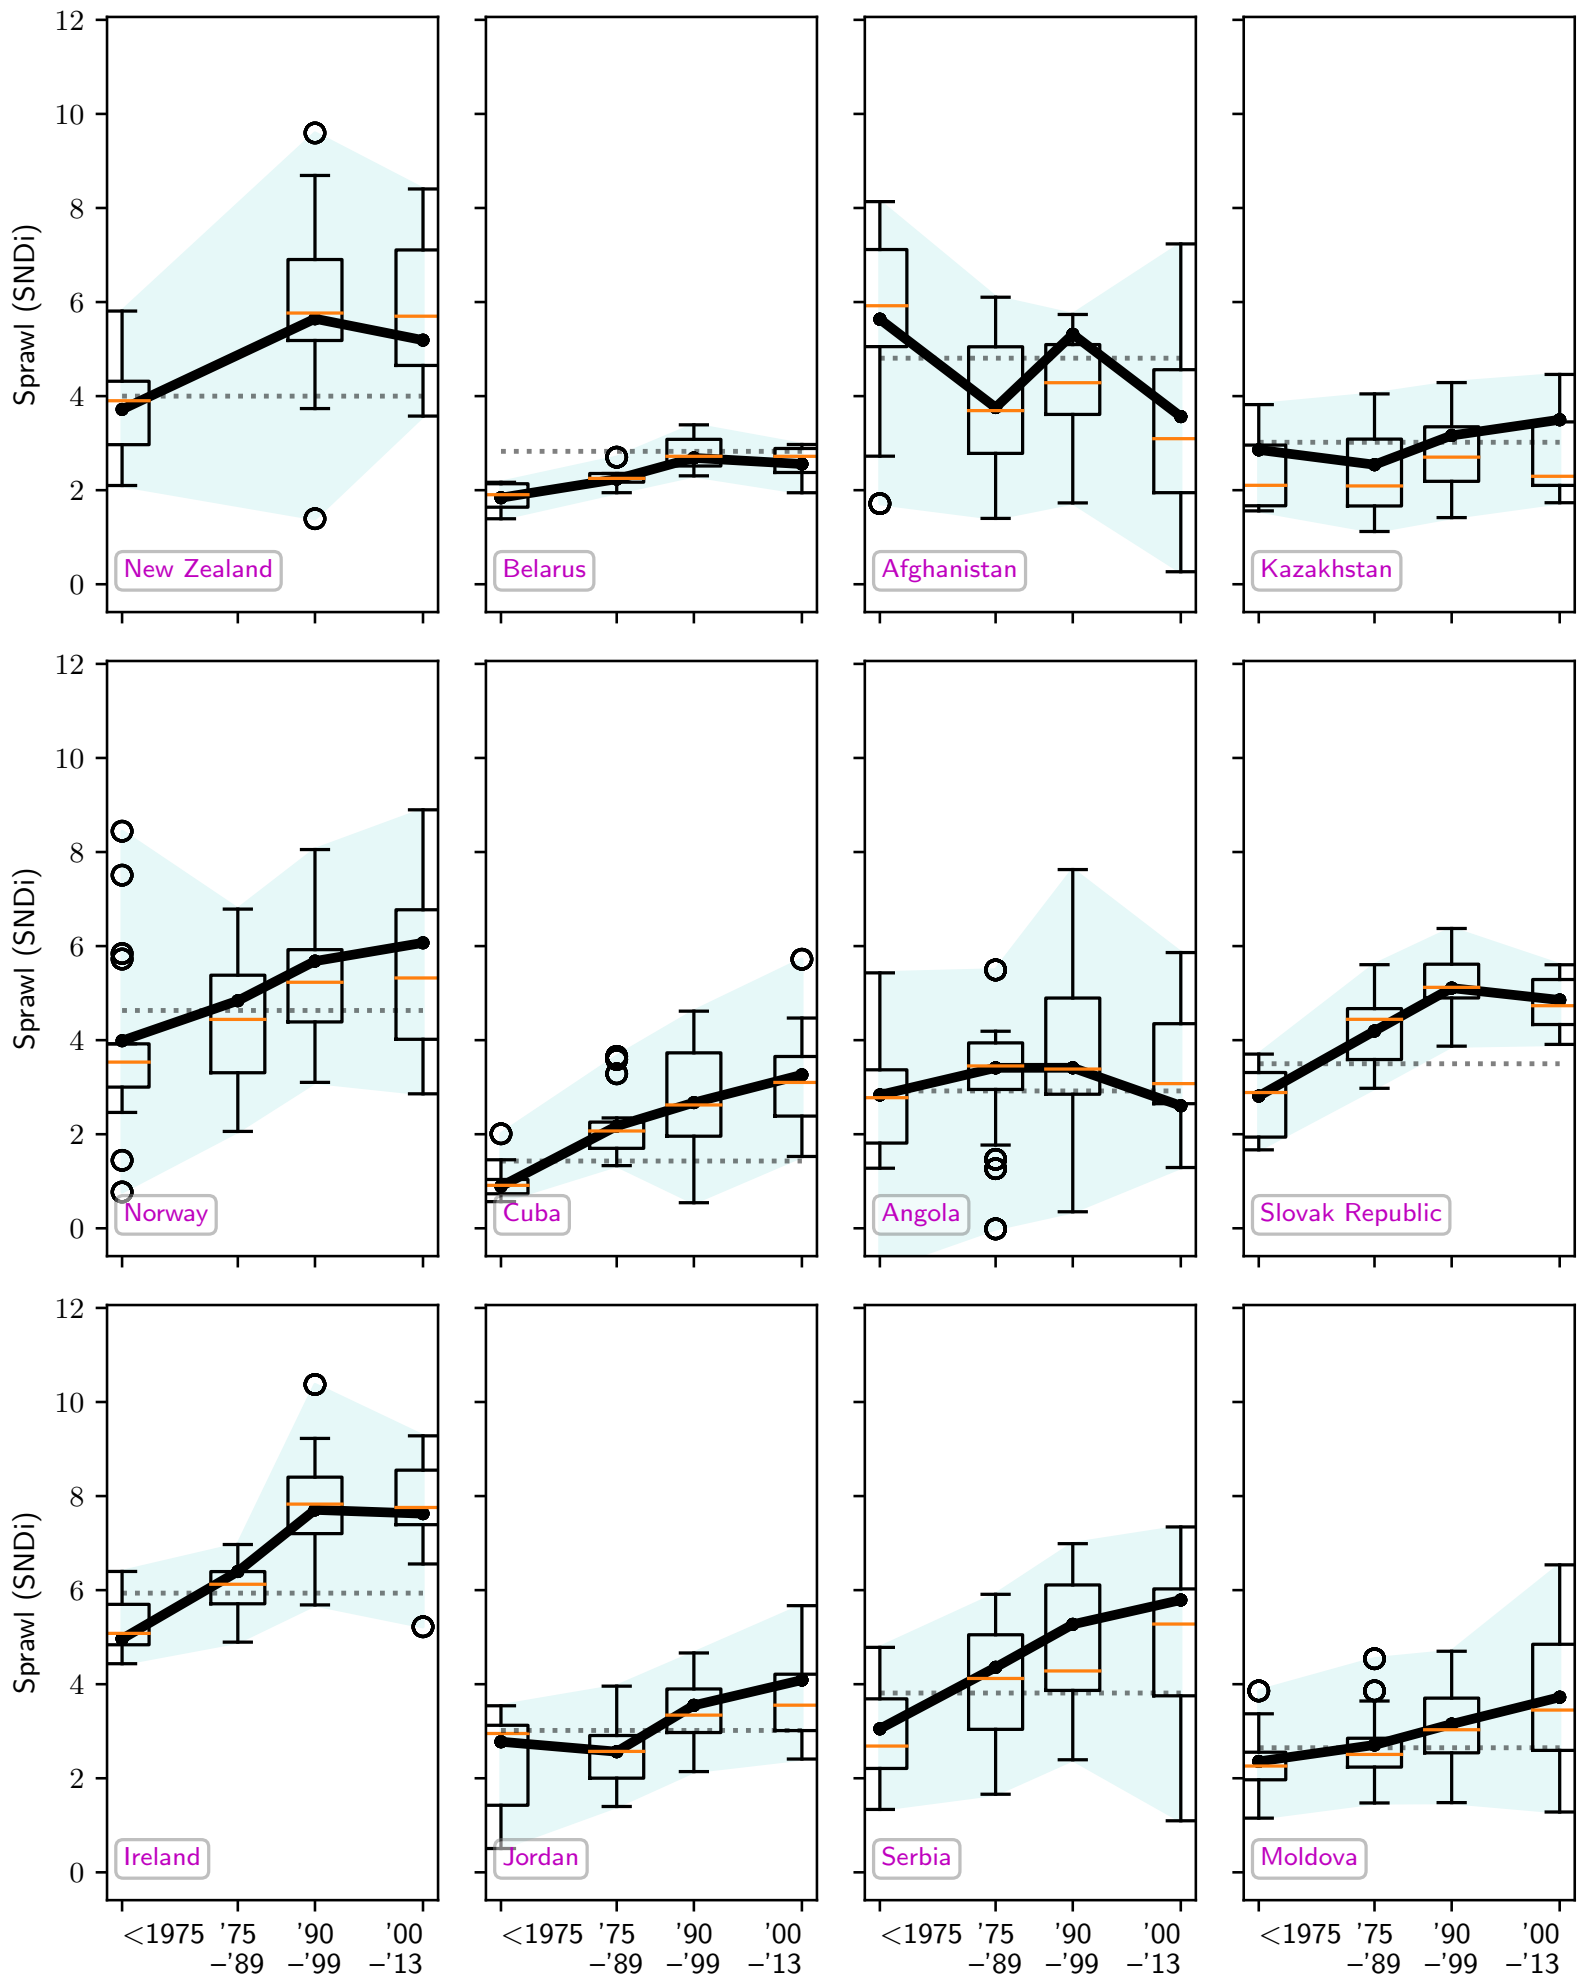

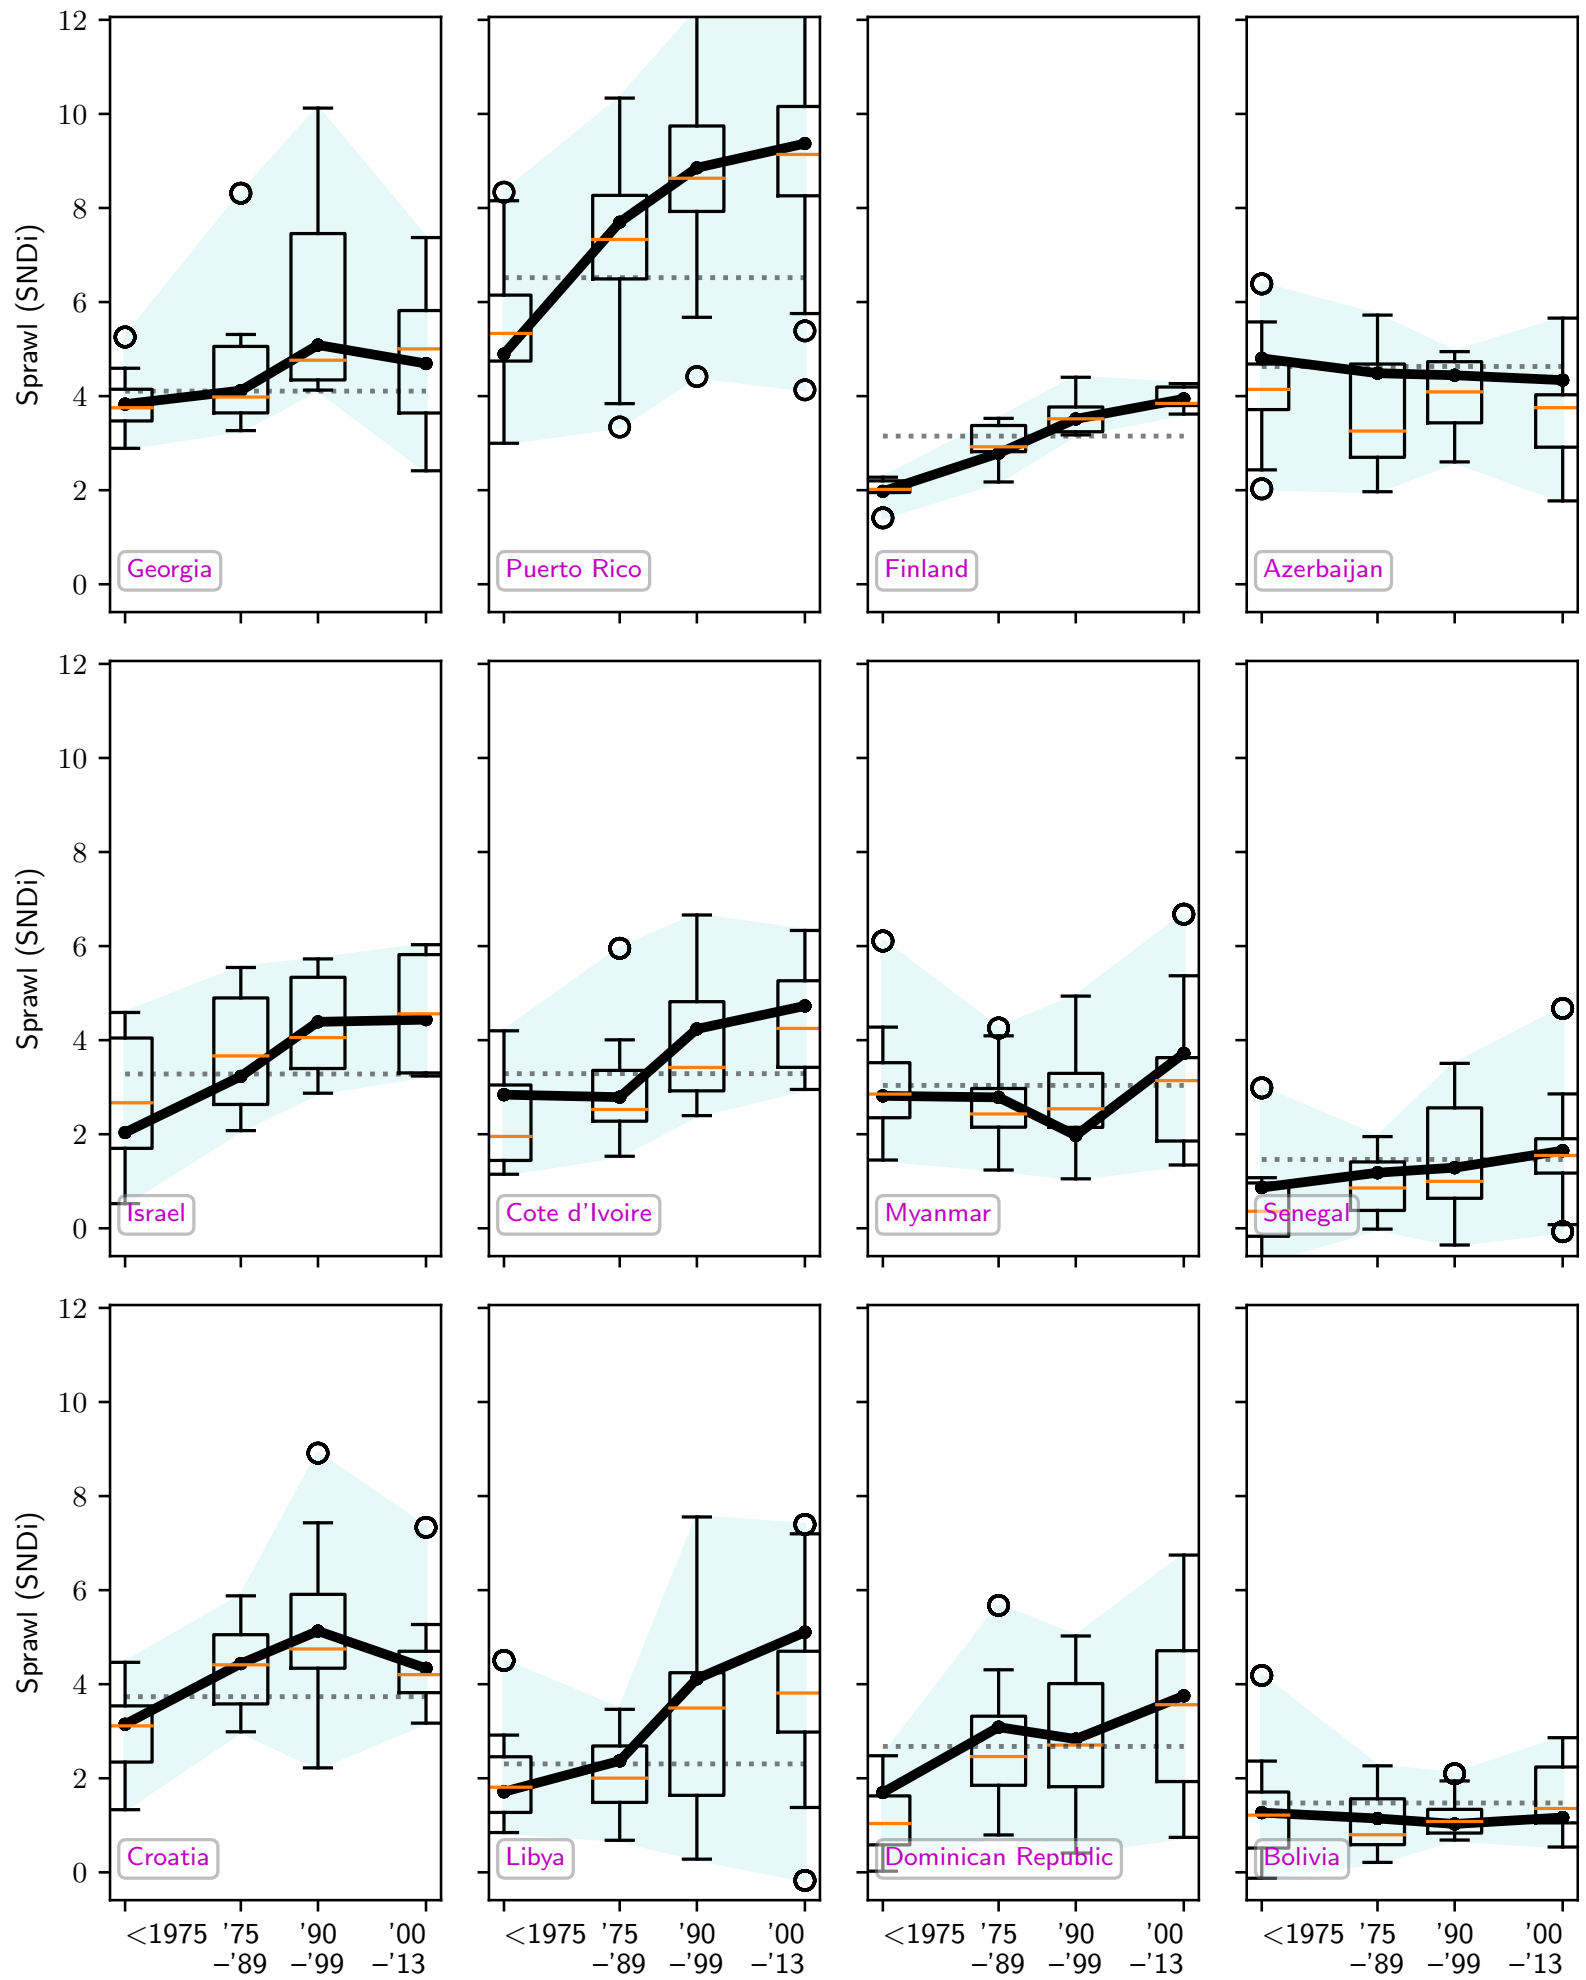

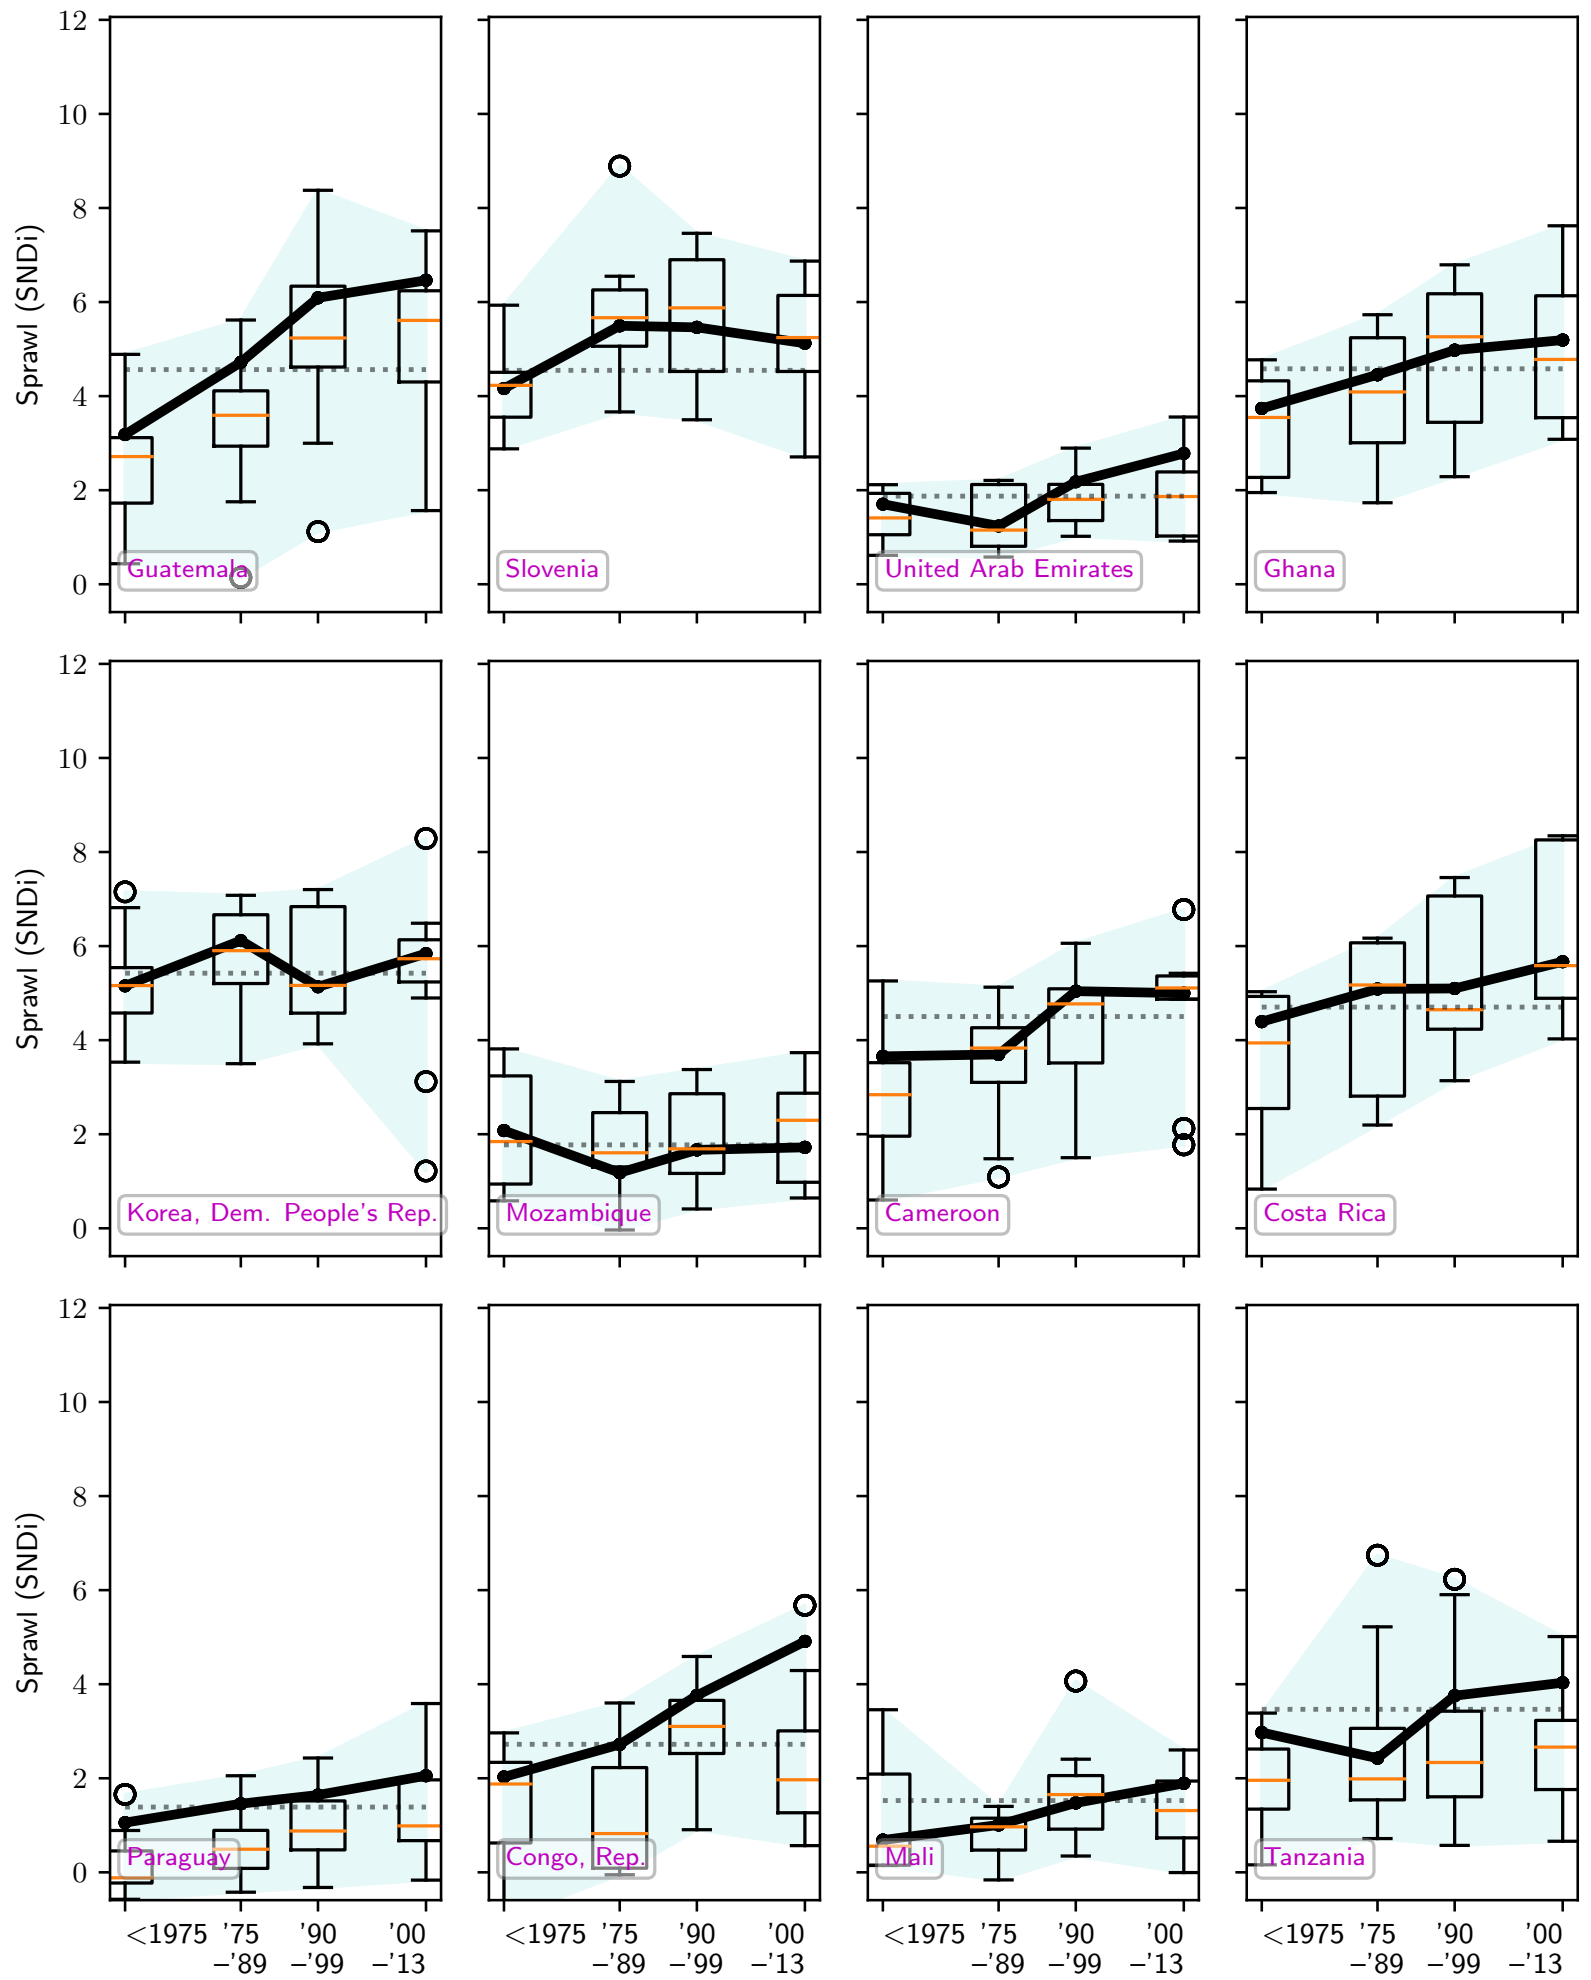

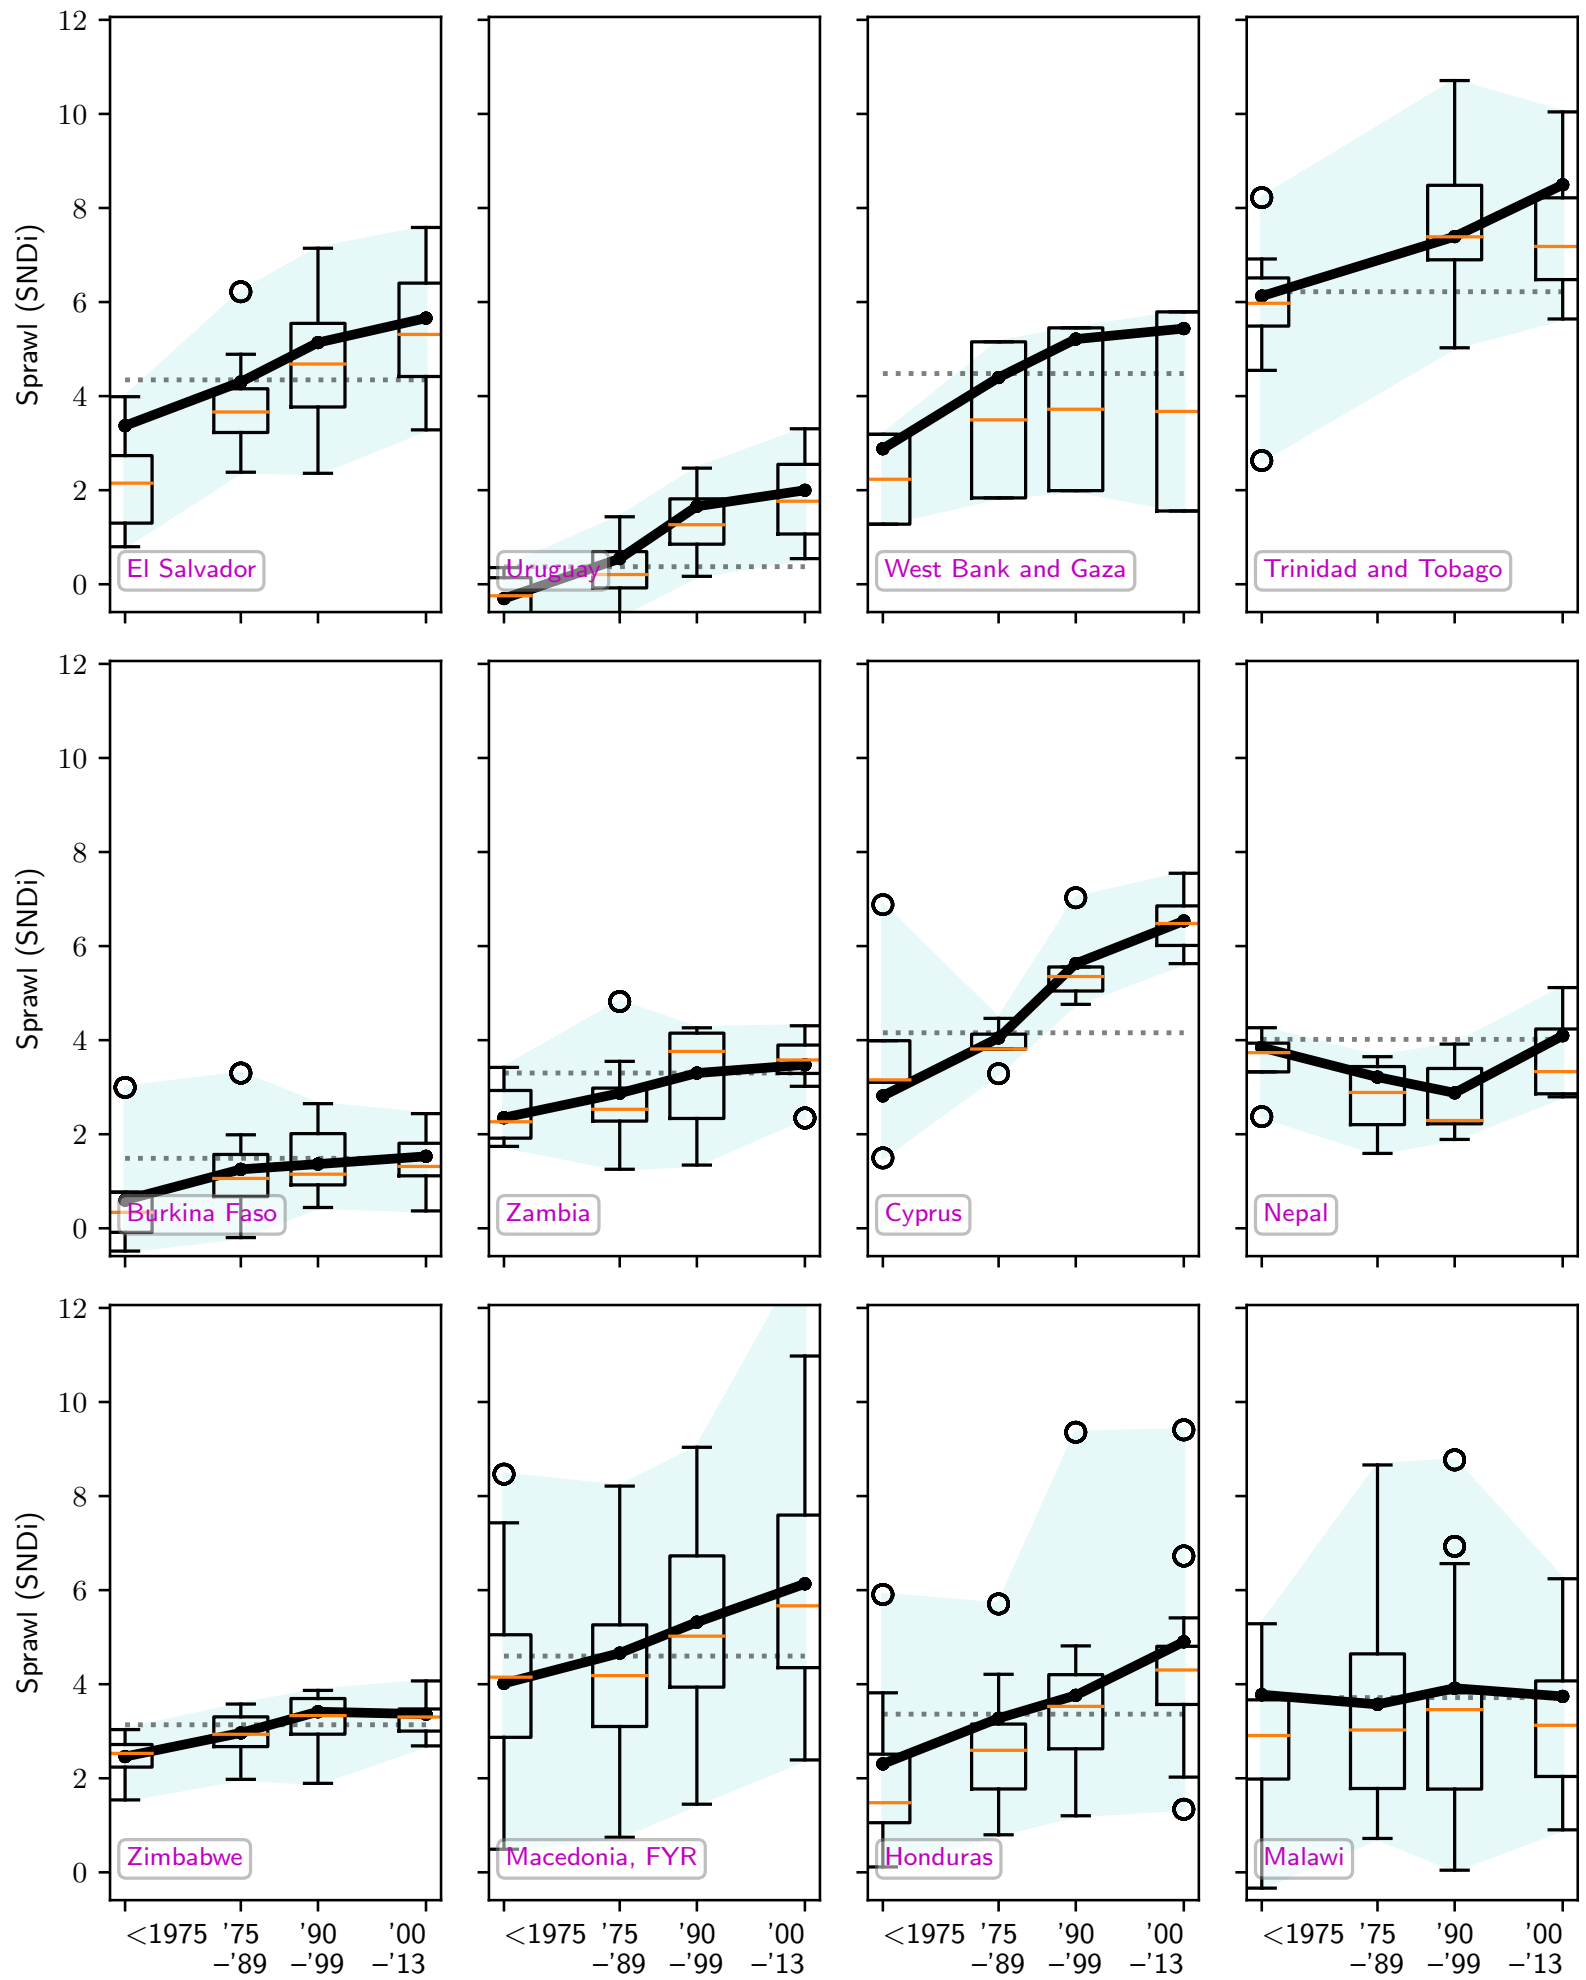



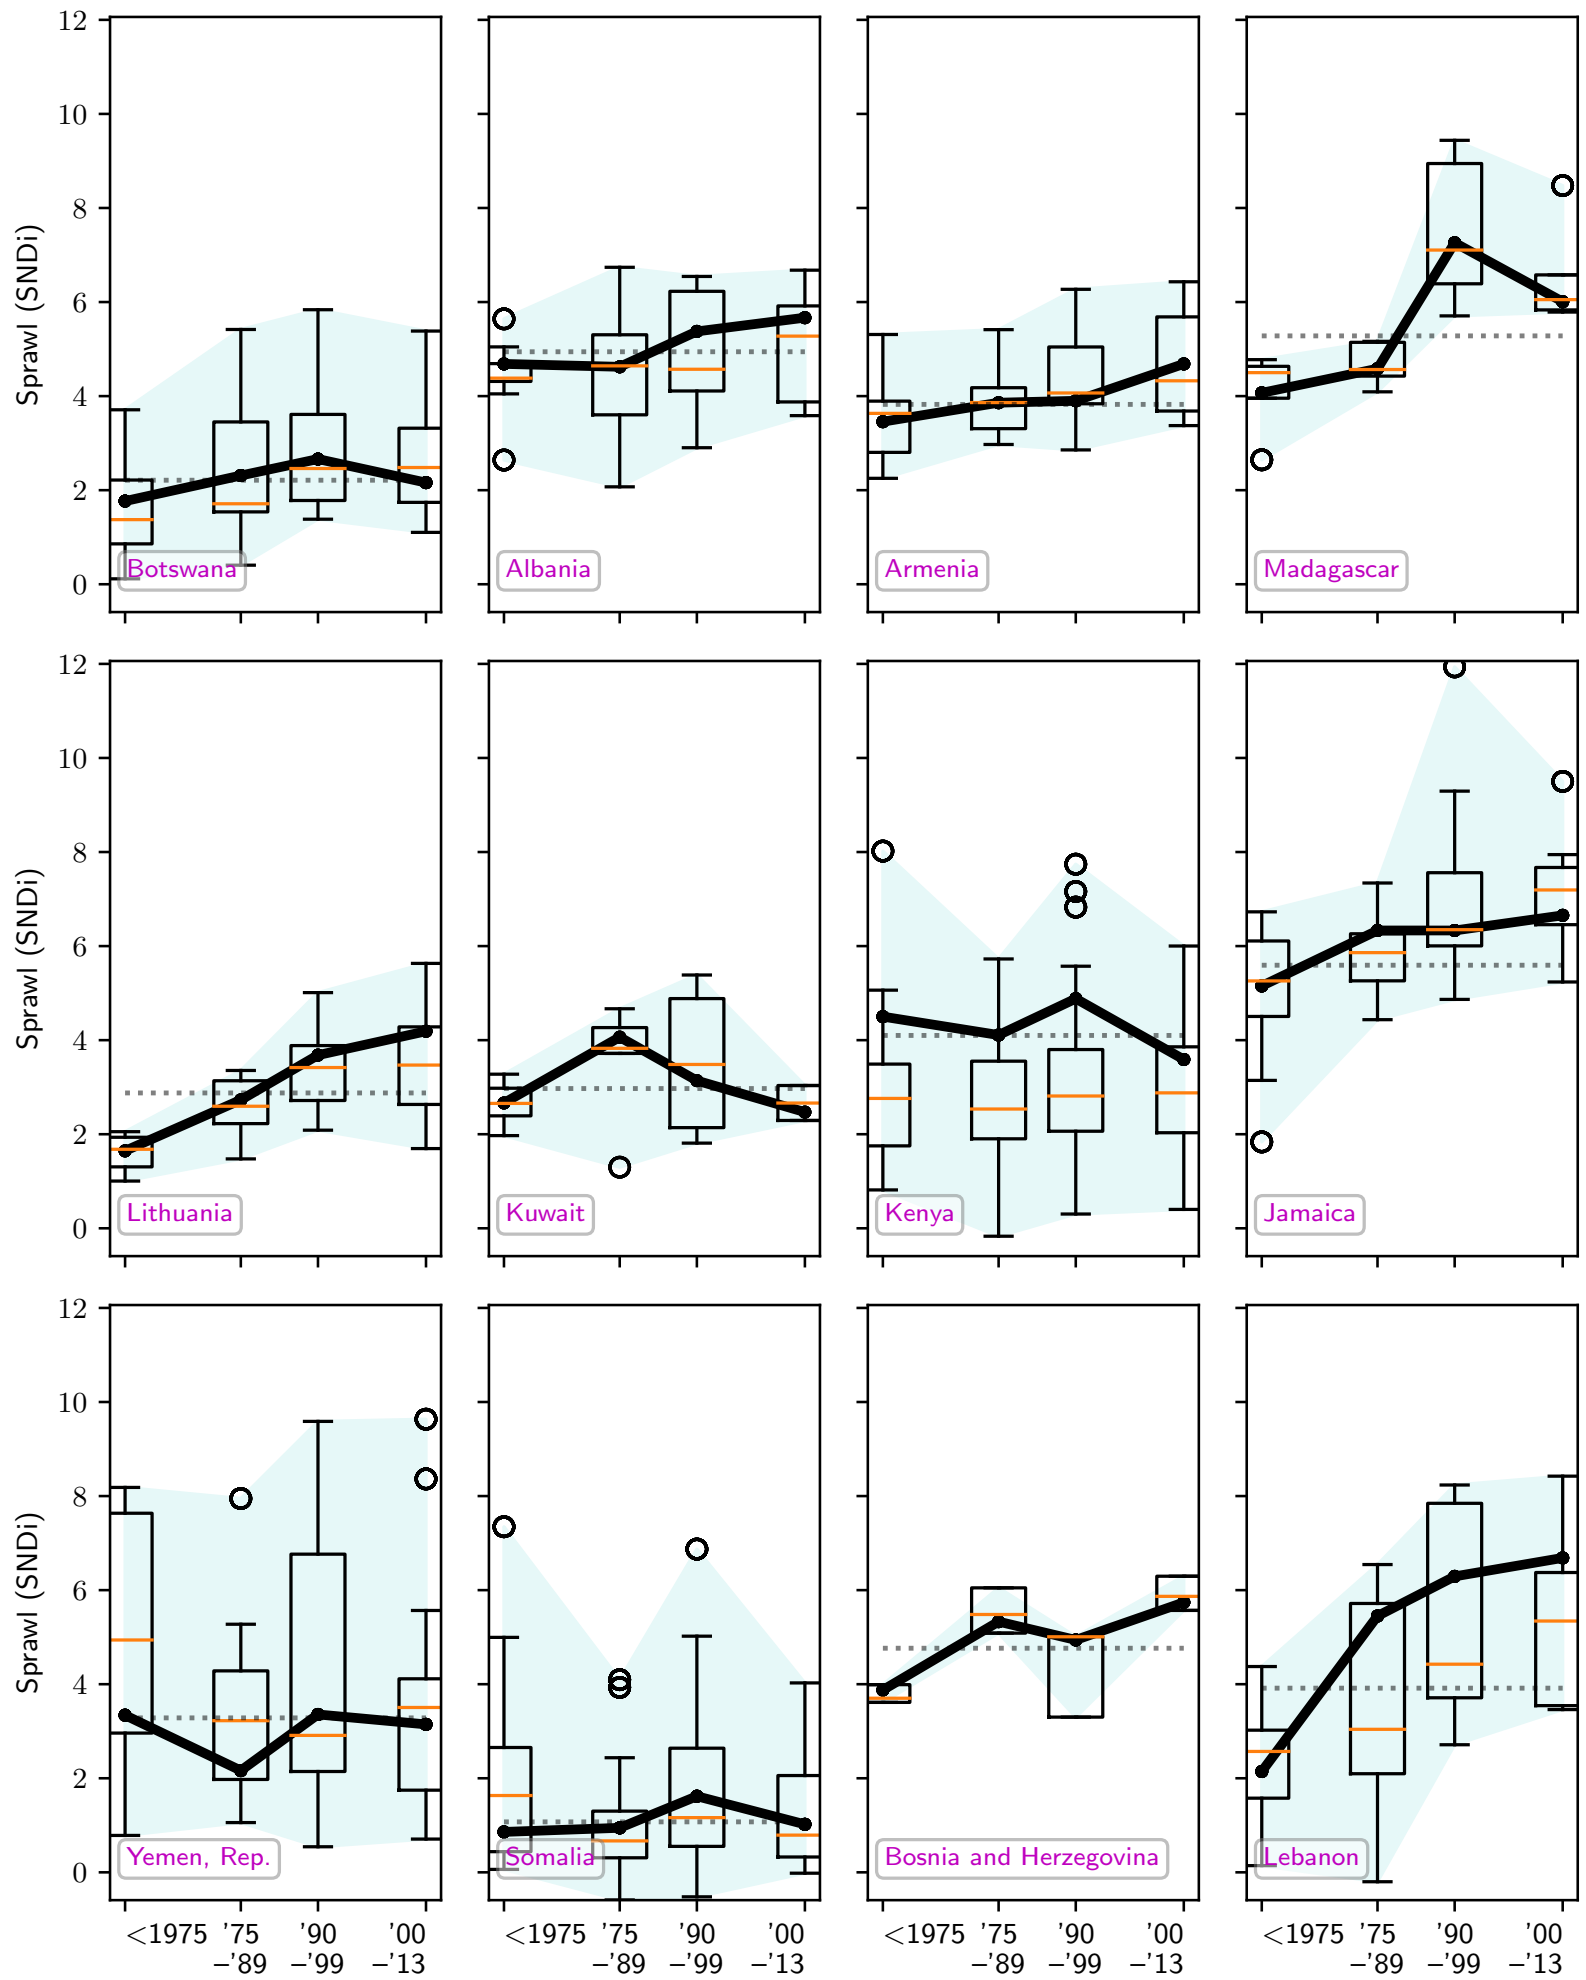

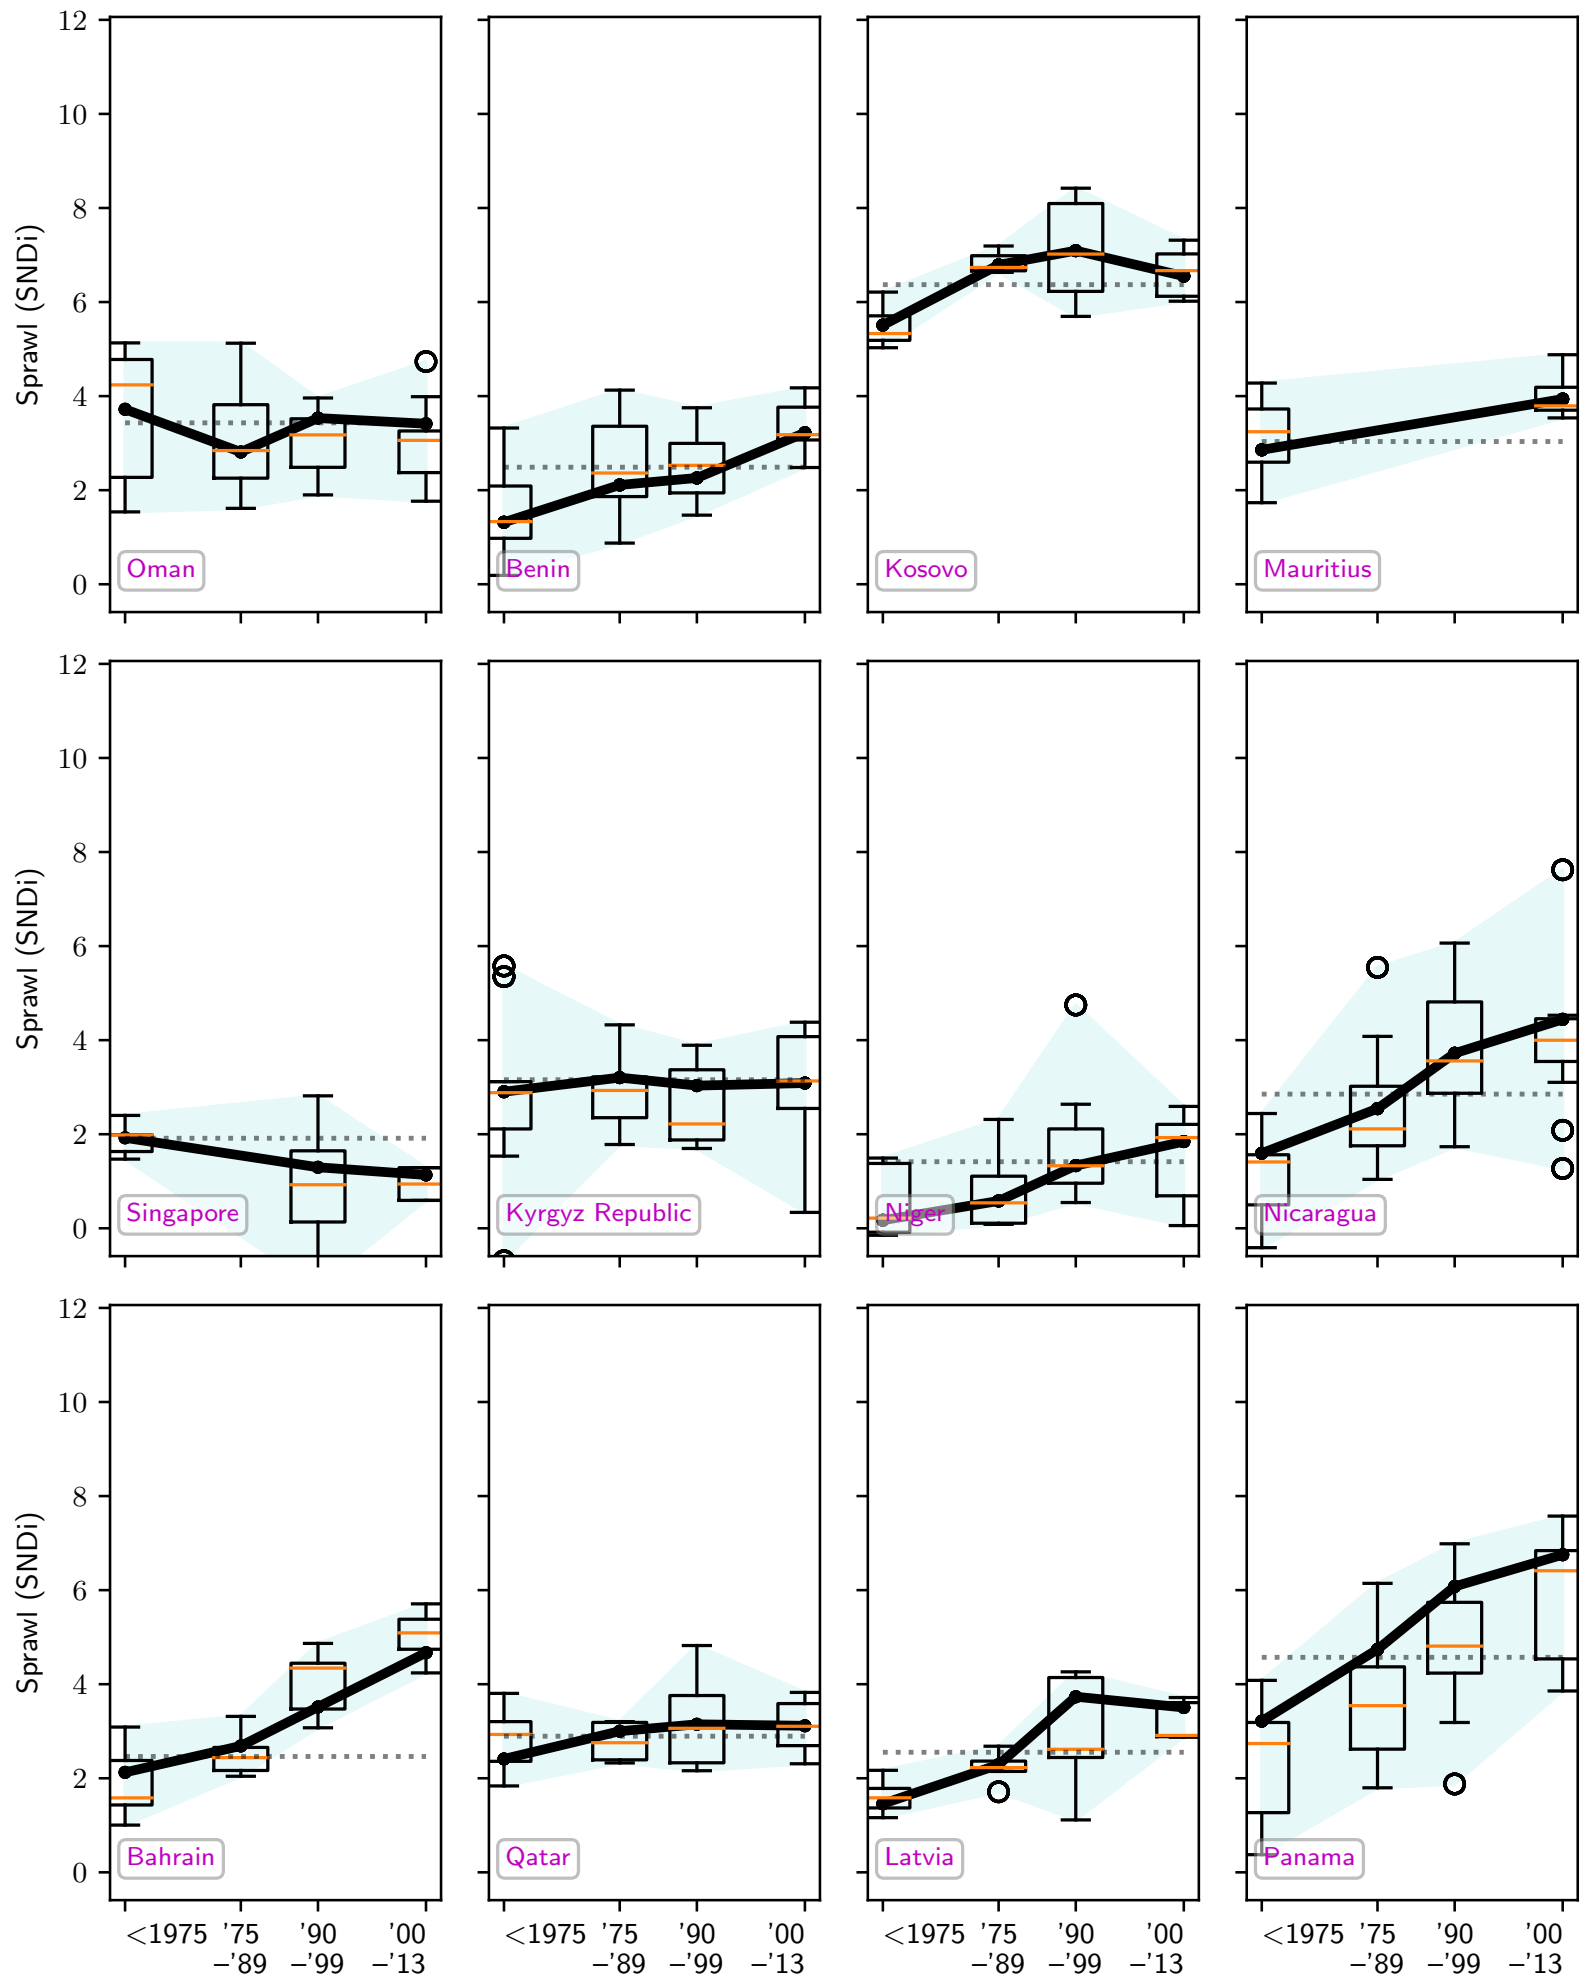

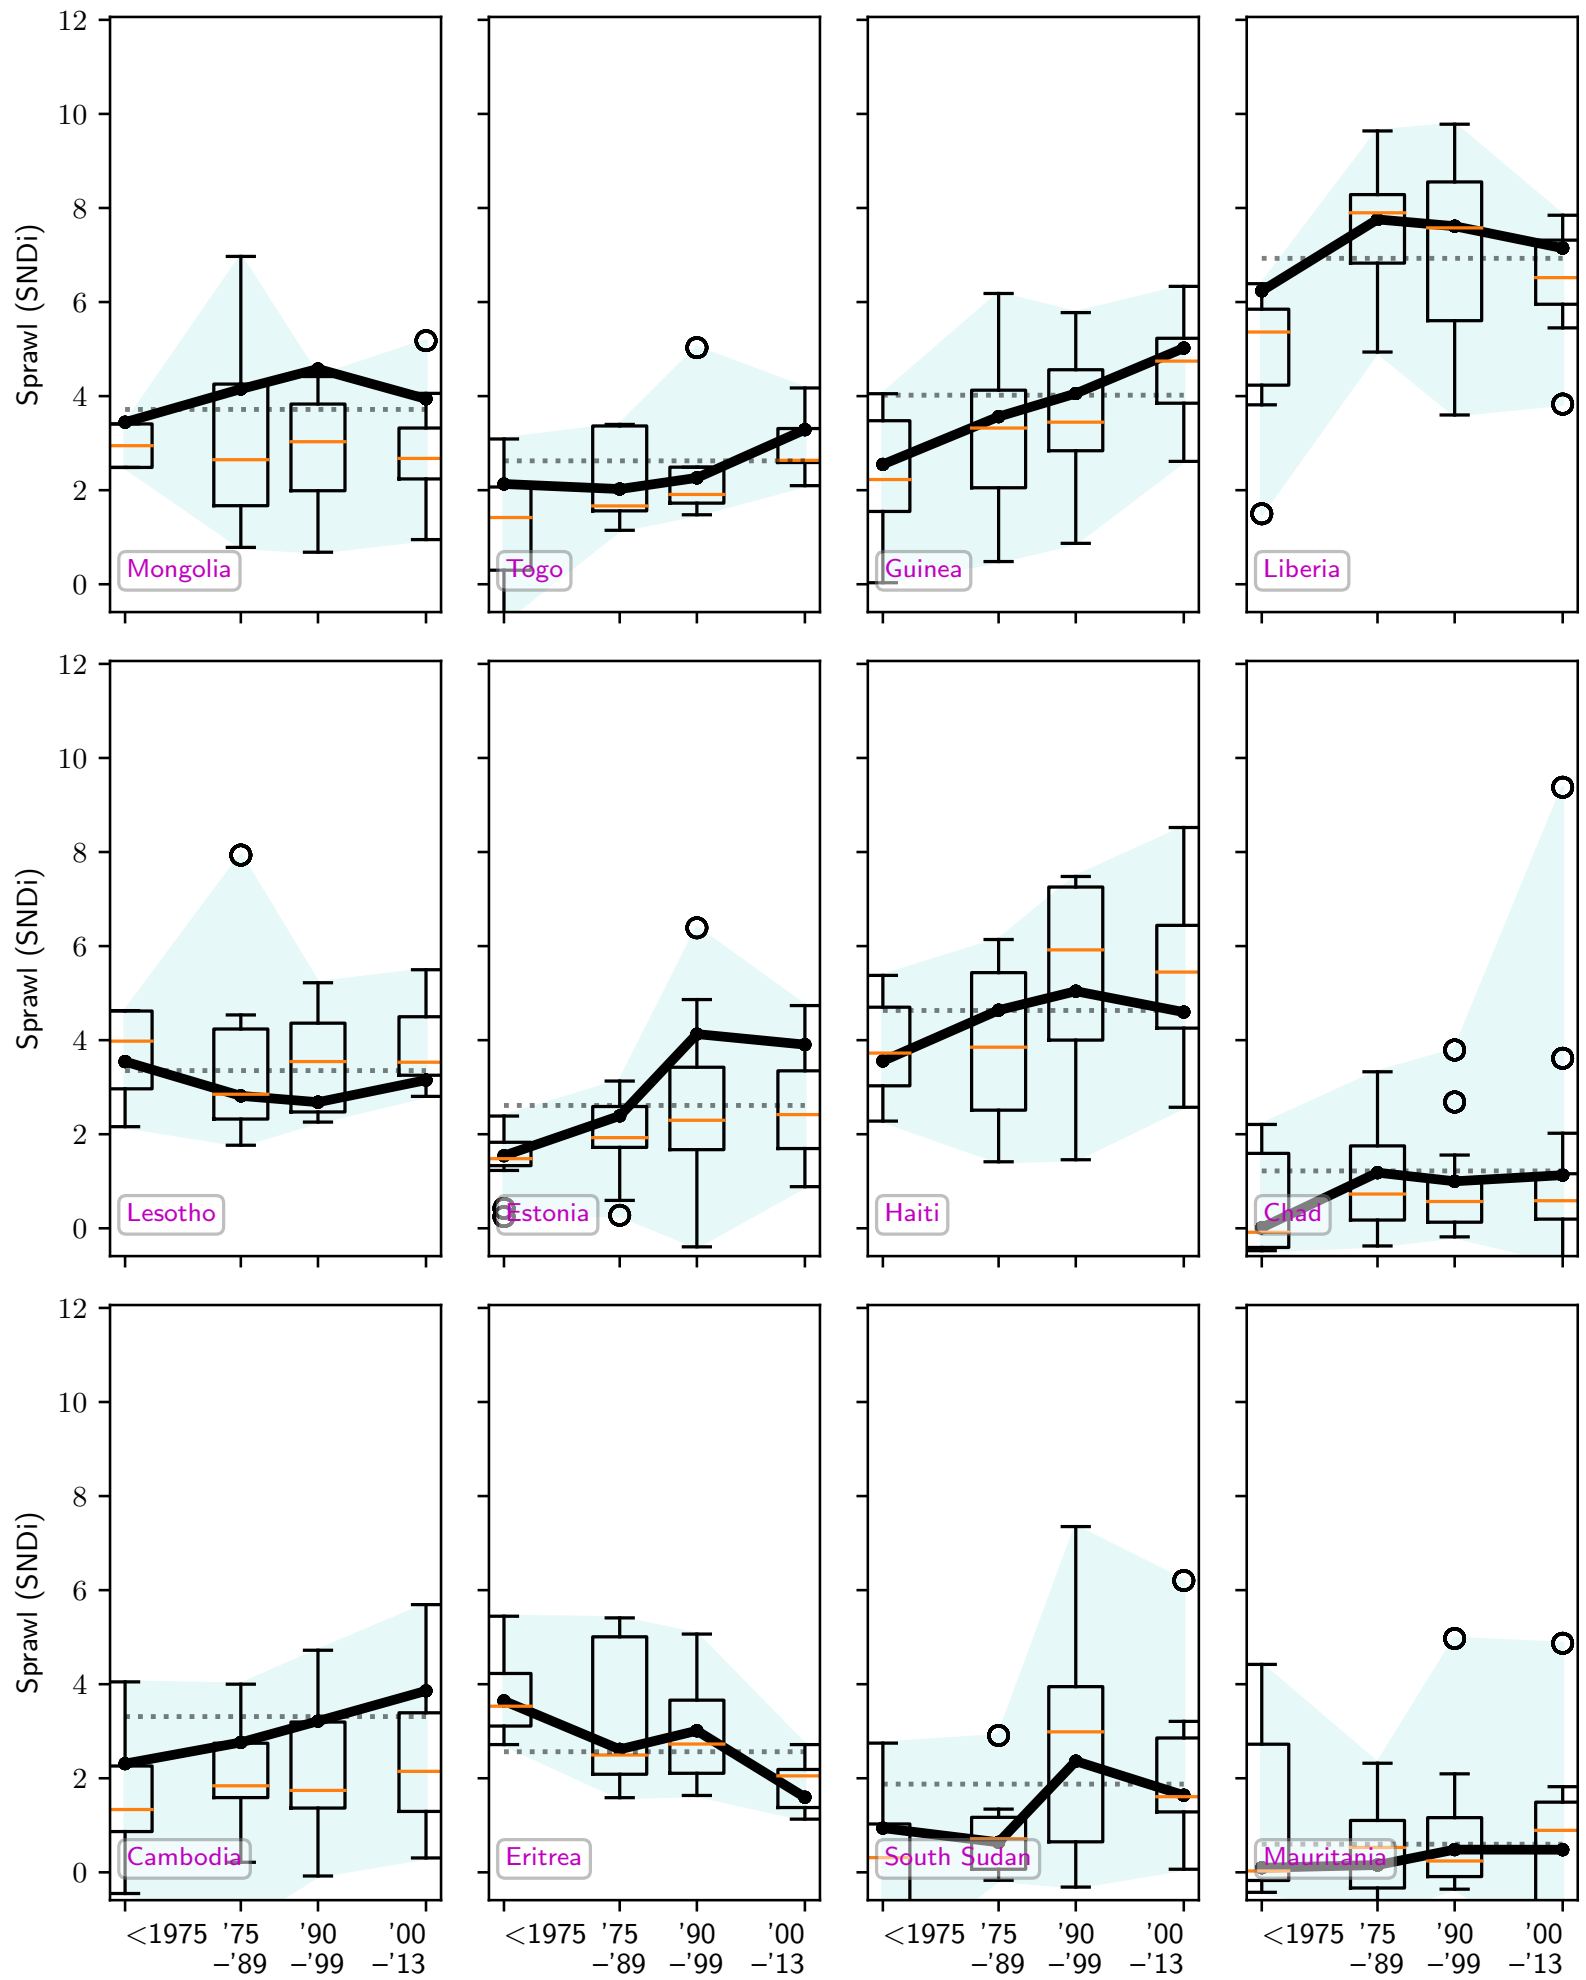

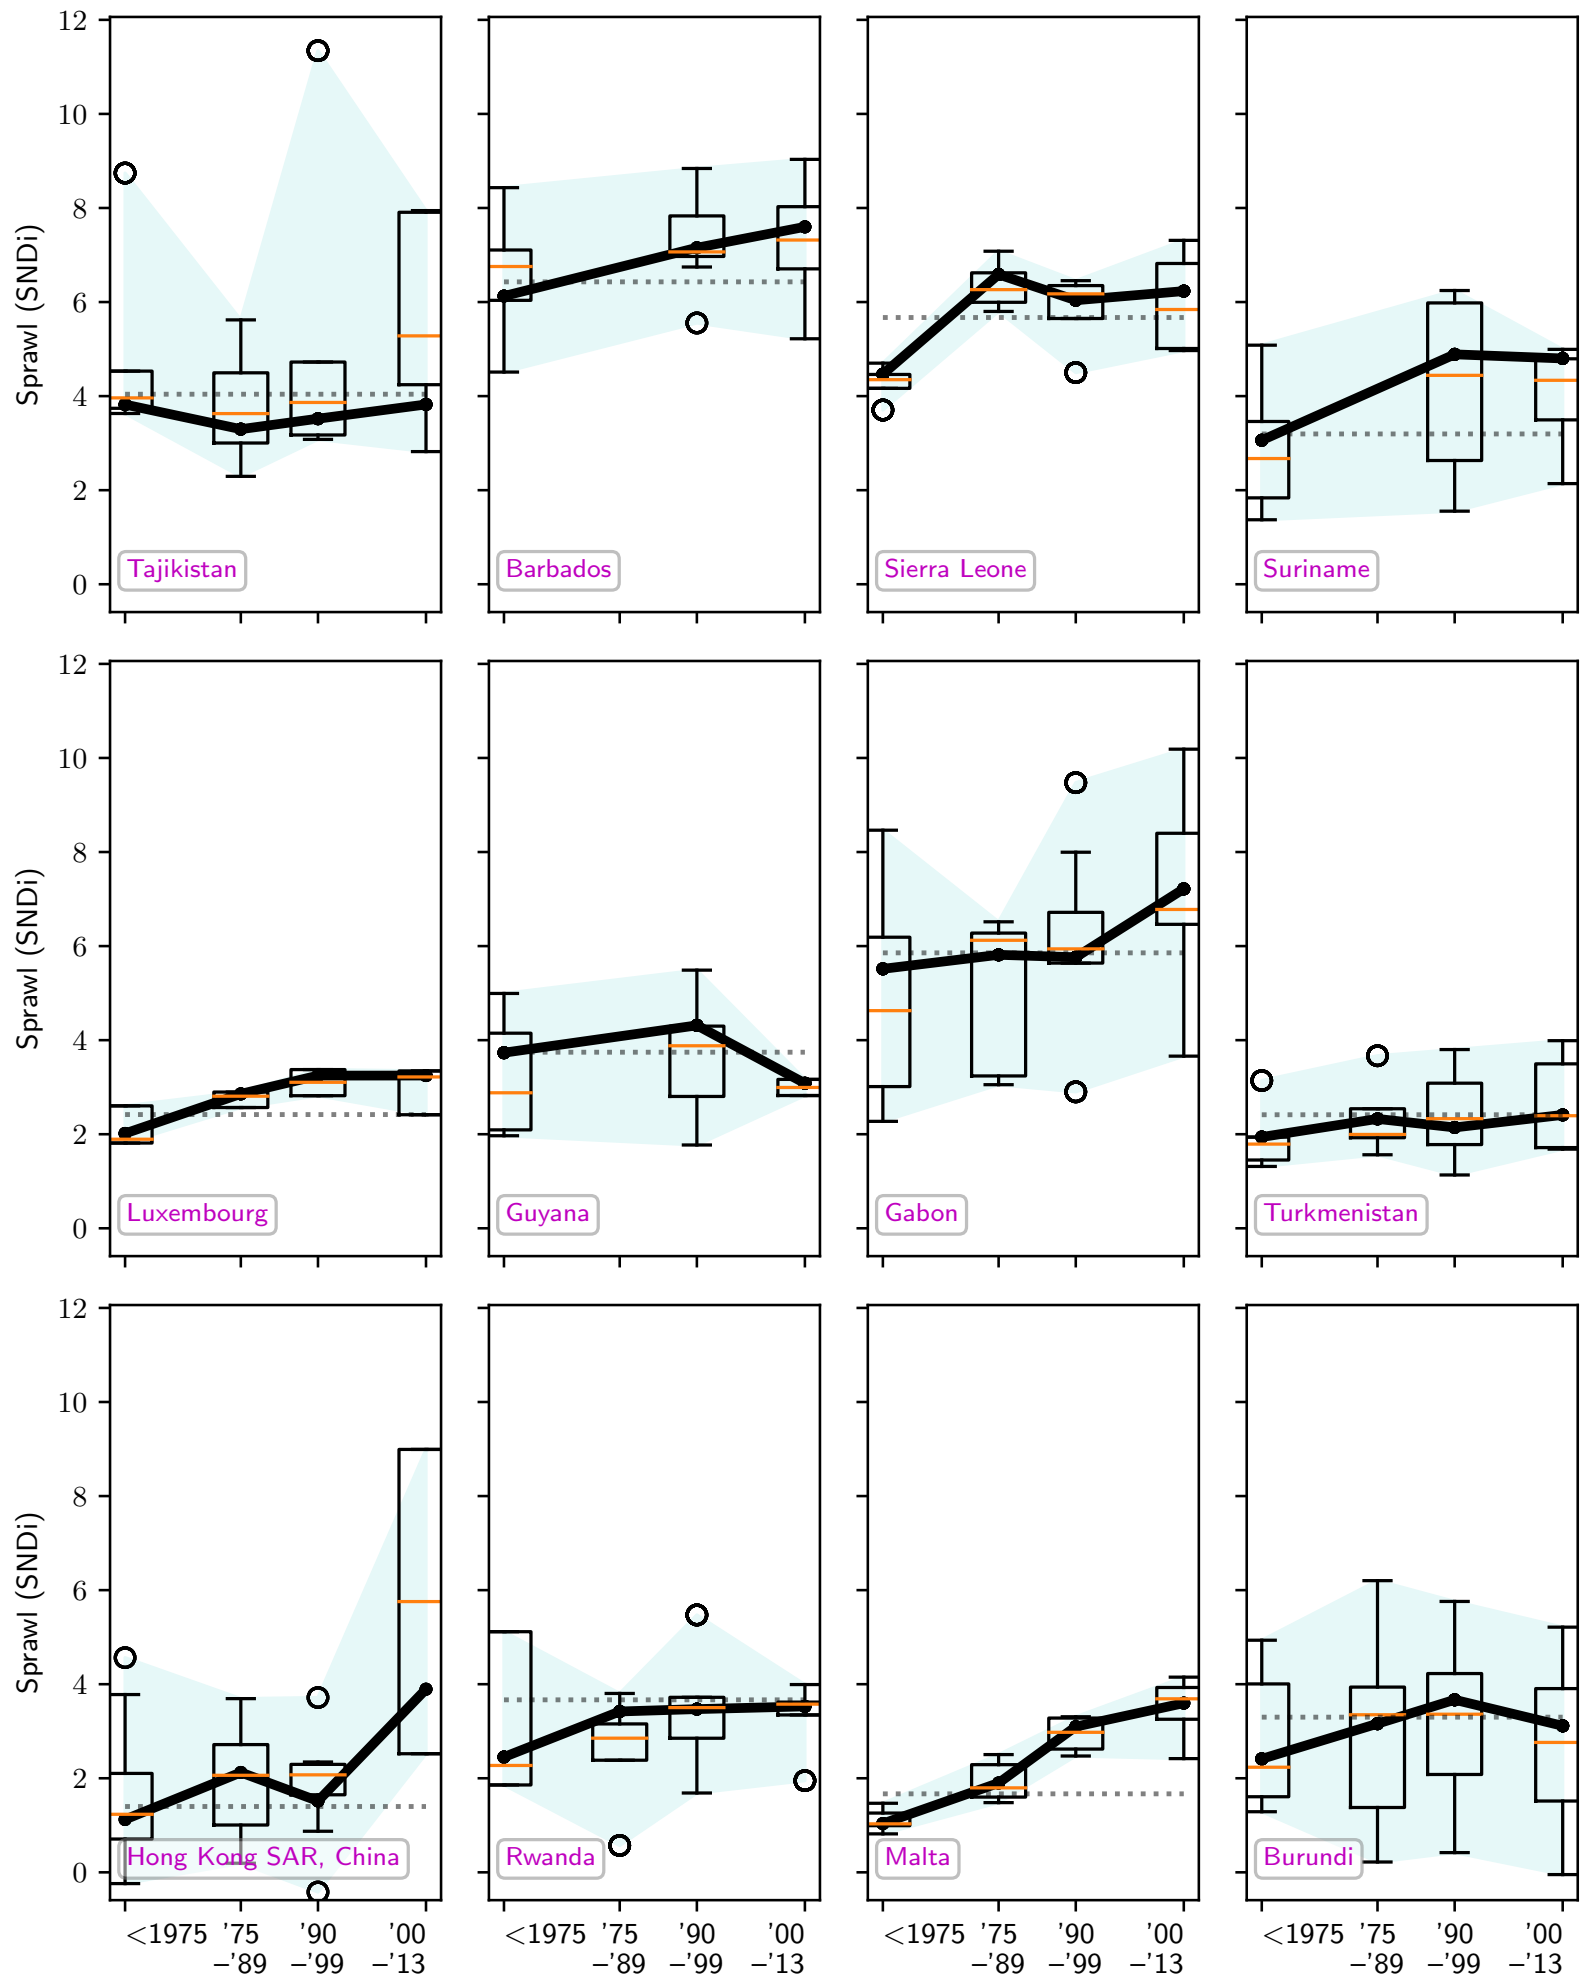

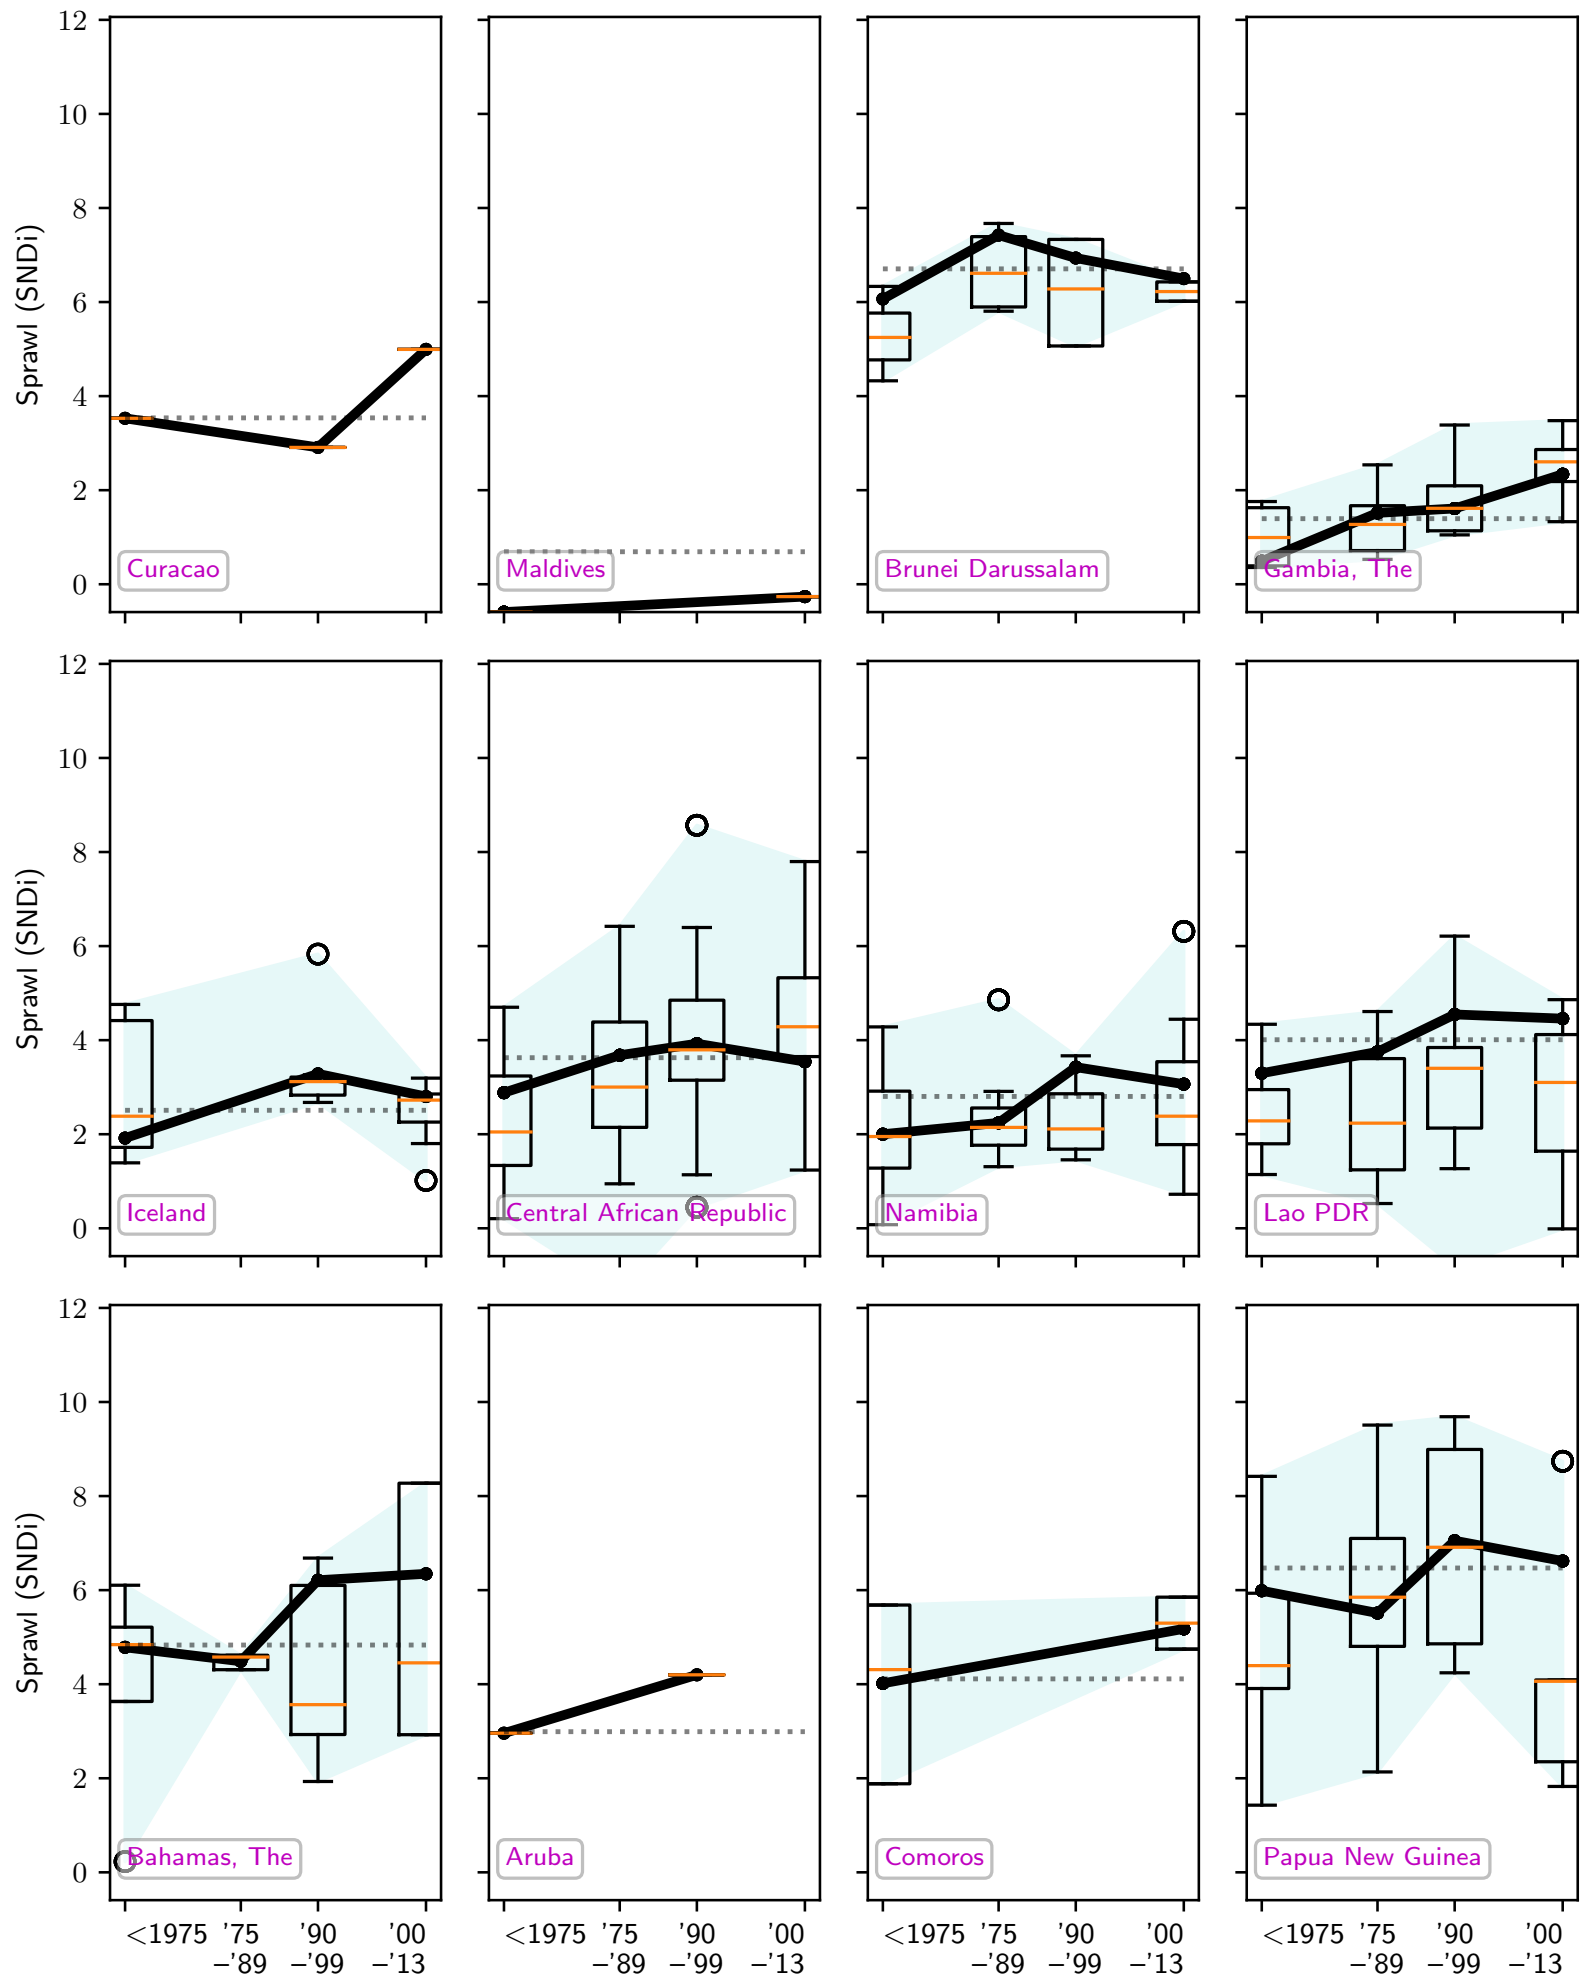

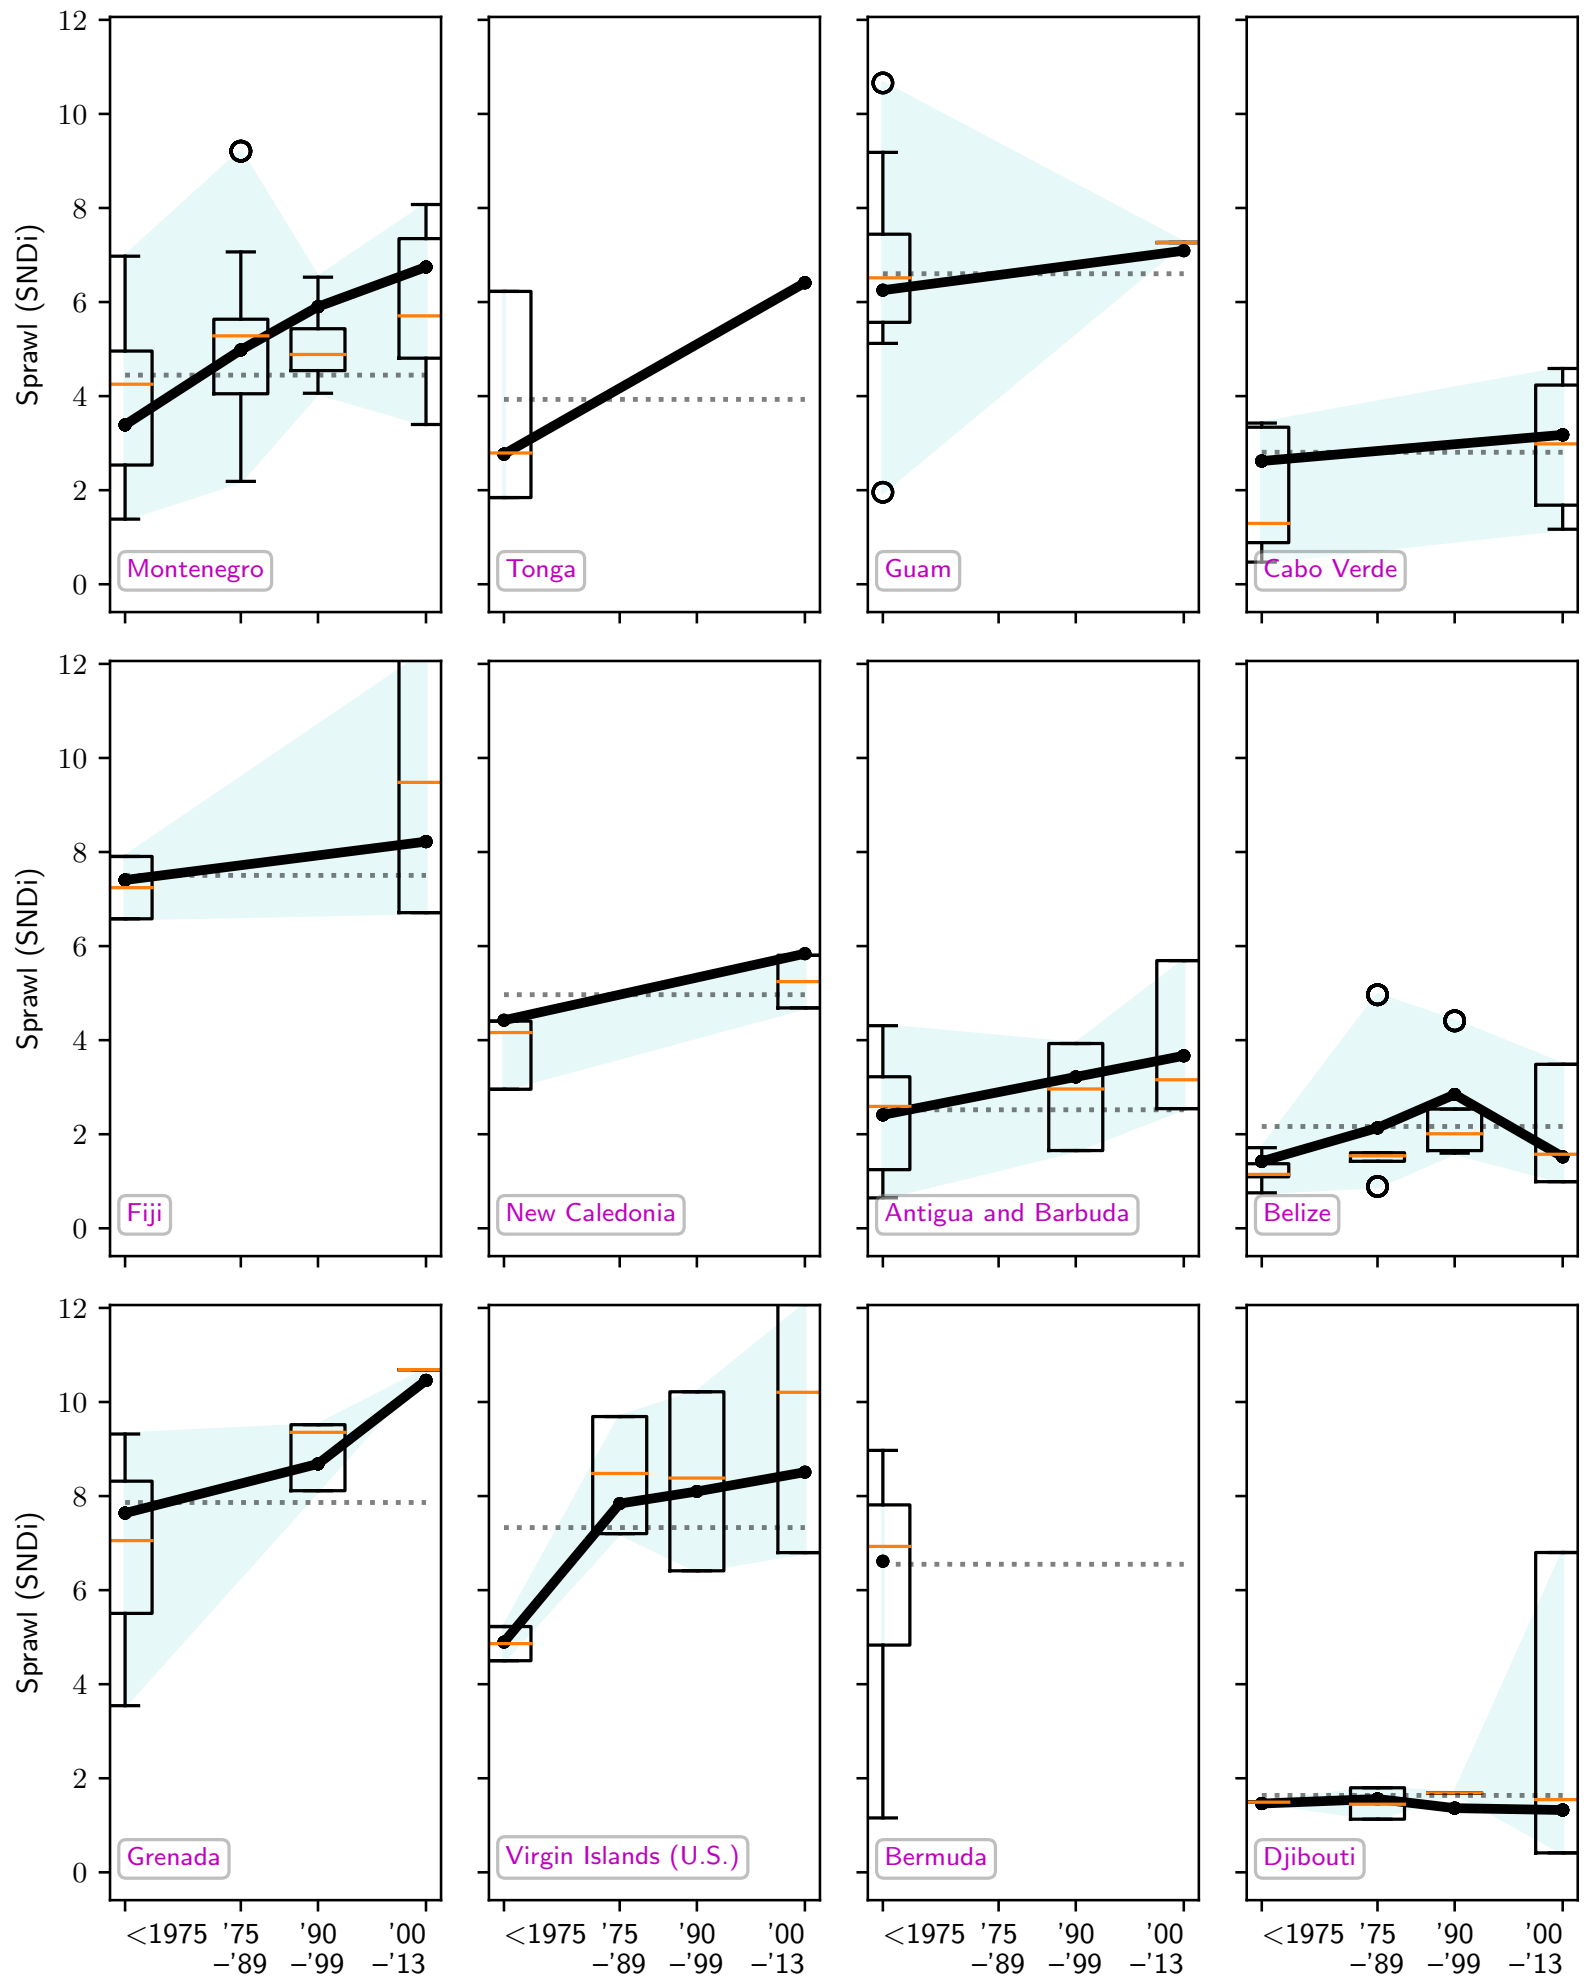

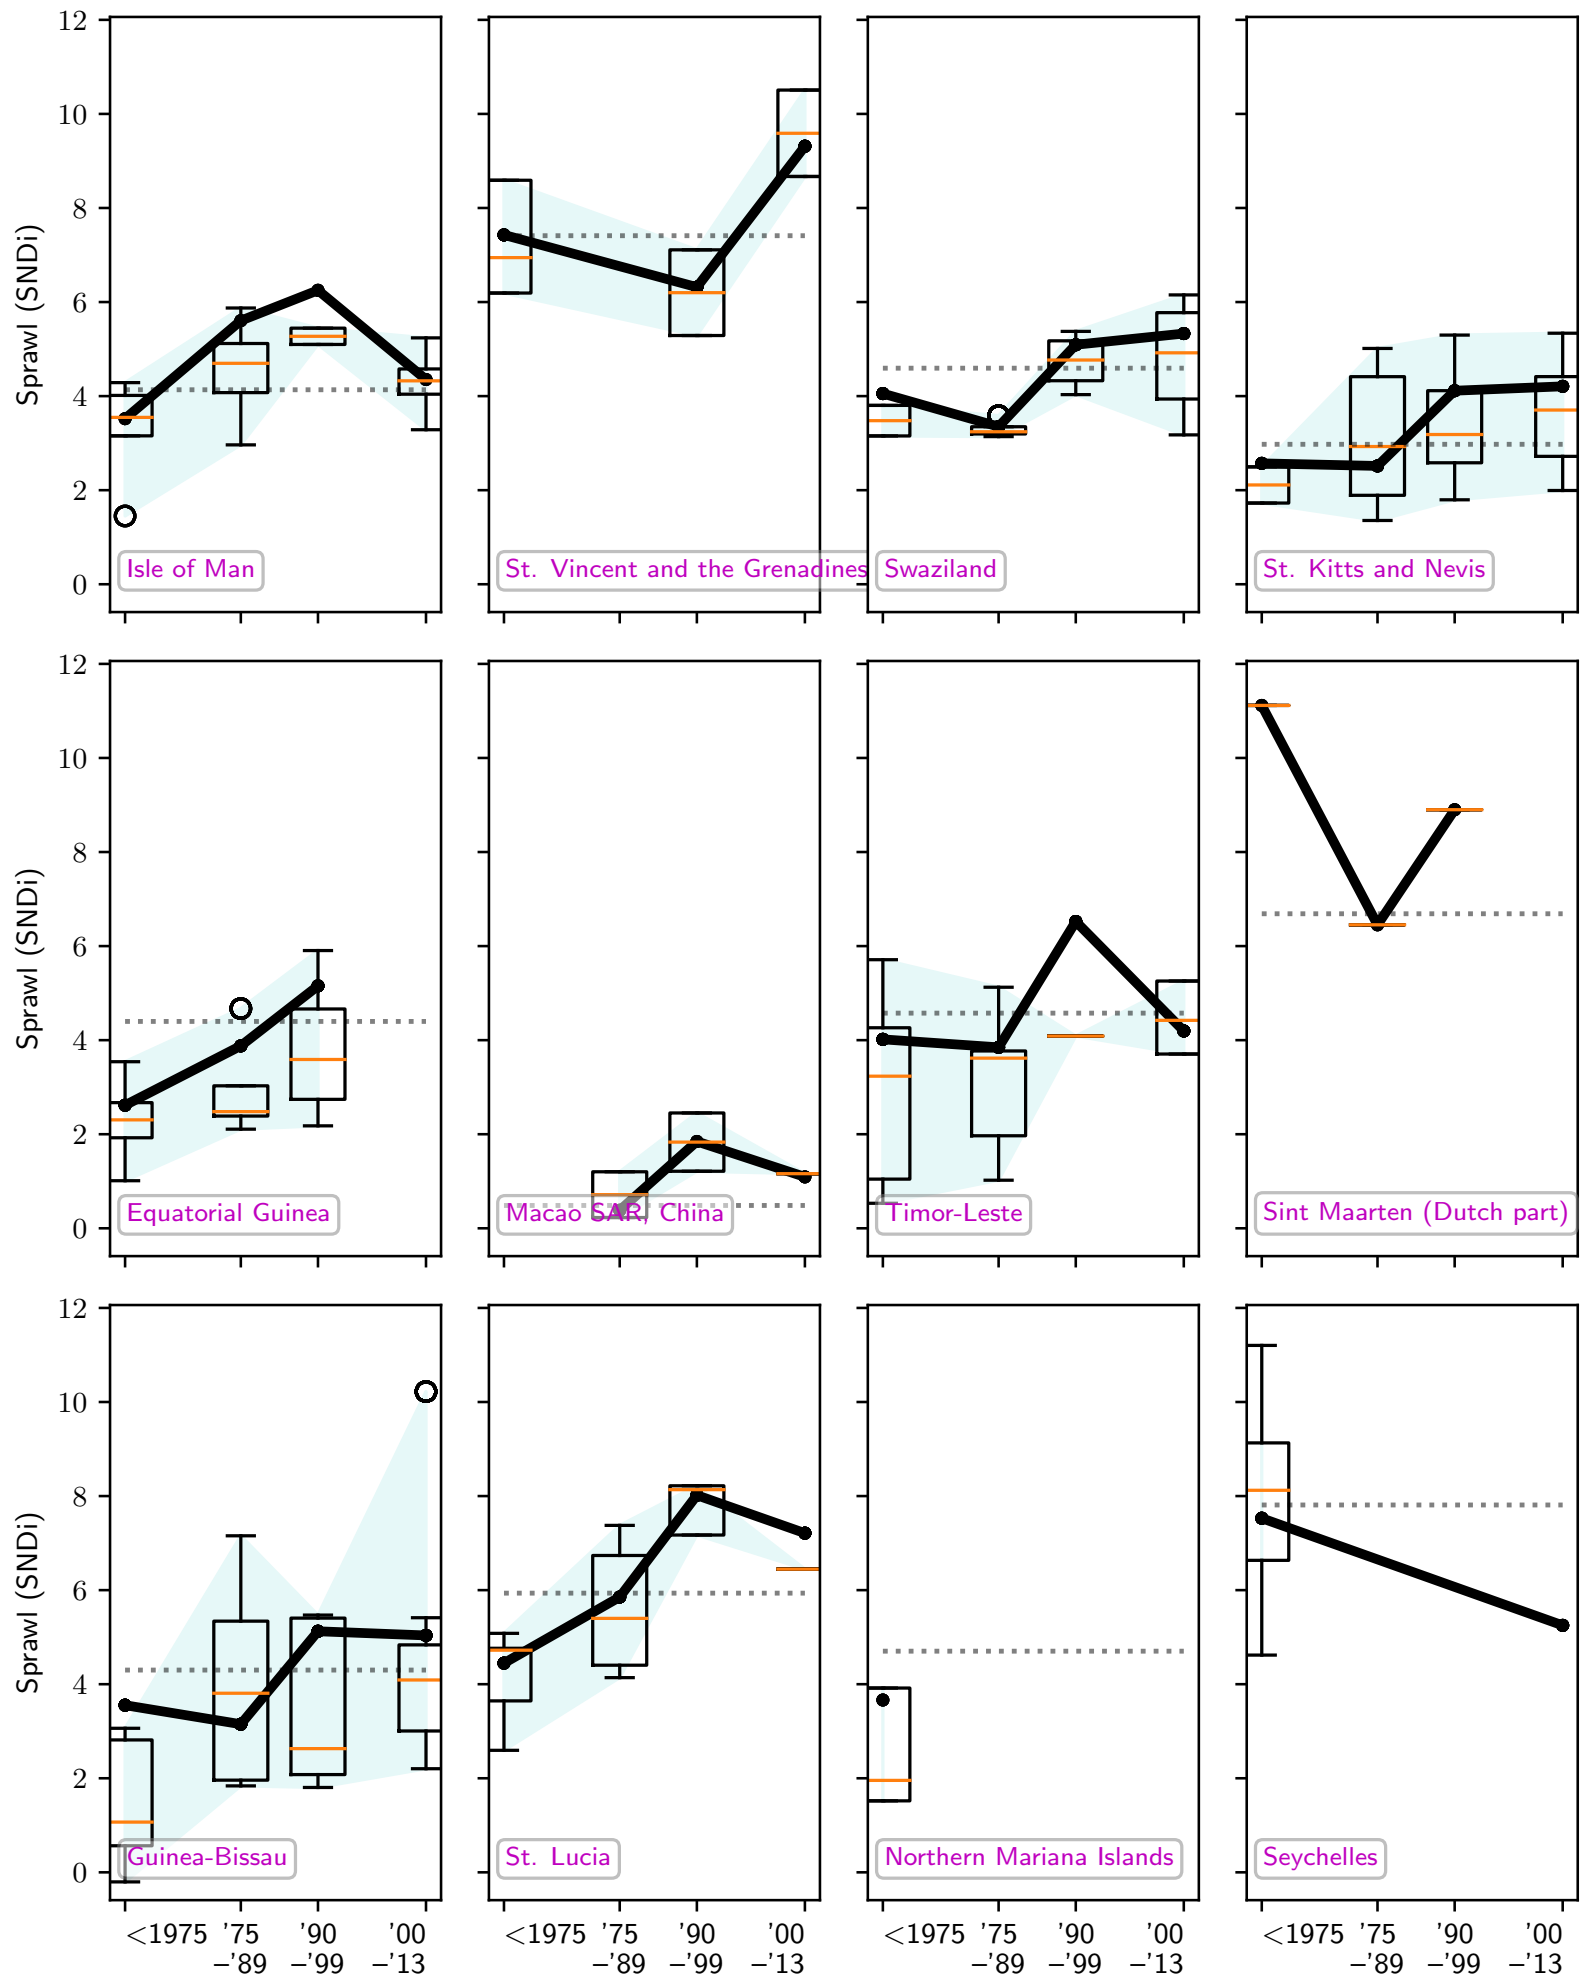

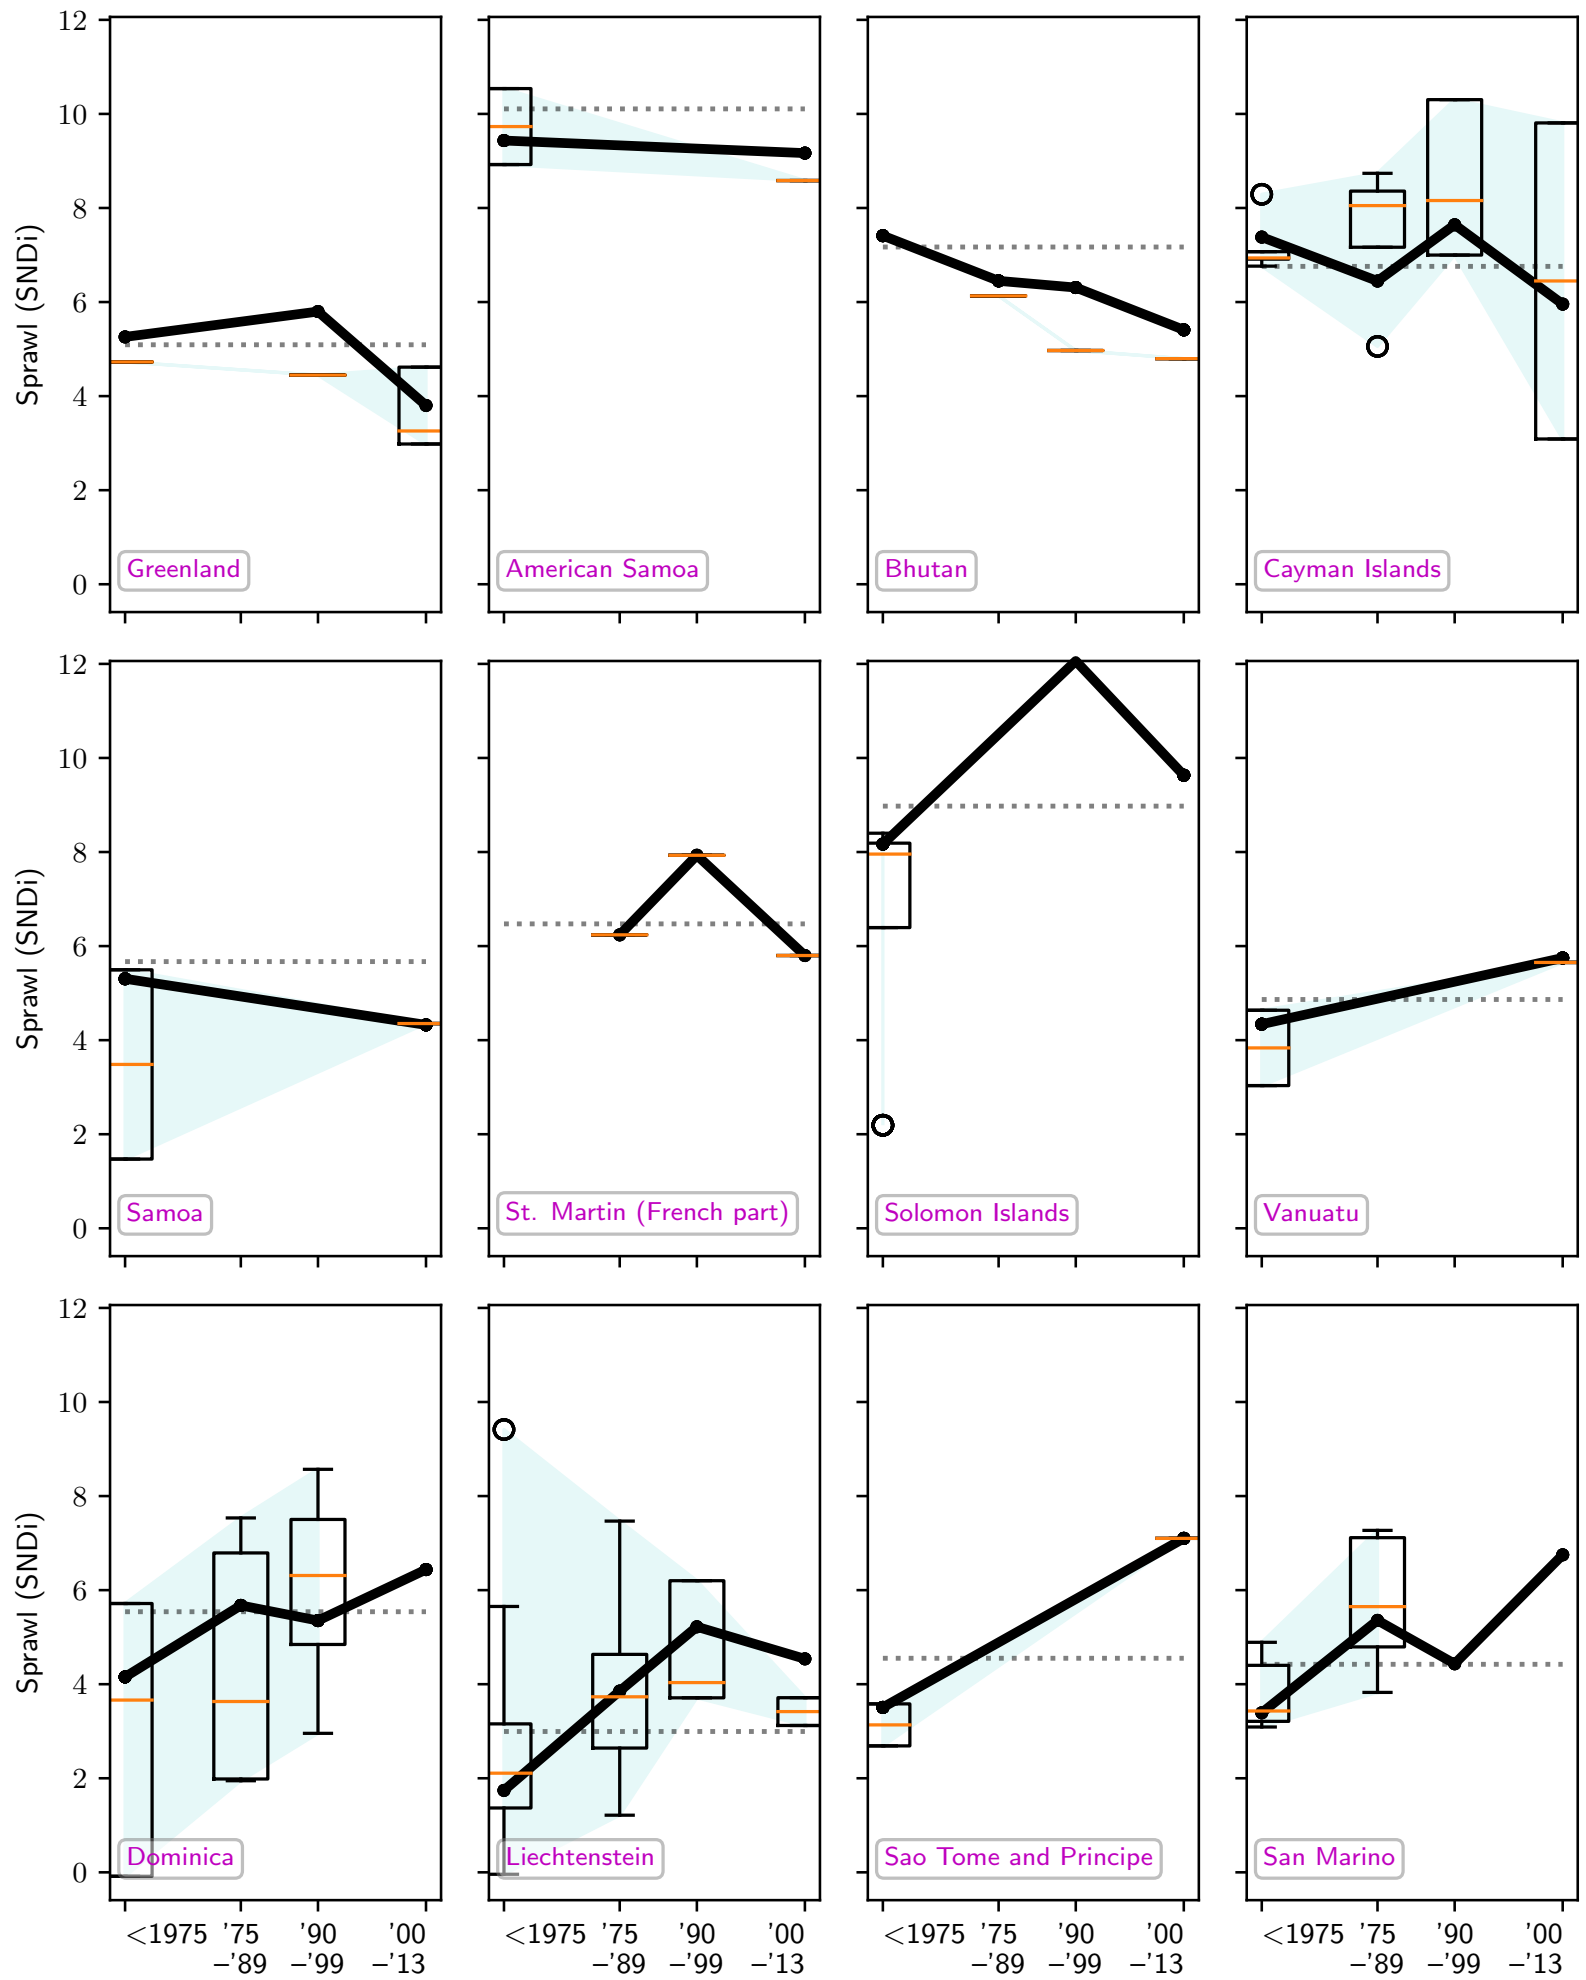



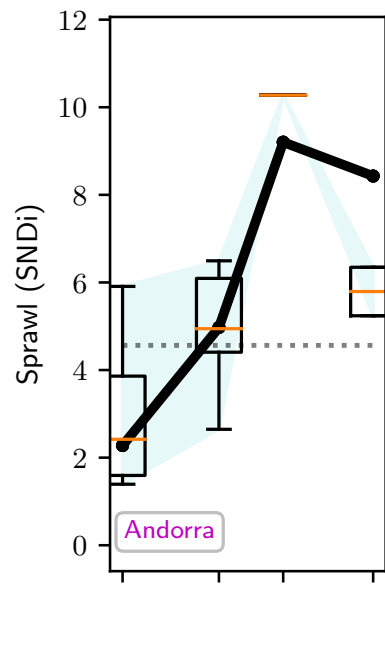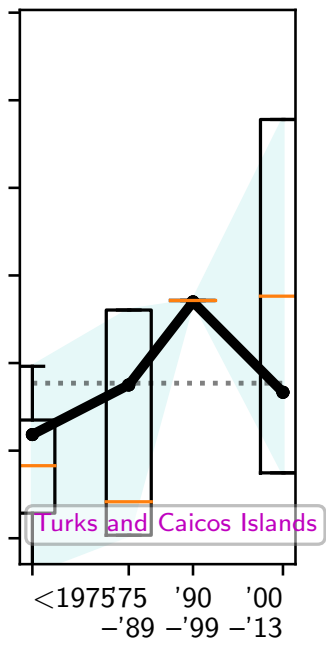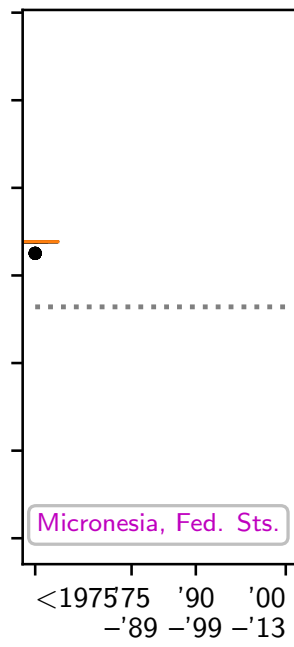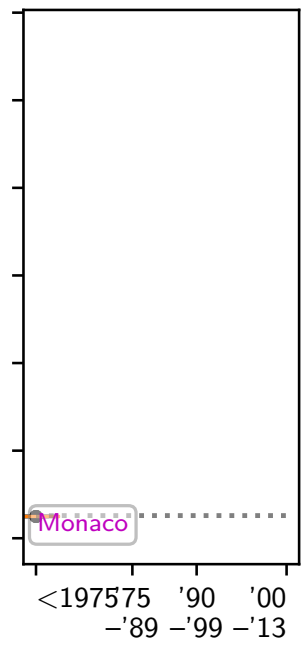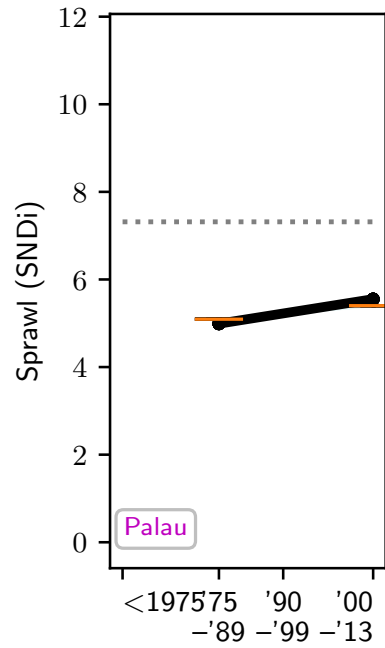

## F.11 City trend plots (by region)

The following plots show city trends in each region. Each line represents one city; in some cases there is more than one city per country. For more detail, see the tabular data. The following pages show results only for SNDi. Other metrics are available online at:

<https://alum.mit.edu/www/cpbl/publications/2020-PNAS-sprawl>.

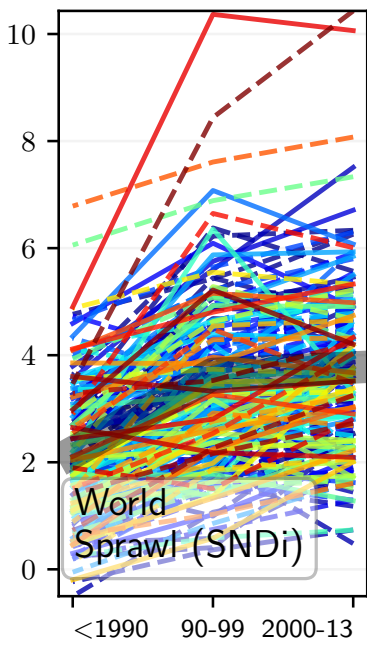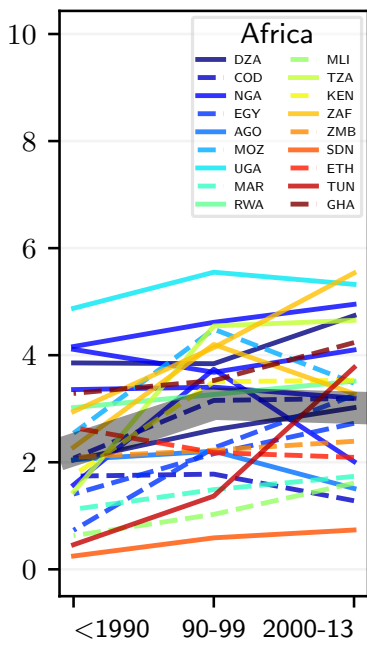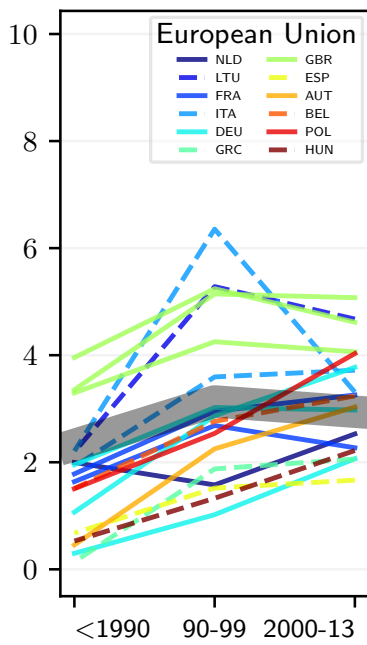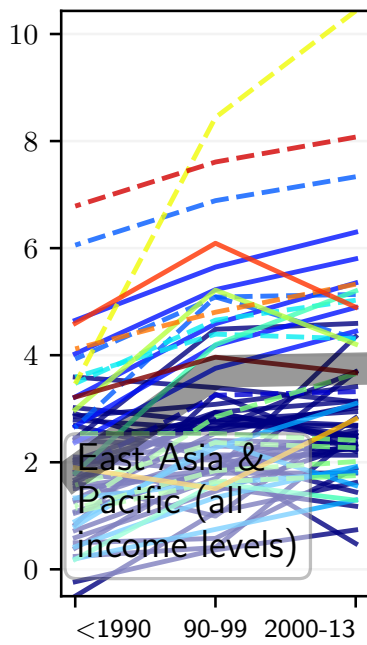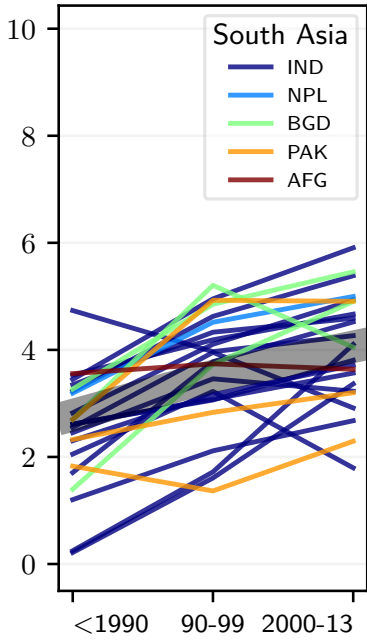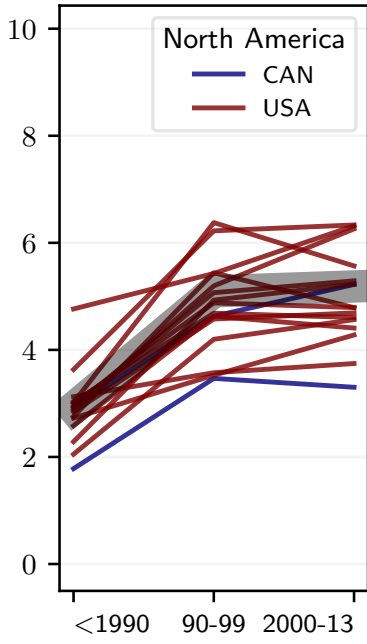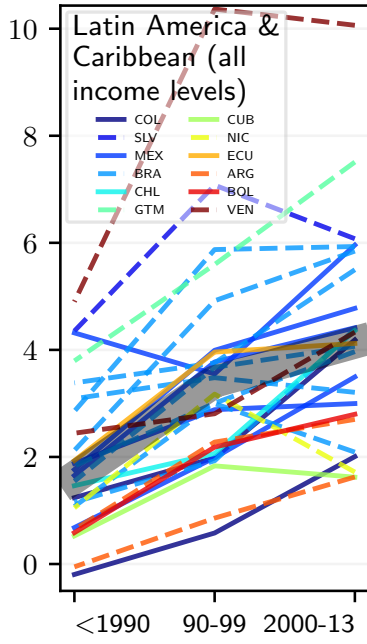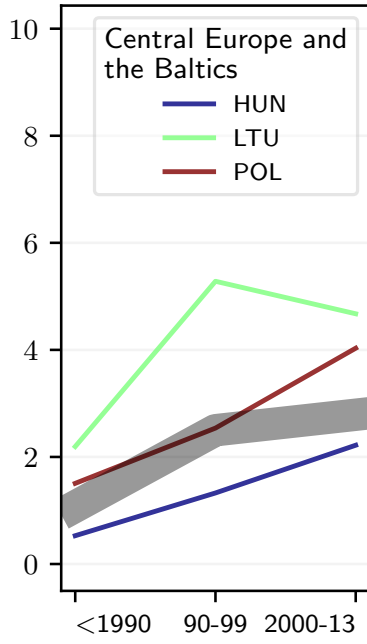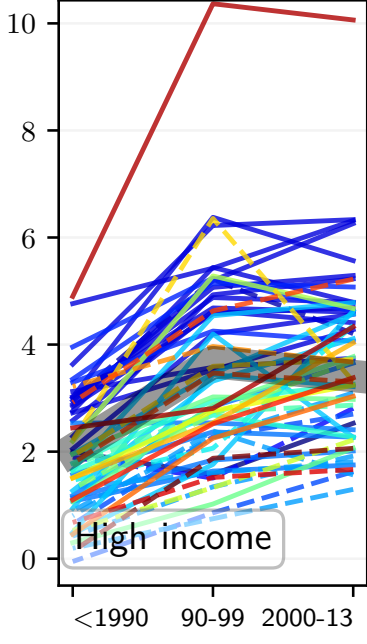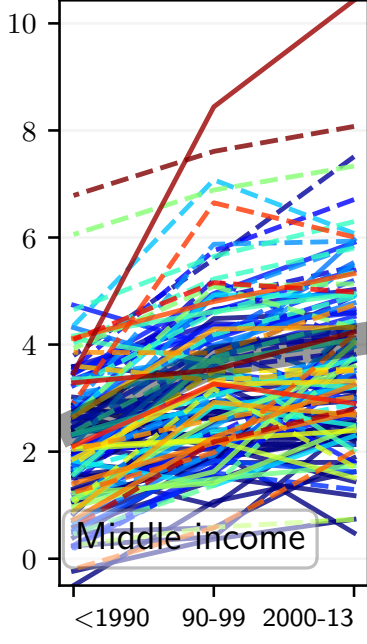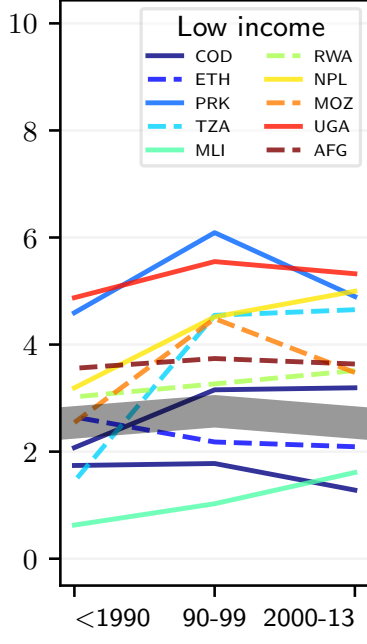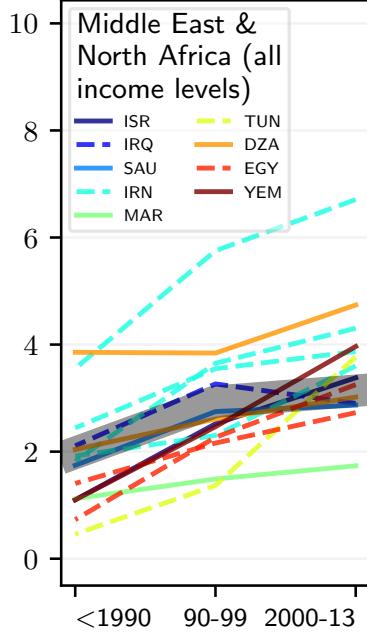

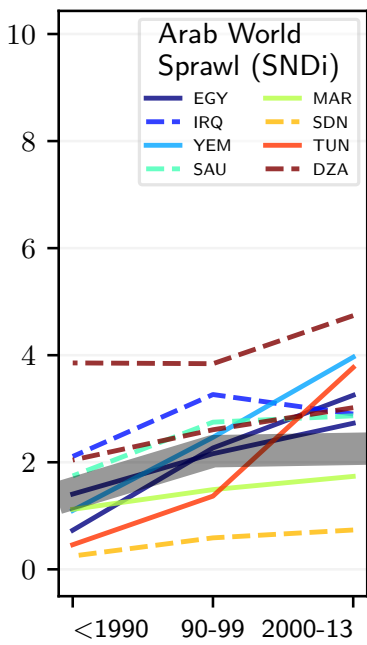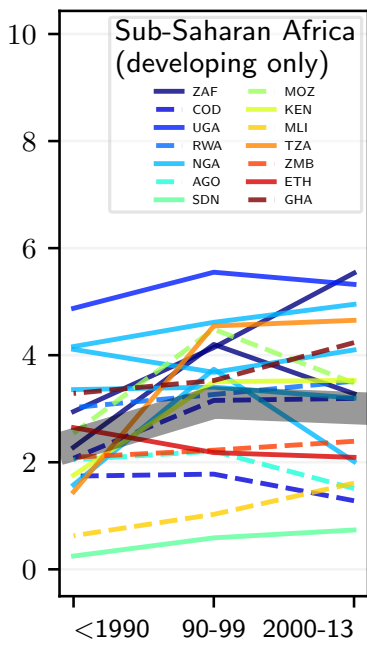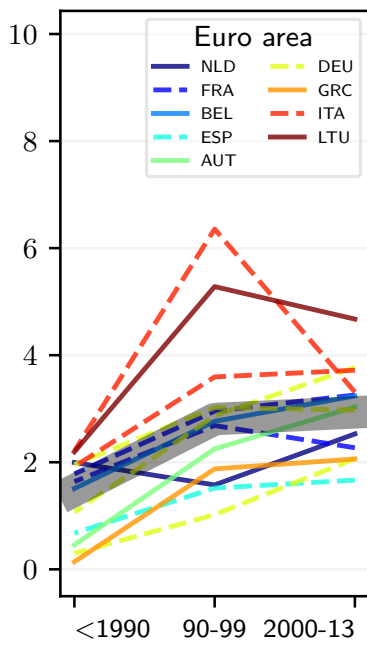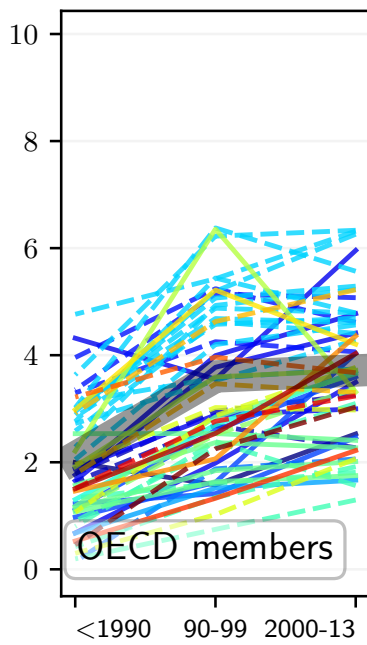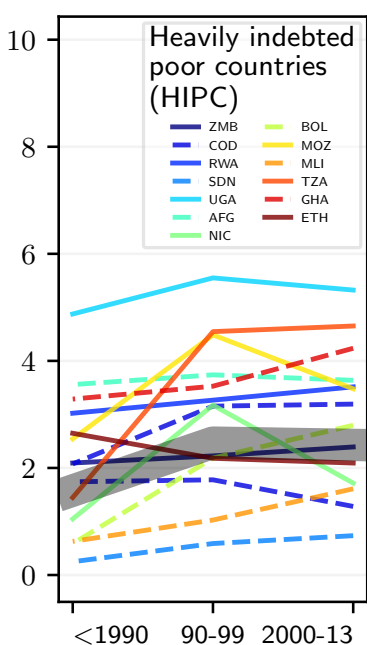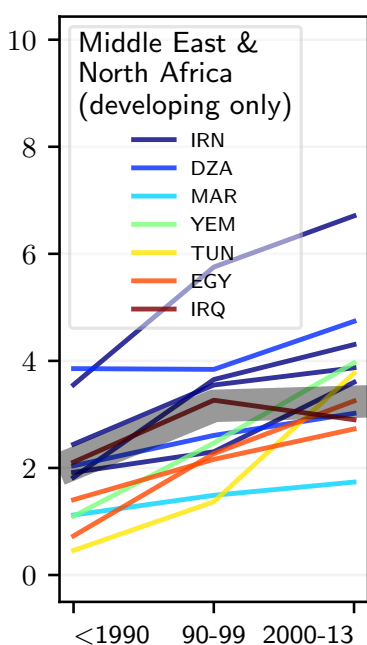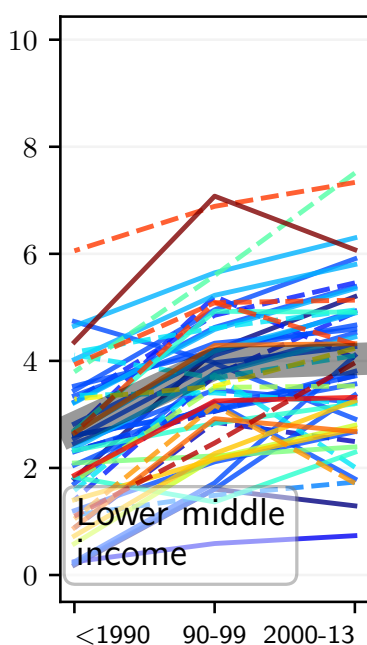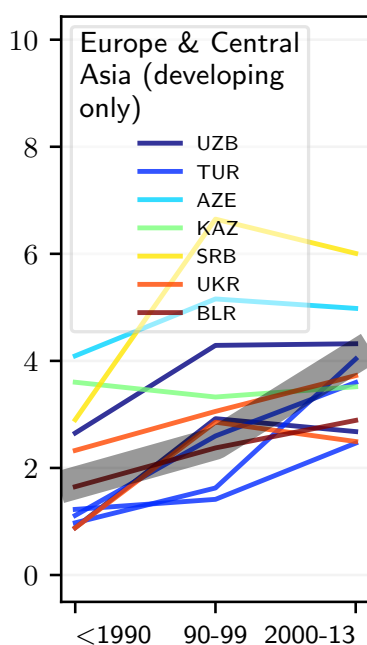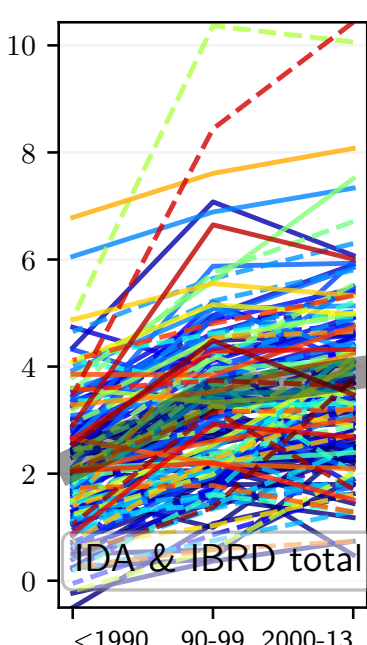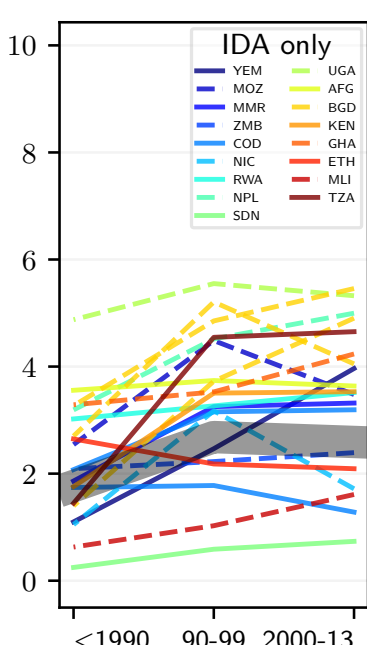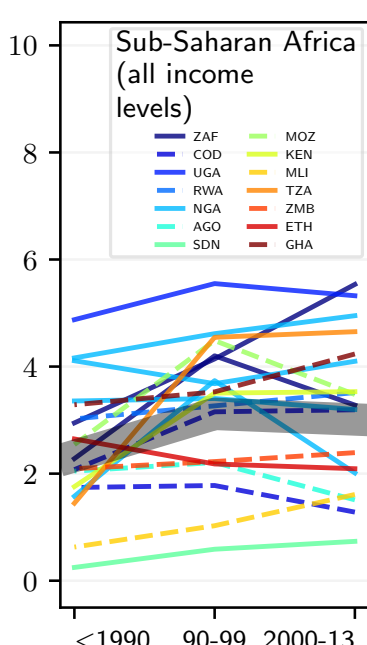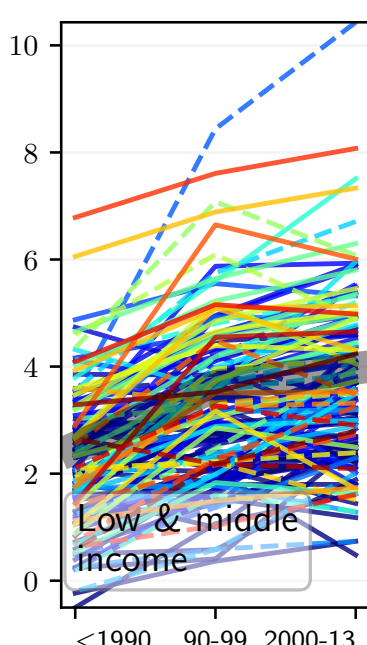

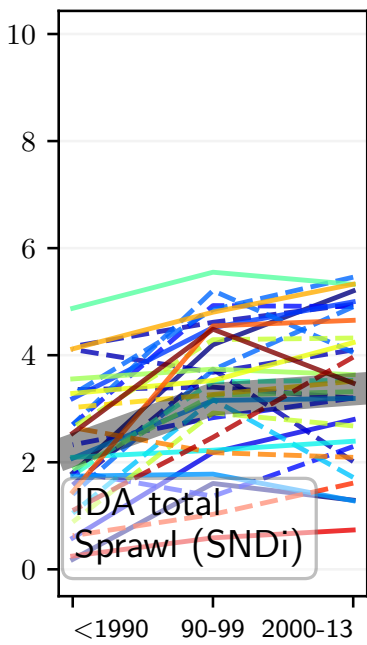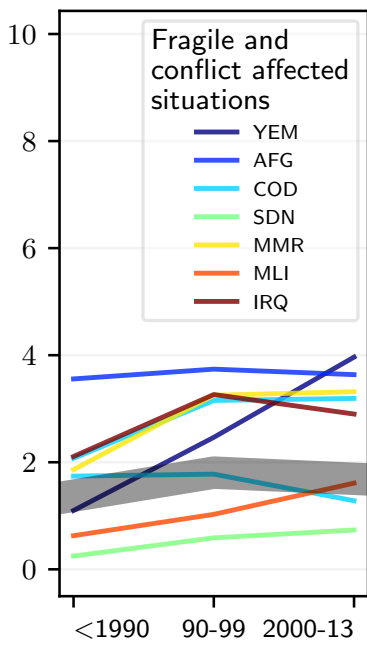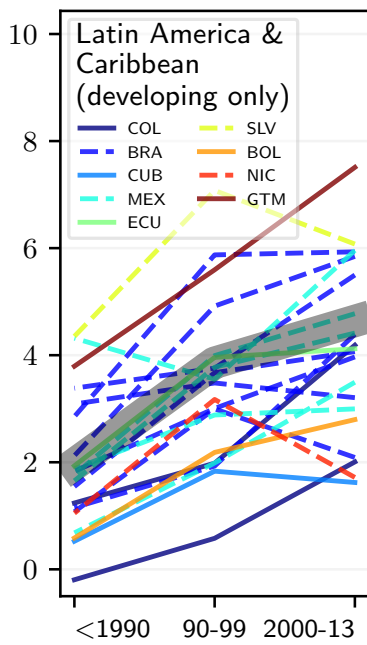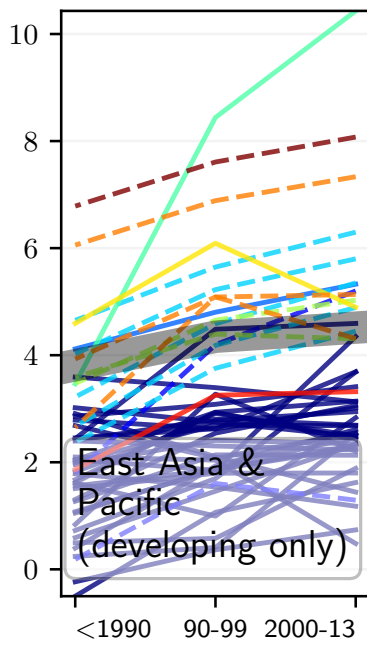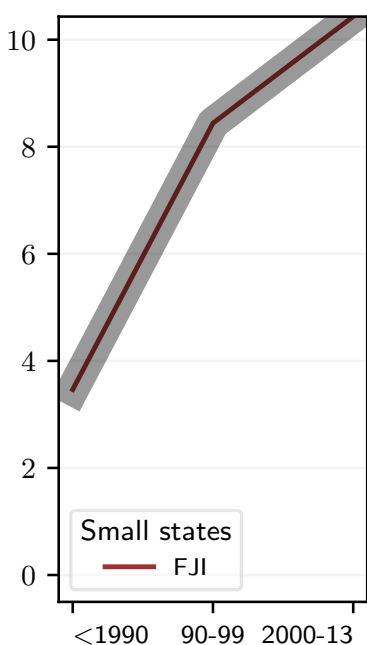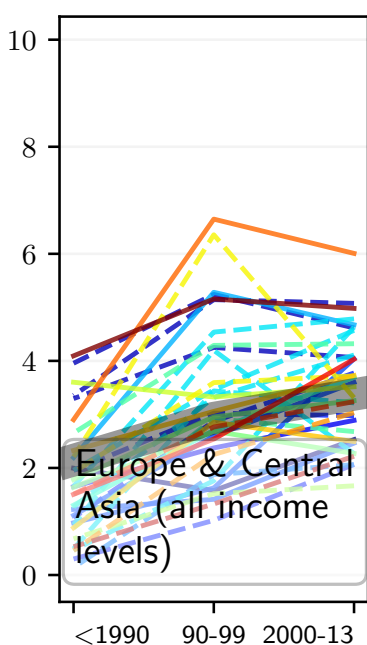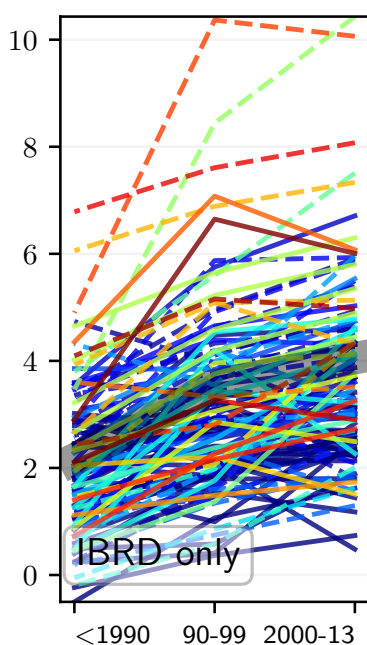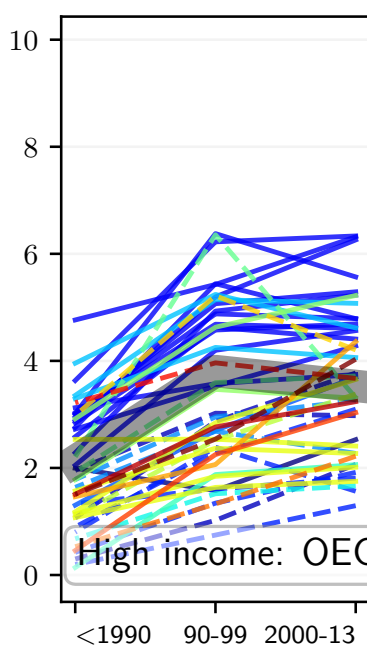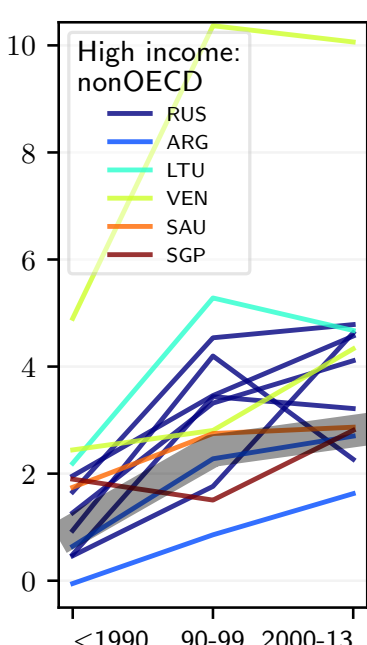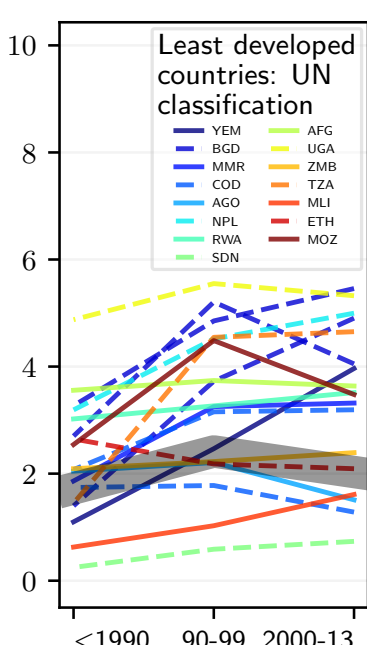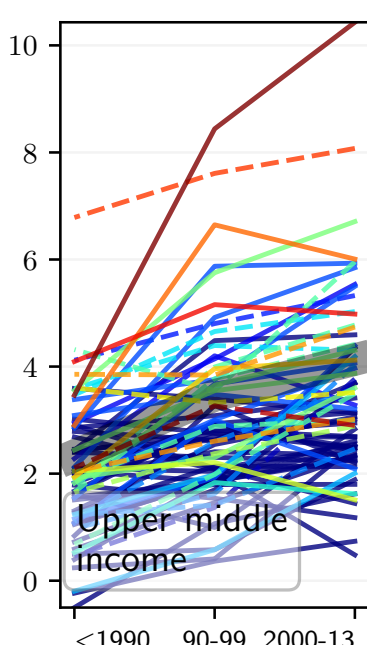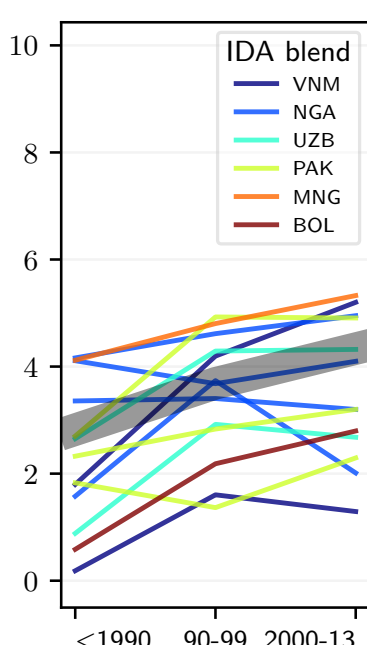

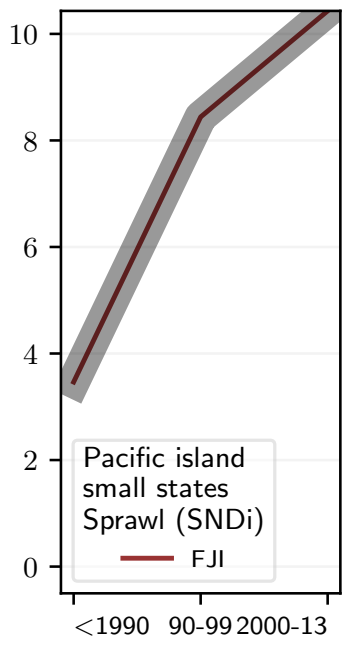

## F.12 City trend plots (by country)

In the plots below, the widest gray line is centered on the trend for the entire country's urban street network, while the less wide gray line is the node-weighted average over only the cities shown (i.e., all those available in the Atlas of Urban Expansion). Quantities are exact; line width does *not* represent confidence intervals. Countries are ordered by the number of nodes in the 2018 road stock. For more detail, see the tabular data.

The following pages show results only for SNDi. Other metrics are available online at: <https://alum.mit.edu/www/cpbl/publications/2020-PNAS-sprawl>.

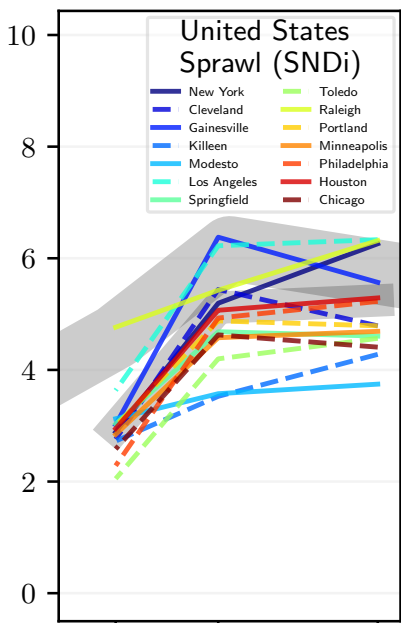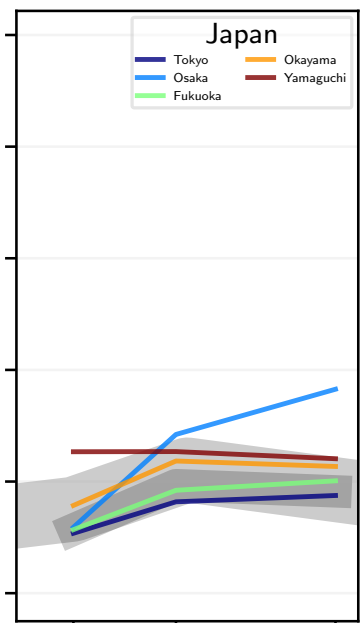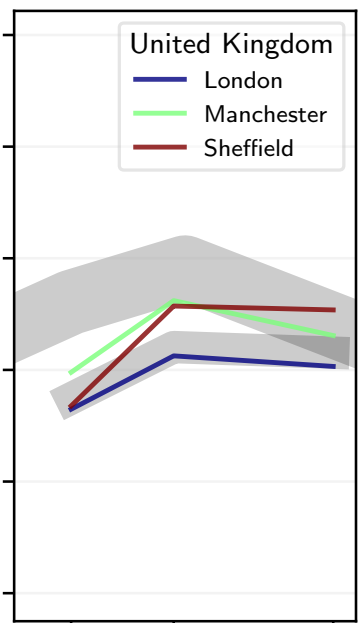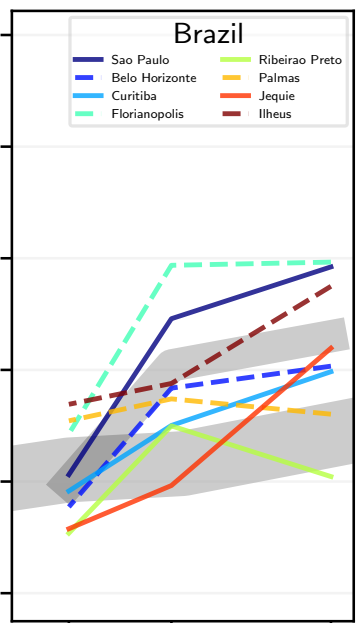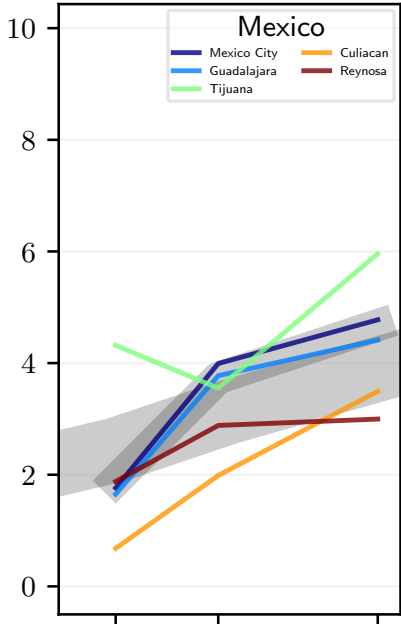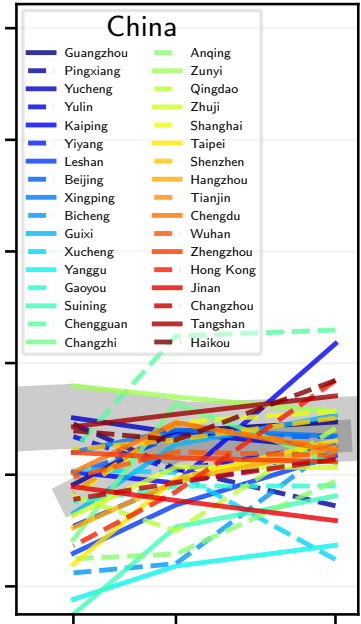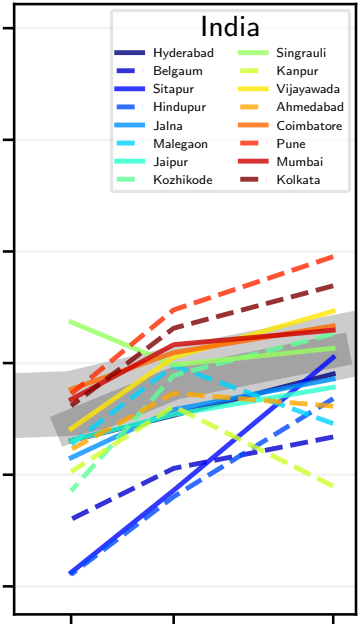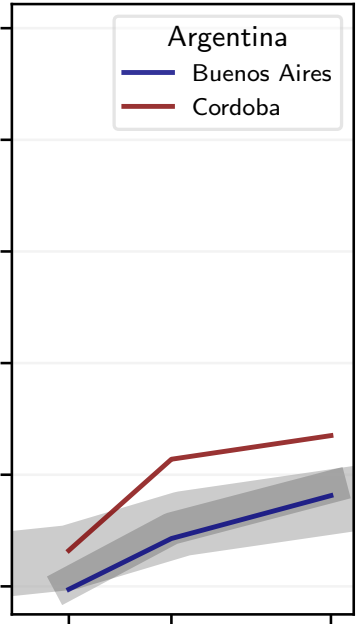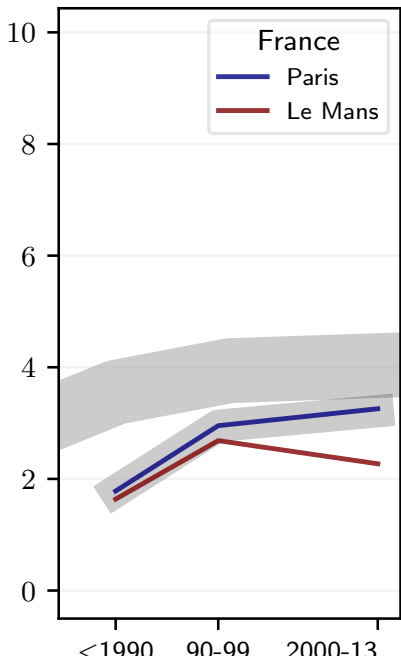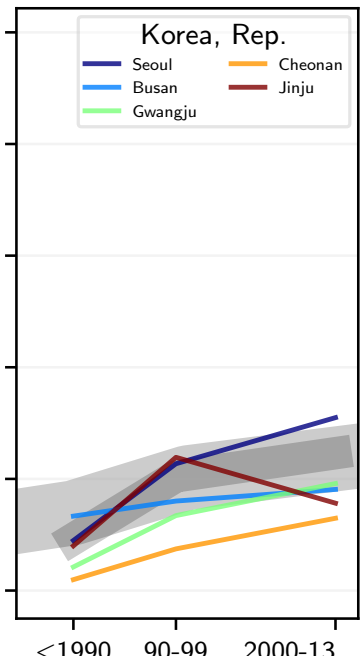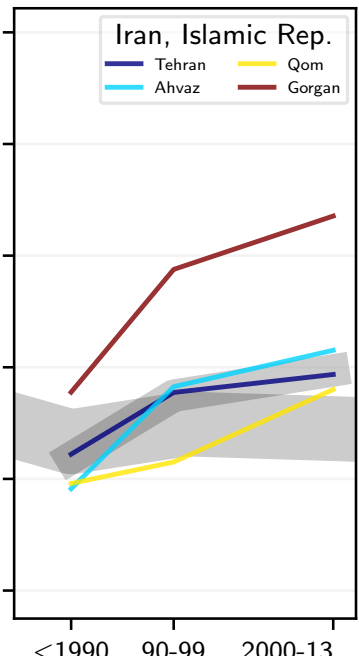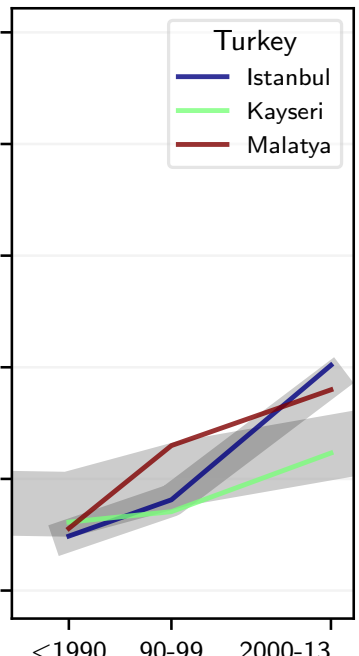

<1990    90-99    2000-13



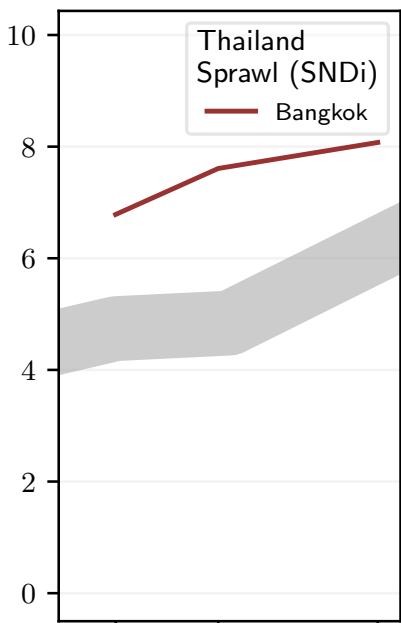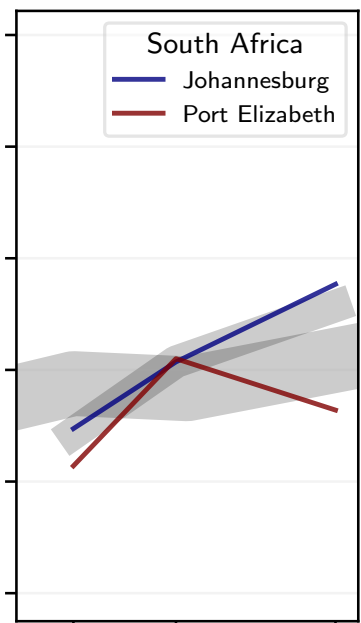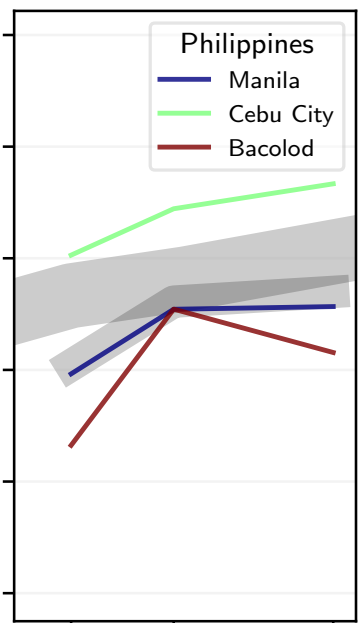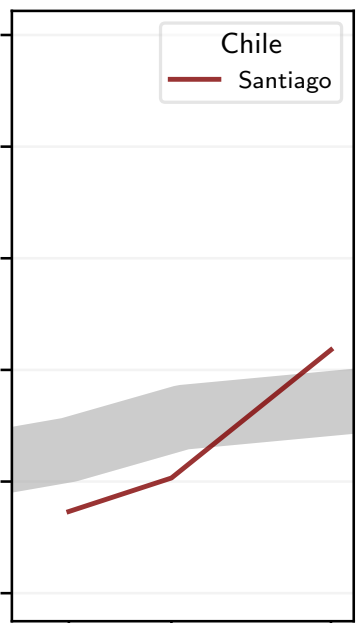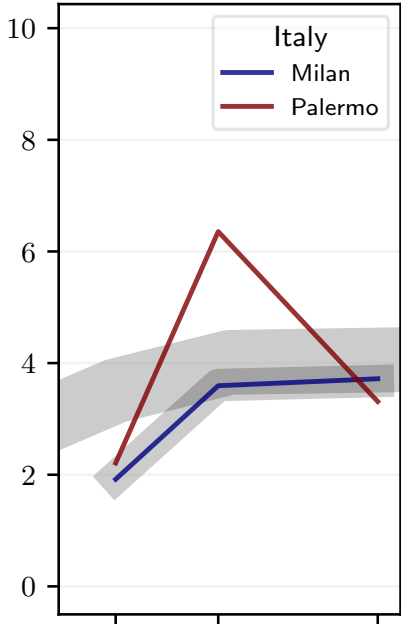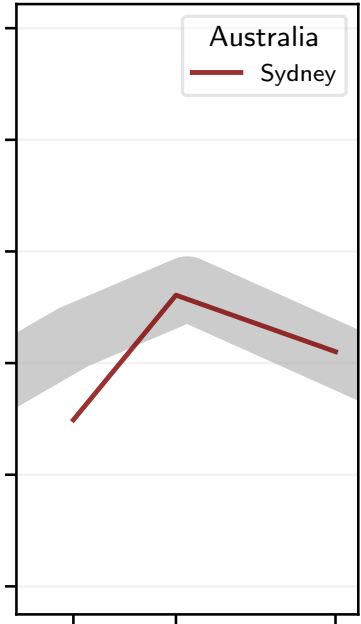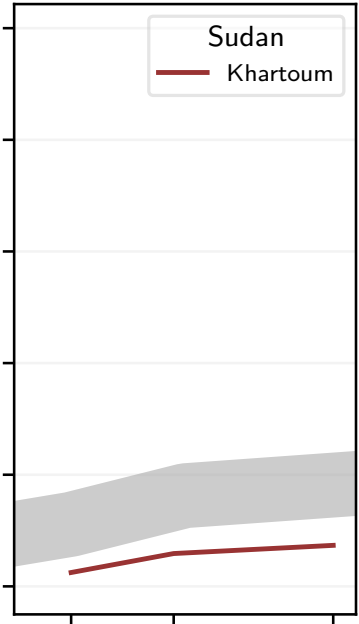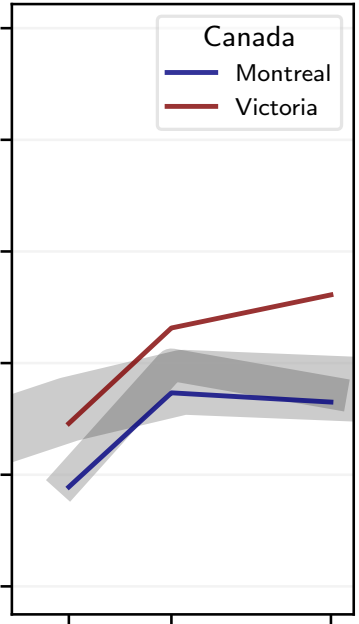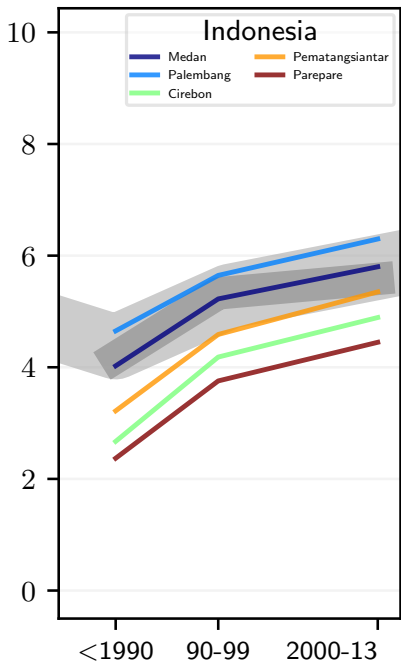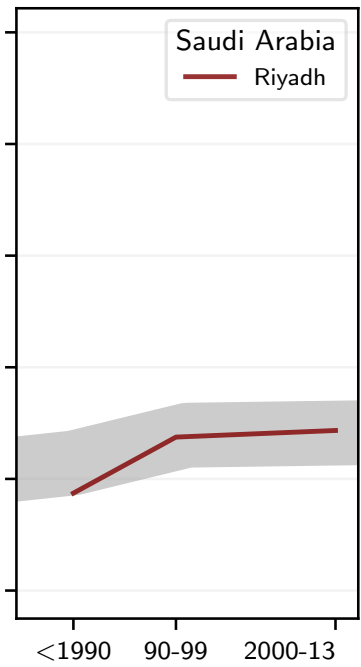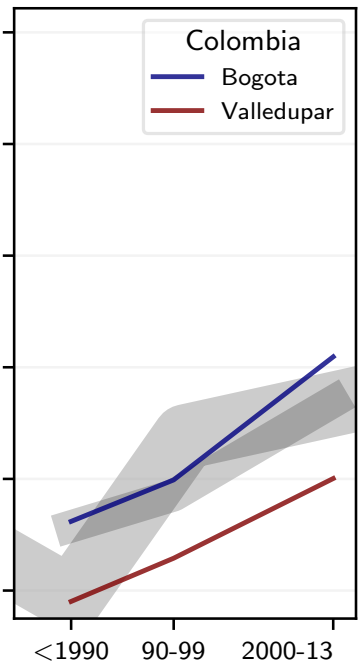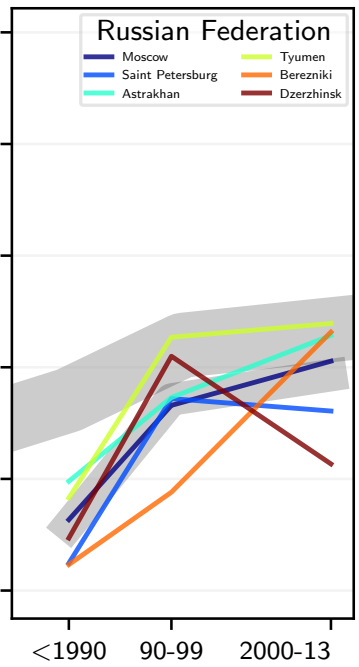

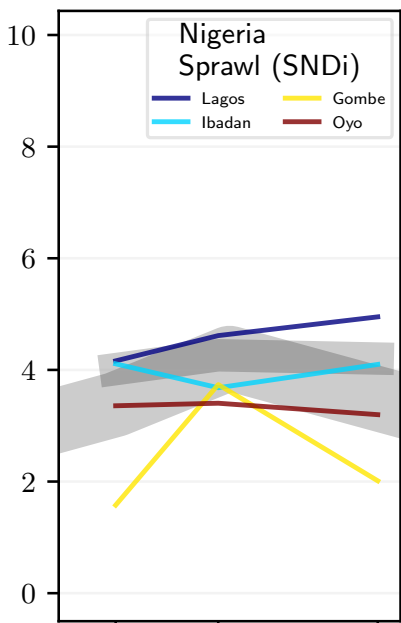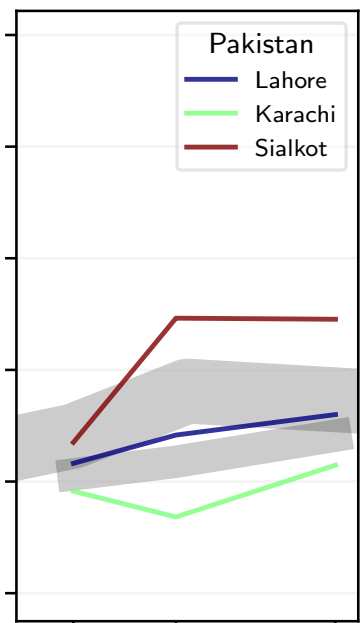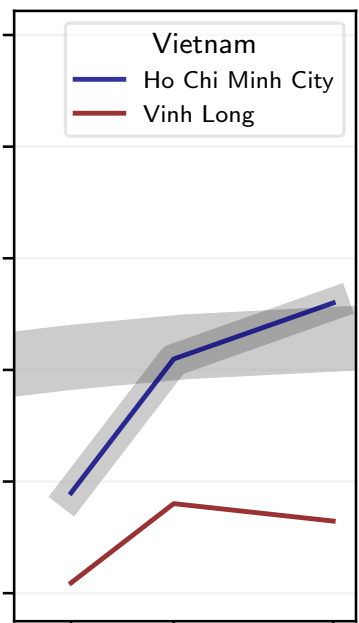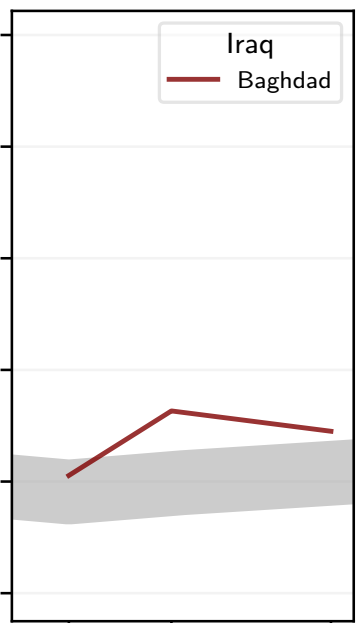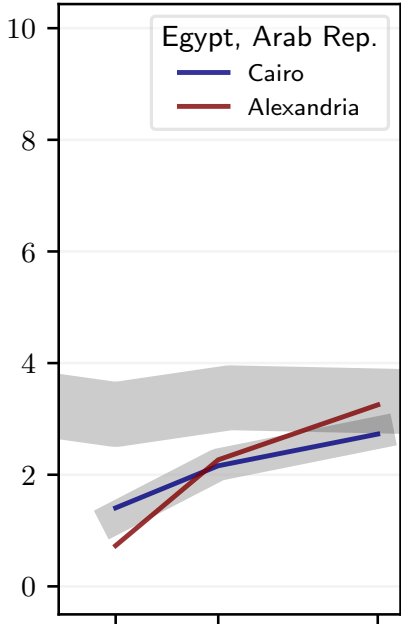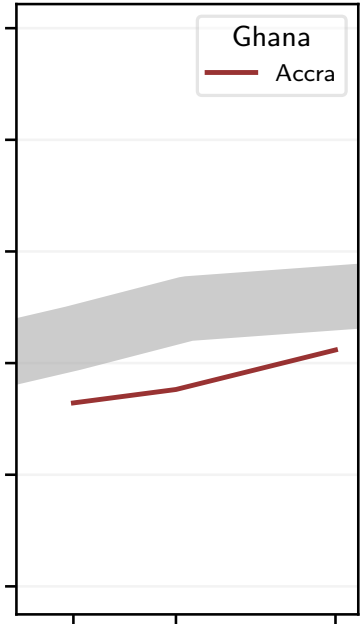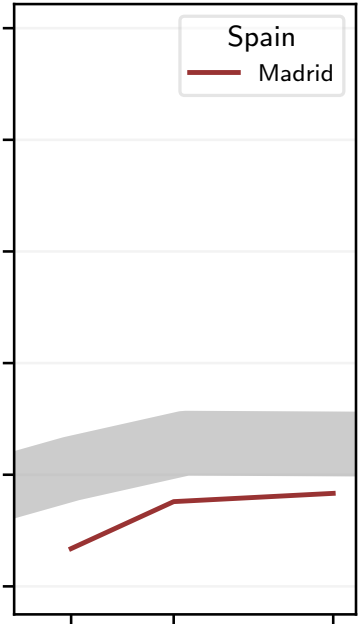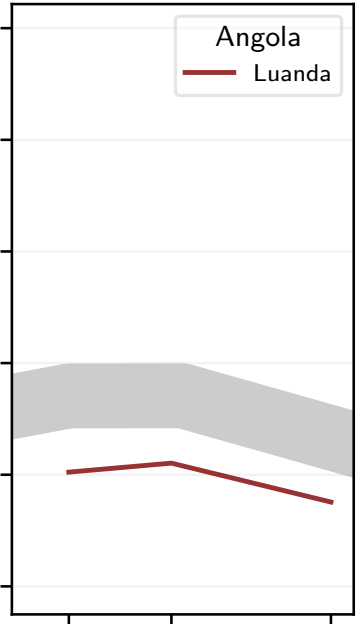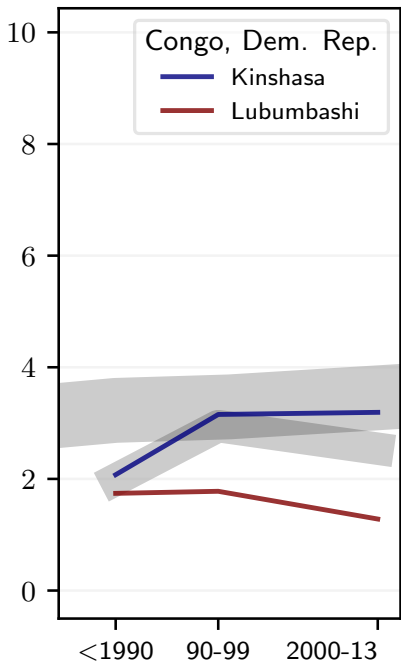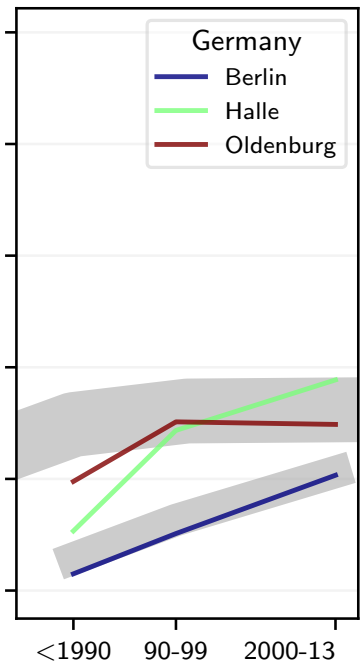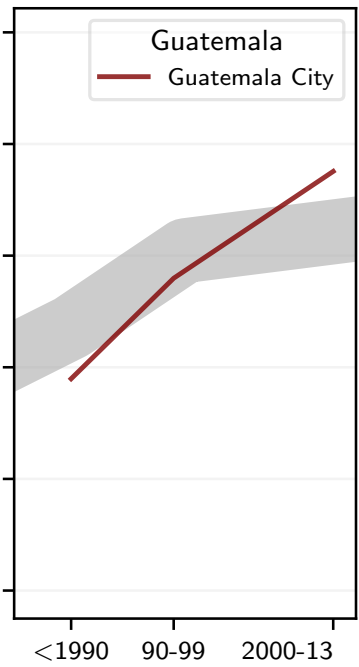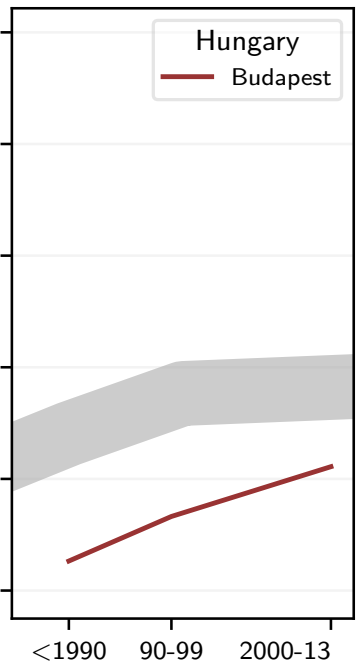

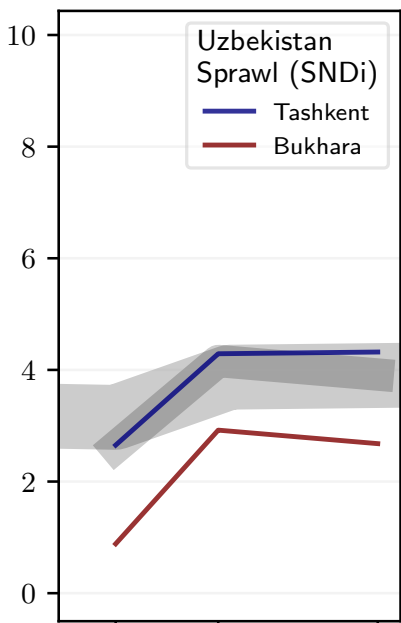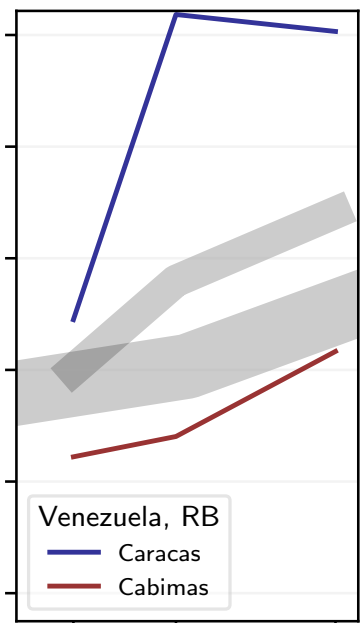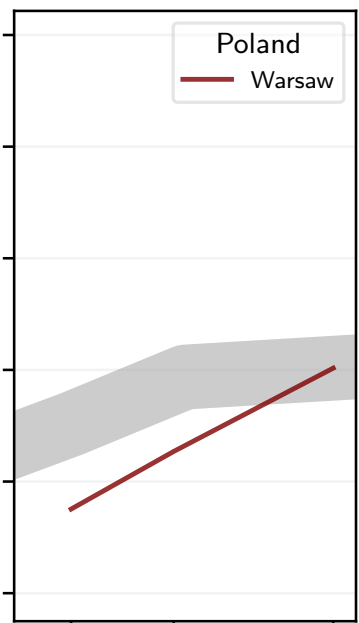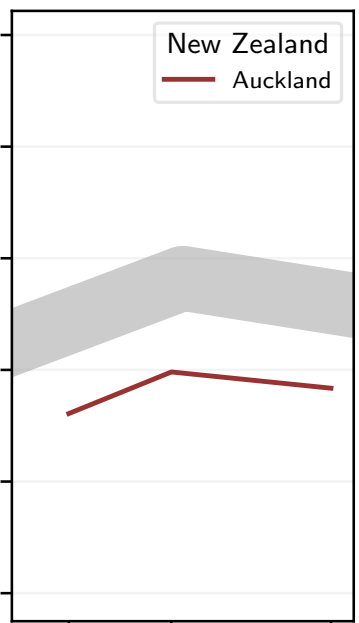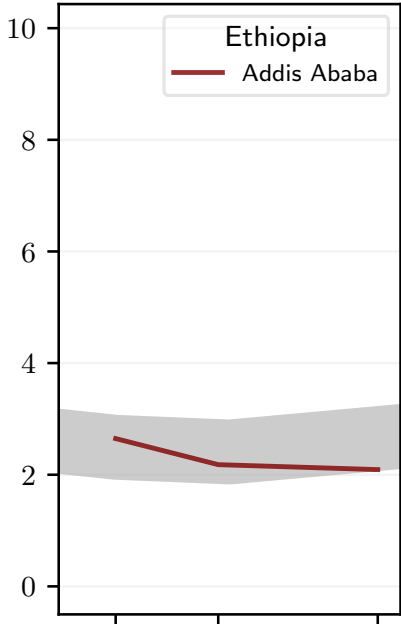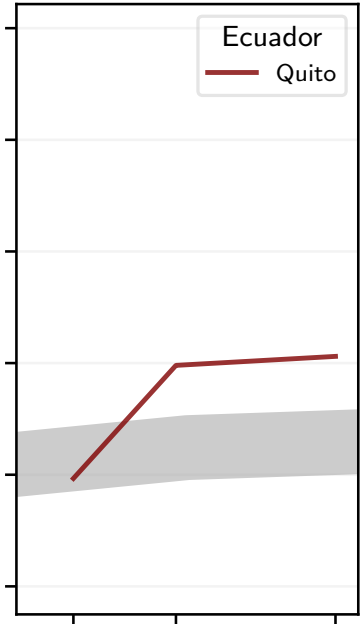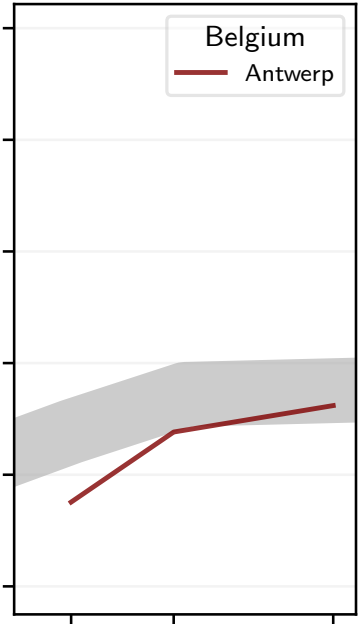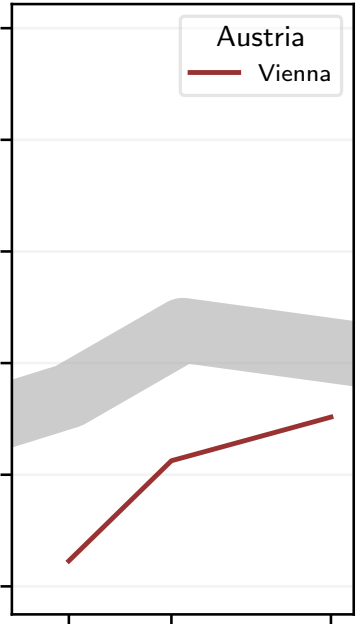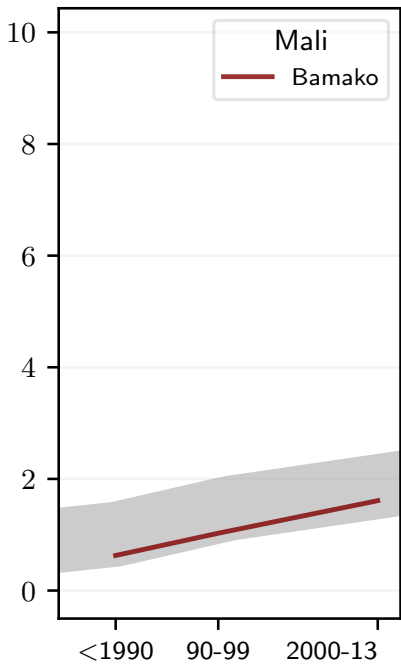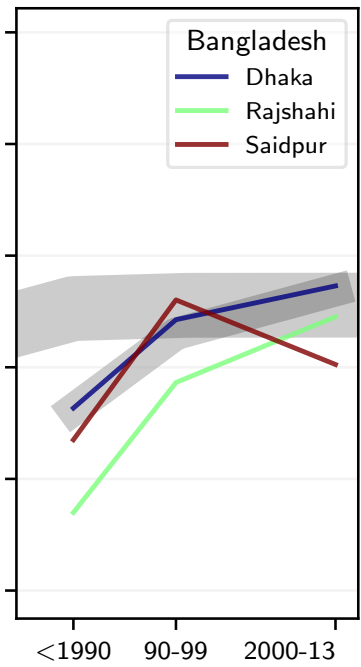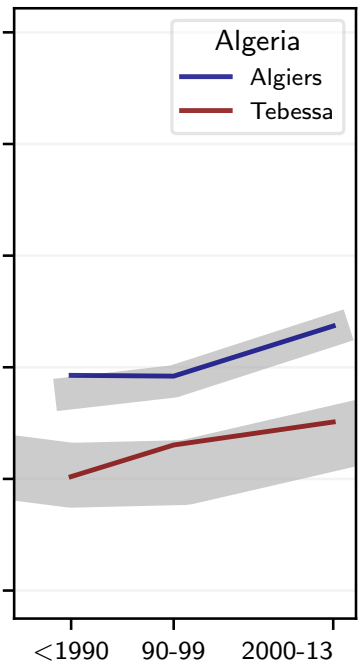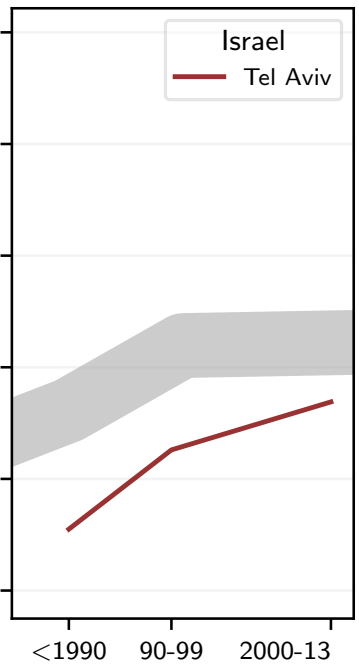

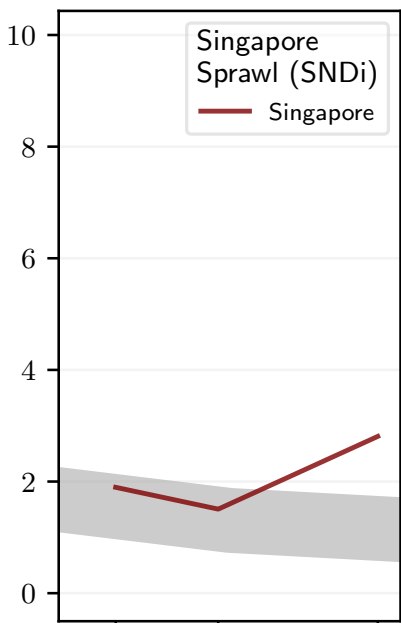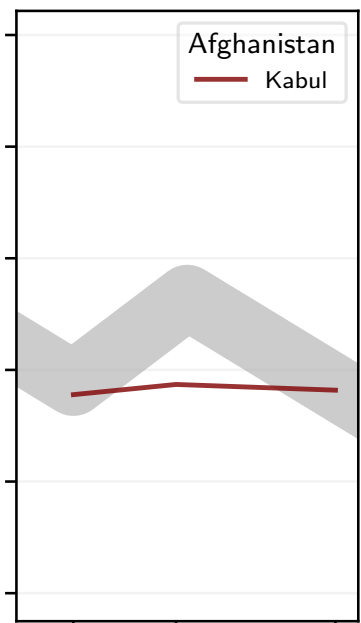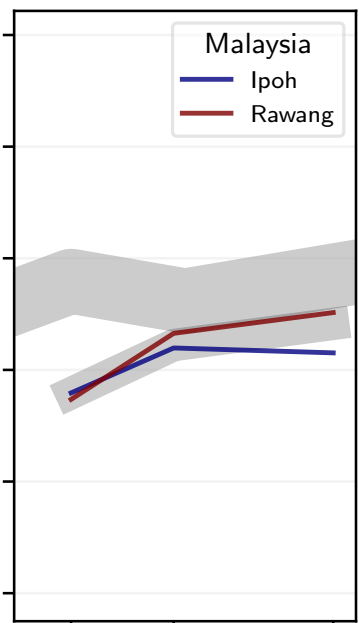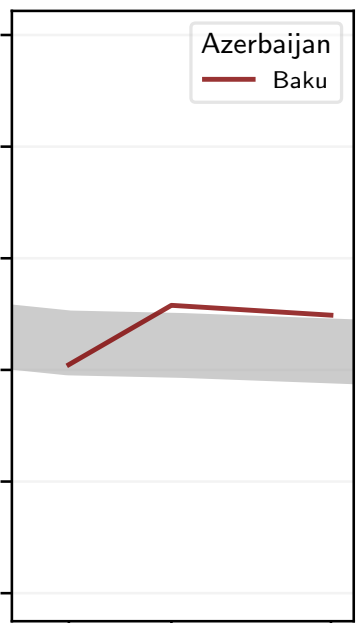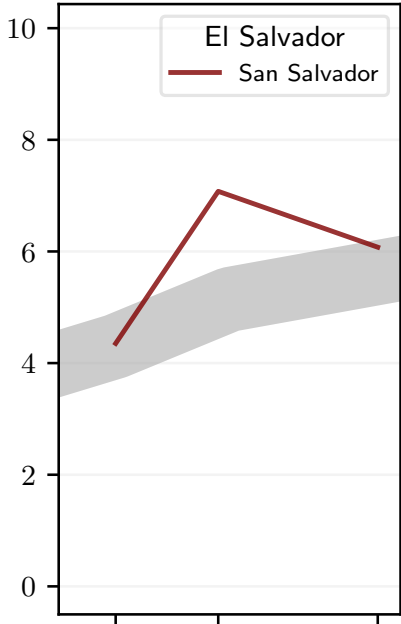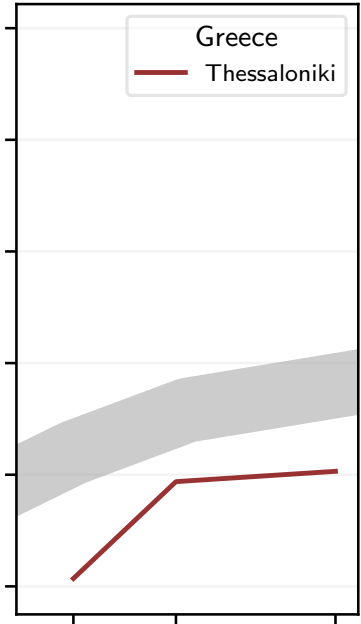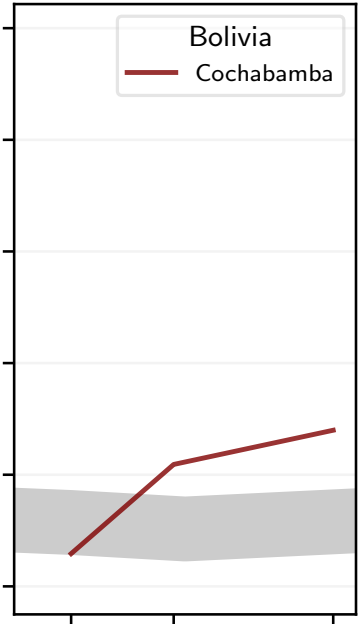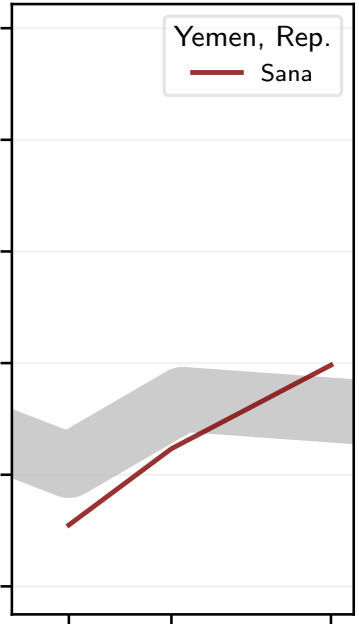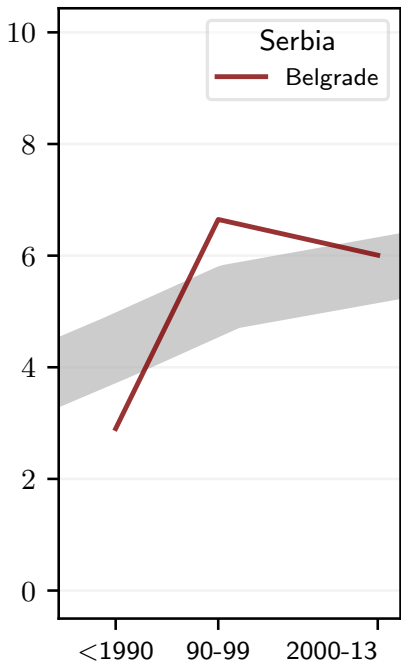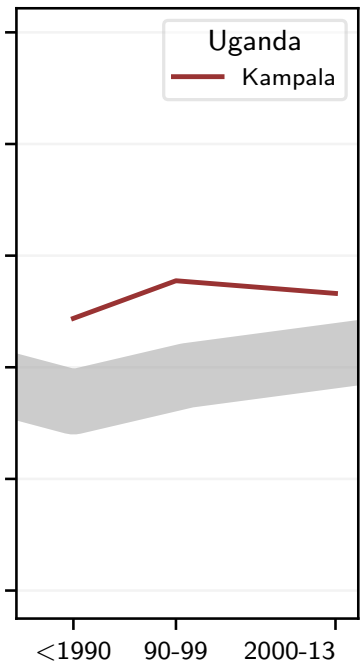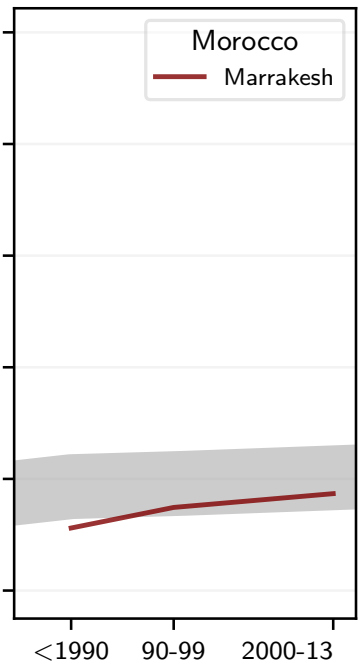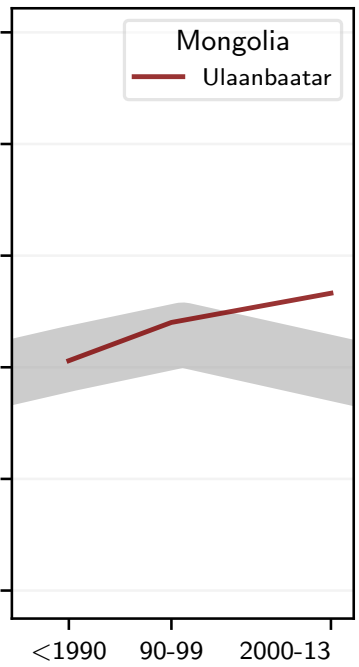

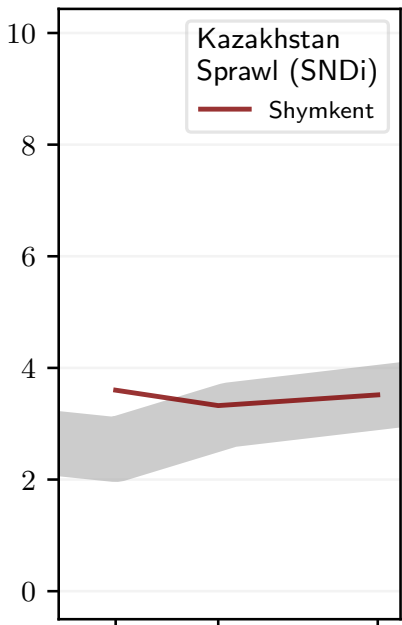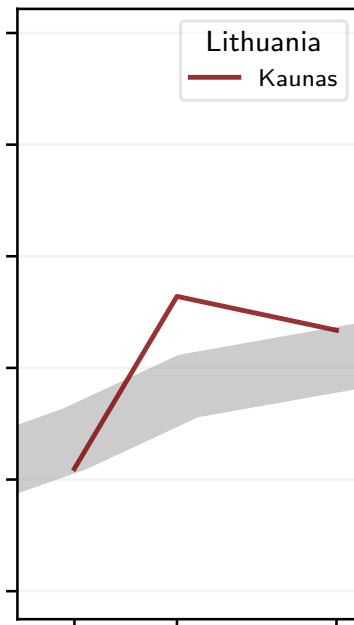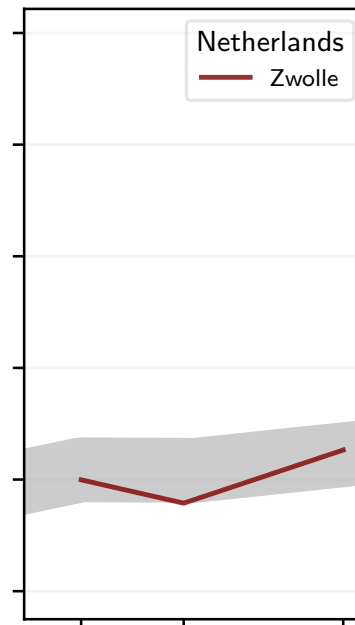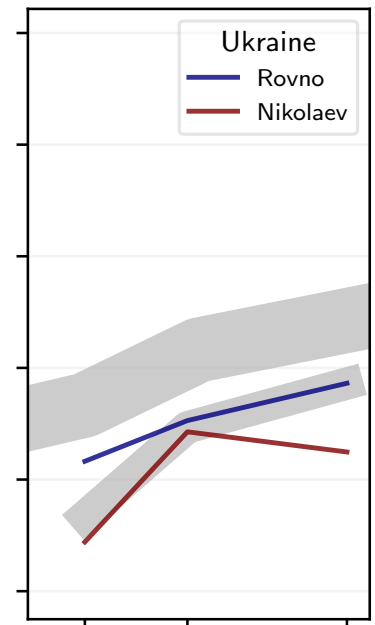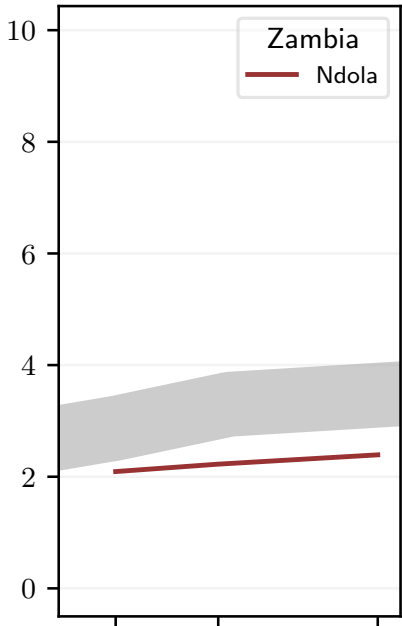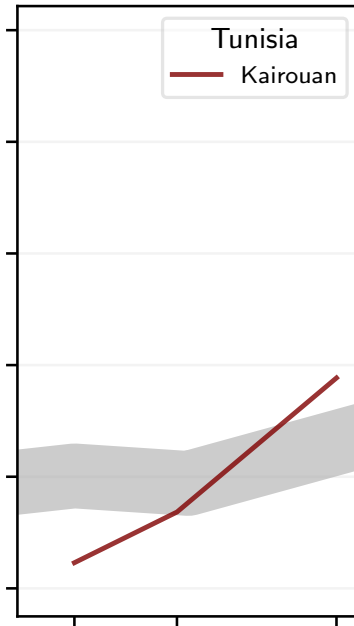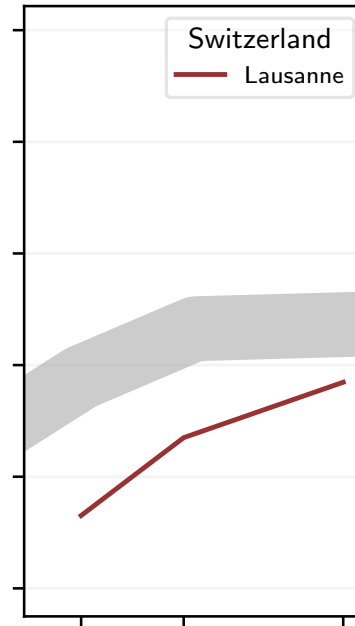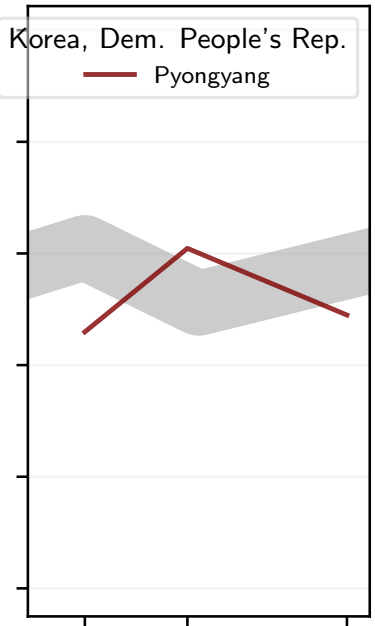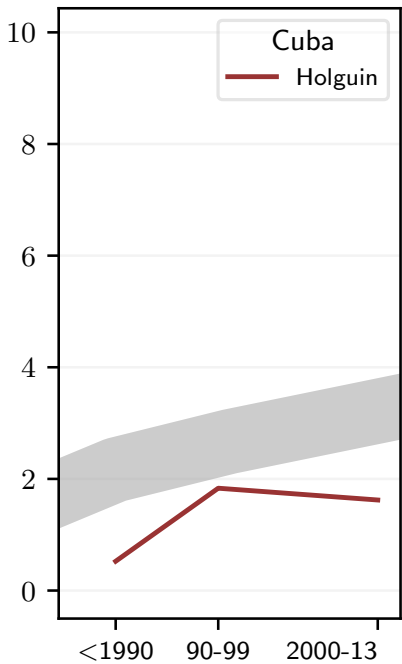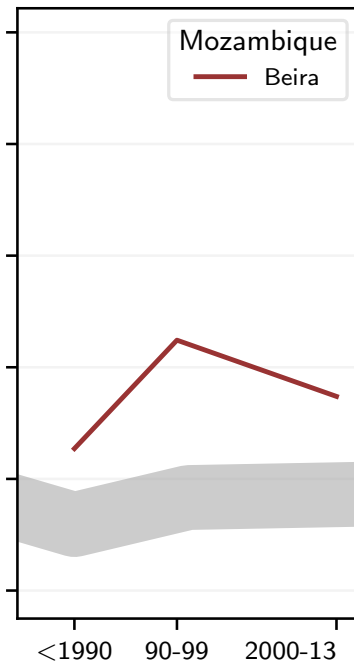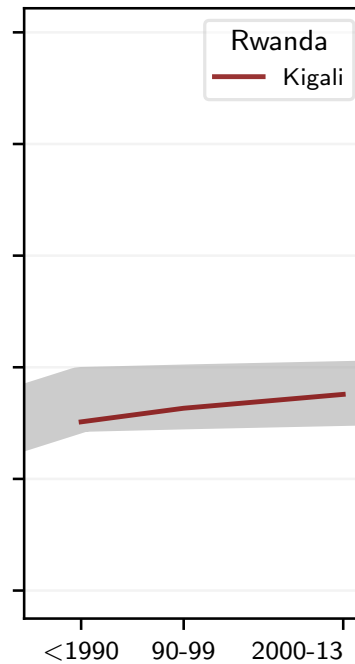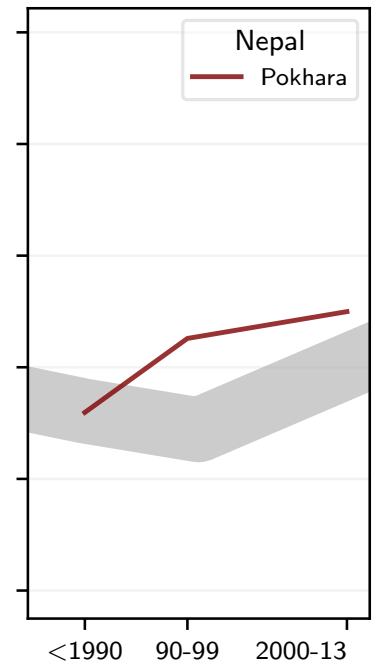

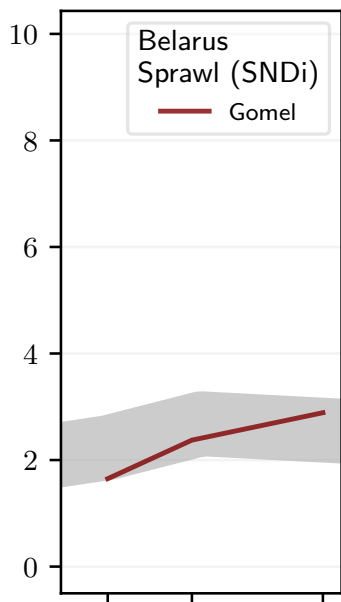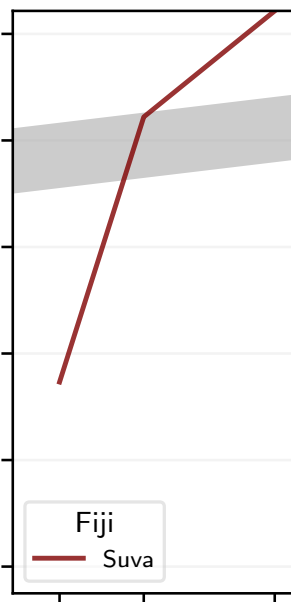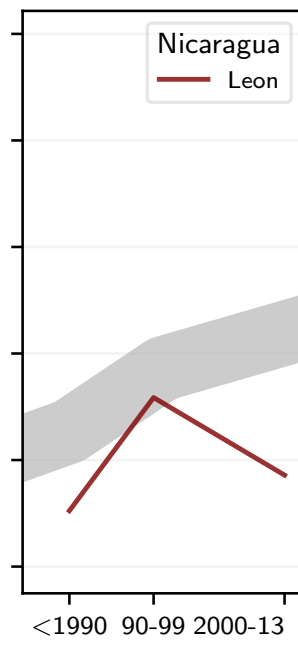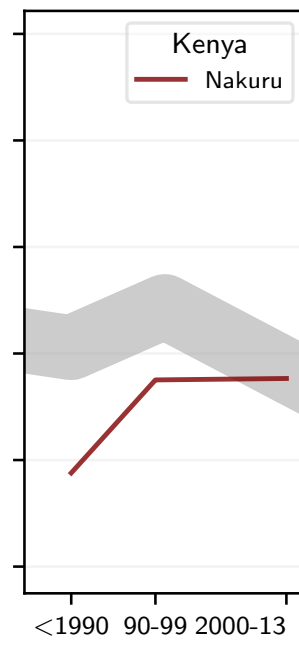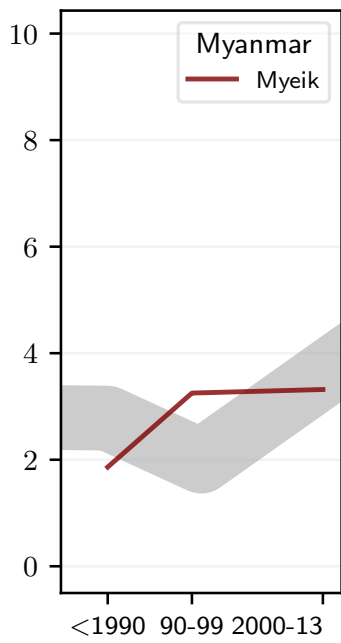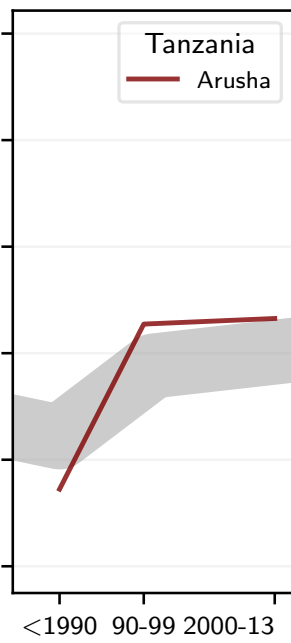

Supplement: pnas.1905232116.sapp.pdf [file pnas.1905232116.sapp.pdf]
